# Supplementary material
Source: MDPI journal article supplement (https://www.mdpi.com/2218-2004/10/4/131)
Supplement: s1 [file s1]

Table S1: Wavelengths ( $\lambda$ , in Å) in vacuum, weighted oscillator strengths ( $gf$ , dimensionless), line strengths ( $S$ , in atomic units) and transition rates ( $A$ , in  $s^{-1}$ ) for E1 transitions from the present (RCI and MBPT) and previous results of Siegel et al. [17], Froese Fischer et al. [20], Liang et al. [22] and NIST ASD [48] for  $Ar^{7+}$ . The estimated uncertainty (Unc.) in the  $A$  values are presented in the last column. The results listed here are in length gauge.

| Upper level    | Lower level    | $\lambda$ [RCI] | $gf$ [RCI] | $gf$ Ref. [17] | $S$ [RCI] | $S$ [MBPT] | $S$ Ref. [48] | $S$ Ref. [20] | $S$ Ref. [22] | $A$ [RCI] | Unc. |
|----------------|----------------|-----------------|------------|----------------|-----------|------------|---------------|---------------|---------------|-----------|------|
| $3d^2 D_{3/2}$ | $3p^2 P_{1/2}$ | 517.65          | 1.013e+00  | 1.019e+00      | 1.726e+00 | 1.810e+00  | 1.700e+00     | 1.726e+00     | 1.822e+00     | 6.304e+09 | B+   |
| $3d^2 D_{3/2}$ | $3p^2 P_{3/2}$ | 525.03          | 2.002e-01  | 2.015e-01      | 3.461e-01 | 3.627e-01  | 3.500e-01     | 3.462e-01     | 3.645e-01     | 1.211e+09 | B+   |
| $3d^2 D_{5/2}$ | $3p^2 P_{3/2}$ | 524.72          | 1.803e+00  | 1.816e+00      | 3.115e+00 | 3.265e+00  | 3.100e+00     | 3.114e+00     | 3.294e+00     | 7.280e+09 | B+   |
| $3p^2 P_{1/2}$ | $3s^2 S_{1/2}$ | 714.53          | 3.685e-01  | 3.728e-01      | 8.668e-01 | 9.122e-01  | 8.600e-01     | 8.664e-01     | 9.228e-01     | 2.407e+09 | B+   |
| $3p^2 P_{3/2}$ | $3s^2 S_{1/2}$ | 700.94          | 7.533e-01  | 7.622e-01      | 1.738e+00 | 1.829e+00  | 1.730e+00     | 1.738e+00     | 1.847e+00     | 2.557e+09 | B+   |
| $4d^2 D_{3/2}$ | $3p^2 P_{1/2}$ | 179.09          | 2.650e-01  | 2.620e-01      | 1.563e-01 | 1.557e-01  |               | 1.583e-01     | 1.489e-01     | 1.378e+10 | B+   |
| $4d^2 D_{3/2}$ | $4p^2 P_{1/2}$ | 1440.66         | 1.608e+00  | 1.604e+00      | 7.628e+00 | 7.703e+00  | 8.900e+00     | 7.642e+00     | 7.736e+00     | 1.292e+09 | B+   |
| $4d^2 D_{3/2}$ | $3p^2 P_{3/2}$ | 179.96          | 5.459e-02  | 5.404e-02      | 3.234e-02 | 3.225e-02  |               | 3.230e-02     | 3.076e-02     | 2.811e+09 | C+   |
| $4d^2 D_{3/2}$ | $4p^2 P_{3/2}$ | 1461.94         | 3.179e-01  | 3.170e-01      | 1.530e+00 | 1.545e+00  |               | 1.529e+00     | 1.554e+00     | 2.480e+08 | B+   |
| $4d^2 D_{5/2}$ | $3p^2 P_{3/2}$ | 179.94          | 4.915e-01  | 4.848e-01      | 2.912e-01 | 2.895e-01  |               | 2.907e-01     | 2.770e-01     | 1.688e+10 | B+   |
| $4d^2 D_{5/2}$ | $4p^2 P_{3/2}$ | 1460.76         | 2.862e+00  | 2.856e+00      | 1.376e+01 | 1.390e+01  | 1.600e+01     | 1.376e+01     | 1.396e+01     | 1.491e+09 | B+   |
| $4f^2 F_{5/2}$ | $3d^2 D_{3/2}$ | 259.91          | 3.507e+00  |                | 3.001e+00 | 3.129e+00  | 3.180e+00     | 3.002e+00     | 3.120e+00     | 5.772e+10 | B+   |
| $4f^2 F_{5/2}$ | $4d^2 D_{3/2}$ | 5116.30         | 5.894e-01  |                | 9.927e+00 | 9.923e+00  |               |               | 9.968e+00     | 2.503e+07 | C+   |
| $4f^2 F_{5/2}$ | $3d^2 D_{5/2}$ | 259.98          | 2.506e-01  |                | 2.145e-01 | 2.236e-01  |               | 2.145e-01     | 2.230e-01     | 4.122e+09 | B+   |
| $4f^2 F_{7/2}$ | $3d^2 D_{5/2}$ | 259.96          | 5.012e+00  |                | 4.289e+00 | 4.472e+00  | 4.530e+00     | 4.291e+00     | 4.466e+00     | 6.184e+10 | B+   |
| $4f^2 F_{7/2}$ | $4d^2 D_{5/2}$ | 5123.02         | 8.408e-01  |                | 1.418e+01 | 1.418e+01  |               |               | 1.425e+01     | 2.671e+07 | C+   |
| $4p^2 P_{1/2}$ | $3s^2 S_{1/2}$ | 159.00          | 8.540e-02  | 8.298e-02      | 4.470e-02 | 4.240e-02  | 4.420e-02     | 4.521e-02     | 4.027e-02     | 1.127e+10 | B    |
| $4p^2 P_{1/2}$ | $4s^2 S_{1/2}$ | 1917.54         | 5.600e-01  | 5.642e-01      | 3.535e+00 | 3.572e+00  |               | 3.550e+00     | 3.598e+00     | 5.079e+08 | B+   |
| $4p^2 P_{1/2}$ | $3d^2 D_{3/2}$ | 338.07          | 2.649e-01  | 2.630e-01      | 2.949e-01 | 2.947e-01  | 4.200e-01     | 2.953e-01     | 2.920e-01     | 7.731e+09 | B+   |
| $4p^2 P_{3/2}$ | $3s^2 S_{1/2}$ | 158.75          | 1.646e-01  | 1.595e-01      | 8.600e-02 | 8.144e-02  | 8.700e-02     | 8.726e-02     | 7.811e-02     | 1.089e+10 | B    |
| $4p^2 P_{3/2}$ | $4s^2 S_{1/2}$ | 1881.09         | 1.143e+00  | 1.151e+00      | 7.076e+00 | 7.150e+00  |               | 7.096e+00     | 7.203e+00     | 5.385e+08 | B+   |
| $4p^2 P_{3/2}$ | $3d^2 D_{3/2}$ | 336.92          | 5.219e-02  | 5.176e-02      | 5.789e-02 | 5.788e-02  |               | 5.798e-02     | 5.739e-02     | 7.667e+08 | B    |
| $4p^2 P_{3/2}$ | $3d^2 D_{5/2}$ | 337.05          | 4.710e-01  | 4.666e-01      | 5.226e-01 | 5.214e-01  | 7.600e-01     | 5.233e-01     | 5.177e-01     | 6.914e+09 | B+   |
| $4s^2 S_{1/2}$ | $3p^2 P_{1/2}$ | 228.92          | 1.757e-01  | 1.752e-01      | 1.324e-01 | 1.331e-01  | 1.340e-01     | 1.333e-01     | 1.283e-01     | 1.118e+10 | B    |
| $4s^2 S_{1/2}$ | $3p^2 P_{3/2}$ | 230.36          | 3.589e-01  | 3.601e-01      | 2.722e-01 | 2.734e-01  | 2.680e-01     | 2.713e-01     | 2.647e-01     | 2.256e+10 | B+   |
| $5d^2 D_{3/2}$ | $3p^2 P_{1/2}$ | 137.69          | 1.124e-01  | 1.118e-01      | 5.097e-02 | 5.331e-02  |               |               | 4.879e-02     | 9.889e+09 | B    |
| $5d^2 D_{3/2}$ | $4p^2 P_{1/2}$ | 421.42          | 1.760e-01  | 1.782e-01      | 2.442e-01 | 2.528e-01  |               |               | 2.364e-01     | 1.653e+09 | B+   |
| $5d^2 D_{3/2}$ | $5p^2 P_{1/2}$ | 3024.45         | 2.115e+00  | 2.104e+00      | 2.106e+01 | 2.111e+01  |               |               | 2.125e+01     | 3.855e+08 | C+   |
| $5d^2 D_{3/2}$ | $3p^2 P_{3/2}$ | 138.21          | 2.294e-02  | 2.285e-02      | 1.044e-02 | 1.092e-02  |               |               | 1.006e-02     | 2.003e+09 | C+   |
| $5d^2 D_{3/2}$ | $4p^2 P_{3/2}$ | 423.22          | 3.672e-02  | 3.724e-02      | 5.116e-02 | 5.290e-02  |               |               | 4.980e-02     | 3.419e+08 | B    |
| $5d^2 D_{3/2}$ | $5p^2 P_{3/2}$ | 3069.39         | 4.180e-01  | 4.160e-01      | 4.224e+00 | 4.234e+00  |               |               | 4.256e+00     | 7.398e+07 | C+   |
| $5d^2 D_{3/2}$ | $4f^2 F_{5/2}$ | 674.14          | 1.309e-01  |                | 2.905e-01 | 2.950e-01  |               |               | 2.804e-01     | 4.804e+08 | B+   |
| $5d^2 D_{5/2}$ | $3p^2 P_{3/2}$ | 138.20          | 2.073e-01  | 2.052e-01      | 9.432e-02 | 9.805e-02  |               |               | 9.052e-02     | 1.207e+10 | B    |
| $5d^2 D_{5/2}$ | $4p^2 P_{3/2}$ | 423.17          | 3.308e-01  | 3.335e-01      | 4.609e-01 | 4.743e-01  |               |               | 4.447e-01     | 2.054e+09 | B+   |
| $5d^2 D_{5/2}$ | $5p^2 P_{3/2}$ | 3066.67         | 3.763e+00  | 3.856e+00      | 3.799e+01 | 3.811e+01  |               |               | 3.831e+01     | 4.448e+08 | C+   |
| $5d^2 D_{5/2}$ | $4f^2 F_{5/2}$ | 674.01          | 9.345e-03  |                | 2.074e-02 | 2.101e-02  |               |               | 1.997e-02     | 2.287e+07 | C+   |

Table S1 – continued from previous page

| Upper level   | Lower level   | $\lambda$ [RCI] | $gf$ [RCI] | $gf$ Ref. [17] | $S$ [RCI] | $S$ [MBPT] | $S$ Ref. [48] | $S$ Ref. [20] | $S$ Ref. [22] | $A$ [RCI] | Unc. |
|---------------|---------------|-----------------|------------|----------------|-----------|------------|---------------|---------------|---------------|-----------|------|
| $5d^2D_{5/2}$ | $4f^2F_{7/2}$ | 674.14          | 1.871e-01  |                | 4.153e-01 | 4.208e-01  |               |               | 4.005e-01     | 4.577e+08 | B+   |
| $5f^2F_{5/2}$ | $3d^2D_{3/2}$ | 184.09          | 6.573e-01  |                | 3.984e-01 | 4.282e-01  | 4.100e-01     |               | 4.173e-01     | 2.156e+10 | B    |
| $5f^2F_{5/2}$ | $4d^2D_{3/2}$ | 561.79          | 2.671e+00  | 2.687e+00      | 4.939e+00 | 5.084e+00  |               |               | 5.060e+00     | 9.408e+09 | B+   |
| $5f^2F_{5/2}$ | $5d^2D_{3/2}$ | 9880.92         | 1.073e+00  |                | 3.491e+01 | 3.484e+01  |               |               | 3.507e+01     | 1.222e+07 | D+   |
| $5f^2F_{5/2}$ | $3d^2D_{5/2}$ | 184.13          | 4.703e-02  |                | 2.851e-02 | 3.058e-02  |               |               | 2.987e-02     | 1.542e+09 | C+   |
| $5f^2F_{5/2}$ | $4d^2D_{5/2}$ | 561.96          | 1.911e-01  | 1.922e-01      | 3.535e-01 | 3.636e-01  |               |               | 3.625e-01     | 6.726e+08 | B+   |
| $5f^2F_{7/2}$ | $3d^2D_{5/2}$ | 184.12          | 9.408e-01  |                | 5.702e-01 | 6.118e-01  | 5.900e-01     |               | 5.974e-01     | 2.314e+10 | B    |
| $5f^2F_{7/2}$ | $4d^2D_{5/2}$ | 561.92          | 3.820e+00  | 3.842e+00      | 7.066e+00 | 7.269e+00  |               |               | 7.229e+00     | 1.009e+10 | B+   |
| $5f^2F_{7/2}$ | $5d^2D_{5/2}$ | 9894.52         | 1.531e+00  |                | 4.986e+01 | 4.977e+01  |               |               | 4.991e+01     | 1.304e+07 | D+   |
| $5g^2G_{7/2}$ | $4f^2F_{5/2}$ | 628.17          | 7.980e+00  |                | 1.650e+01 | 1.670e+01  |               |               | 1.670e+01     | 1.686e+10 | B+   |
| $5g^2G_{7/2}$ | $4f^2F_{7/2}$ | 628.29          | 2.956e-01  |                | 6.114e-01 | 6.186e-01  |               |               | 6.178e-01     | 6.243e+08 | B+   |
| $5g^2G_{9/2}$ | $4f^2F_{7/2}$ | 628.25          | 1.035e+01  |                | 2.140e+01 | 2.165e+01  |               |               | 2.162e+01     | 1.748e+10 | B+   |
| $5p^2P_{1/2}$ | $3s^2S_{1/2}$ | 120.03          | 2.999e-02  | 2.926e-02      | 1.185e-02 | 1.176e-02  | 9.900e-03     |               | 1.041e-02     | 6.942e+09 | C+   |
| $5p^2P_{1/2}$ | $4s^2S_{1/2}$ | 390.04          | 7.942e-02  | 7.834e-02      | 1.020e-01 | 1.013e-01  |               |               | 9.638e-02     | 1.741e+09 | B    |
| $5p^2P_{1/2}$ | $5s^2S_{1/2}$ | 4011.45         | 7.339e-01  | 7.380e-01      | 9.693e+00 | 9.714e+00  |               |               | 9.817e+00     | 1.521e+08 | C+   |
| $5p^2P_{1/2}$ | $3d^2D_{3/2}$ | 199.99          | 3.507e-02  | 3.503e-02      | 2.309e-02 | 2.370e-02  |               |               | 2.201e-02     | 2.925e+09 | C+   |
| $5p^2P_{1/2}$ | $4d^2D_{3/2}$ | 741.74          | 5.536e-01  | 5.528e-01      | 1.352e+00 | 1.368e+00  |               |               | 1.355e+00     | 3.356e+09 | B+   |
| $5p^2P_{3/2}$ | $3s^2S_{1/2}$ | 119.96          | 5.830e-02  | 5.680e-02      | 2.302e-02 | 2.282e-02  |               |               | 2.040e-02     | 6.757e+09 | C+   |
| $5p^2P_{3/2}$ | $4s^2S_{1/2}$ | 389.31          | 1.520e-01  | 1.496e-01      | 1.948e-01 | 1.935e-01  |               |               | 1.859e-01     | 1.673e+09 | B+   |
| $5p^2P_{3/2}$ | $5s^2S_{1/2}$ | 3935.02         | 1.496e+00  | 1.504e+00      | 1.939e+01 | 1.943e+01  |               |               | 1.961e+01     | 1.612e+08 | C+   |
| $5p^2P_{3/2}$ | $3d^2D_{3/2}$ | 199.80          | 6.953e-03  | 6.940e-03      | 4.573e-03 | 4.695e-03  |               |               | 4.357e-03     | 2.904e+08 | C+   |
| $5p^2P_{3/2}$ | $4d^2D_{3/2}$ | 739.08          | 1.091e-01  | 1.088e-01      | 2.654e-01 | 2.686e-01  |               |               | 2.667e-01     | 3.329e+08 | B+   |
| $5p^2P_{3/2}$ | $3d^2D_{5/2}$ | 199.84          | 6.320e-02  | 6.252e-02      | 4.158e-02 | 4.224e-02  |               |               | 3.945e-02     | 2.639e+09 | B    |
| $5p^2P_{3/2}$ | $4d^2D_{5/2}$ | 739.39          | 9.845e-01  | 9.816e-01      | 2.396e+00 | 2.421e+00  |               |               | 2.405e+00     | 3.003e+09 | B+   |
| $5s^2S_{1/2}$ | $3p^2P_{1/2}$ | 149.64          | 3.232e-02  | 3.216e-02      | 1.592e-02 | 1.641e-02  |               |               | 1.468e-02     | 4.815e+09 | C+   |
| $5s^2S_{1/2}$ | $4p^2P_{1/2}$ | 557.72          | 2.973e-01  | 2.990e-01      | 5.459e-01 | 5.597e-01  |               |               | 5.446e-01     | 3.188e+09 | B+   |
| $5s^2S_{1/2}$ | $3p^2P_{3/2}$ | 150.25          | 6.564e-02  | 6.540e-02      | 3.247e-02 | 3.343e-02  |               |               | 3.031e-02     | 9.698e+09 | C+   |
| $5s^2S_{1/2}$ | $4p^2P_{3/2}$ | 560.88          | 6.062e-01  | 6.100e-01      | 1.119e+00 | 1.147e+00  |               |               | 1.115e+00     | 6.426e+09 | B+   |
| $6d^2D_{3/2}$ | $3p^2P_{1/2}$ | 122.45          | 5.614e-02  |                | 2.263e-02 | 2.534e-02  |               |               | 2.063e-02     | 6.243e+09 | C+   |
| $6d^2D_{3/2}$ | $4p^2P_{1/2}$ | 305.17          | 8.384e-02  |                | 8.423e-02 | 9.187e-02  |               |               | 7.894e-02     | 1.501e+09 | B    |
| $6d^2D_{3/2}$ | $5p^2P_{1/2}$ | 810.03          | 1.346e-01  |                | 3.590e-01 | 3.854e-01  |               |               | 3.445e-01     | 3.421e+08 | B    |
| $6d^2D_{3/2}$ | $6p^2P_{1/2}$ | 5445.62         | 2.591e+00  |                | 4.645e+01 | 4.641e+01  |               |               | 4.691e+01     | 1.457e+08 | C    |
| $6d^2D_{3/2}$ | $3p^2P_{3/2}$ | 122.86          | 1.142e-02  |                | 4.619e-03 | 5.166e-03  |               |               | 4.386e-03     | 1.262e+09 | C+   |
| $6d^2D_{3/2}$ | $4p^2P_{3/2}$ | 306.12          | 1.726e-02  |                | 1.740e-02 | 1.894e-02  |               |               | 1.678e-02     | 3.072e+08 | C+   |
| $6d^2D_{3/2}$ | $5p^2P_{3/2}$ | 813.22          | 2.837e-02  |                | 7.596e-02 | 8.137e-02  |               |               | 7.424e-02     | 7.154e+07 | B    |
| $6d^2D_{3/2}$ | $6p^2P_{3/2}$ | 5526.63         | 5.122e-01  |                | 9.320e+00 | 9.310e+00  |               |               | 9.360e+00     | 2.797e+07 | C    |
| $6d^2D_{3/2}$ | $4f^2F_{5/2}$ | 418.89          | 2.112e-02  |                | 2.913e-02 | 3.349e-02  |               |               | 2.807e-02     | 2.007e+08 | C+   |
| $6d^2D_{3/2}$ | $5f^2F_{5/2}$ | 1245.82         | 3.171e-01  |                | 1.301e+00 | 1.324e+00  |               |               | 1.267e+00     | 3.407e+08 | B+   |
| $6d^2D_{5/2}$ | $3p^2P_{3/2}$ | 122.86          | 1.041e-01  |                | 4.209e-02 | 4.640e-02  |               |               | 3.964e-02     | 7.664e+09 | C+   |

Table S1 – continued from previous page

| Upper level     | Lower level    | $\lambda$ [RCI] | $gf$ [RCI] | $gf$ Ref. [17] | $S$ [RCI] | $S$ [MBPT] | $S$ Ref. [48] | $S$ Ref. [20] | $S$ Ref. [22] | $A$ [RCI] | Unc. |
|-----------------|----------------|-----------------|------------|----------------|-----------|------------|---------------|---------------|---------------|-----------|------|
| $6d^2 D_{5/2}$  | $4p^2 P_{3/2}$ | 306.10          | 1.569e-01  |                | 1.581e-01 | 1.700e-01  |               |               | 1.511e-01     | 1.862e+09 | B    |
| $6d^2 D_{5/2}$  | $5p^2 P_{3/2}$ | 813.12          | 2.569e-01  |                | 6.878e-01 | 7.287e-01  |               |               | 6.647e-01     | 4.320e+08 | B+   |
| $6d^2 D_{5/2}$  | $6p^2 P_{3/2}$ | 5521.98         | 4.606e+00  |                | 8.373e+01 | 8.379e+01  |               |               | 8.432e+01     | 1.679e+08 | C    |
| $6d^2 D_{5/2}$  | $4f^2 F_{5/2}$ | 418.86          | 1.519e-03  |                | 2.094e-03 | 2.386e-03  |               |               | 2.004e-03     | 9.624e+06 | C+   |
| $6d^2 D_{5/2}$  | $5f^2 F_{5/2}$ | 1245.59         | 2.272e-02  |                | 9.317e-02 | 9.433e-02  |               |               | 9.005e-02     | 1.628e+07 | B    |
| $6d^2 D_{5/2}$  | $4f^2 F_{7/2}$ | 418.92          | 3.041e-02  |                | 4.193e-02 | 4.776e-02  |               |               | 4.014e-02     | 1.926e+08 | C+   |
| $6d^2 D_{5/2}$  | $5f^2 F_{7/2}$ | 1245.82         | 4.549e-01  |                | 1.866e+00 | 1.889e+00  |               |               | 1.808e+00     | 3.259e+08 | B+   |
| $6f^2 F_{5/2}$  | $3d^2 D_{3/2}$ | 158.89          | 2.400e-01  |                | 1.256e-01 | 1.415e-01  |               |               | 1.333e-01     | 1.057e+10 | C+   |
| $6f^2 F_{5/2}$  | $4d^2 D_{3/2}$ | 378.59          | 6.845e-01  |                | 8.532e-01 | 9.002e-01  |               |               | 8.714e-01     | 5.310e+09 | B+   |
| $6f^2 F_{5/2}$  | $5d^2 D_{3/2}$ | 1038.89         | 2.291e+00  |                | 7.837e+00 | 8.111e+00  |               |               | 8.040e+00     | 2.360e+09 | B+   |
| $6f^2 F_{5/2}$  | $6d^2 D_{3/2}$ | 17042.46        | 1.501e+00  |                | 8.424e+01 | 8.377e+01  |               |               | 8.429e+01     | 5.747e+06 | E    |
| $6f^2 F_{5/2}$  | $3d^2 D_{5/2}$ | 158.92          | 1.736e-02  |                | 9.082e-03 | 1.010e-02  |               |               | 9.556e-03     | 7.641e+08 | C+   |
| $6f^2 F_{5/2}$  | $4d^2 D_{5/2}$ | 378.67          | 4.933e-02  |                | 6.149e-02 | 6.432e-02  |               |               | 6.241e-02     | 3.824e+08 | B    |
| $6f^2 F_{5/2}$  | $5d^2 D_{5/2}$ | 1039.20         | 1.646e-01  |                | 5.633e-01 | 5.804e-01  |               |               | 5.752e-01     | 1.695e+08 | B+   |
| $6f^2 F_{5/2}$  | $5g^2 G_{7/2}$ | 1170.93         | 6.287e-02  |                | 2.423e-01 | 2.388e-01  |               |               | 2.350e-01     | 5.097e+07 | B    |
| $6f^2 F_{7/2}$  | $3d^2 D_{5/2}$ | 158.92          | 3.473e-01  |                | 1.817e-01 | 2.021e-01  |               |               | 1.908e-01     | 1.147e+10 | C+   |
| $6f^2 F_{7/2}$  | $4d^2 D_{5/2}$ | 378.66          | 9.864e-01  |                | 1.230e+00 | 1.286e+00  |               |               | 1.248e+00     | 5.736e+09 | B+   |
| $6f^2 F_{7/2}$  | $5d^2 D_{5/2}$ | 1039.11         | 3.291e+00  |                | 1.126e+01 | 1.160e+01  |               |               | 1.150e+01     | 2.541e+09 | B+   |
| $6f^2 F_{7/2}$  | $6d^2 D_{5/2}$ | 17061.77        | 2.136e+00  |                | 1.200e+02 | 1.197e+02  |               |               | 1.203e+02     | 6.119e+06 | E    |
| $6f^2 F_{7/2}$  | $5g^2 G_{9/2}$ | 1170.95         | 8.144e-02  |                | 3.139e-01 | 3.094e-01  |               |               | 3.045e-01     | 4.952e+07 | B    |
| $6g^2 G_{7/2}$  | $4f^2 F_{5/2}$ | 408.05          | 1.093e+00  |                | 1.468e+00 | 1.491e+00  |               |               | 1.482e+00     | 5.472e+09 | B+   |
| $6g^2 G_{7/2}$  | $5f^2 F_{5/2}$ | 1154.62         | 6.983e+00  |                | 2.654e+01 | 2.688e+01  |               |               | 2.680e+01     | 4.368e+09 | B+   |
| $6g^2 G_{7/2}$  | $4f^2 F_{7/2}$ | 408.10          | 4.046e-02  |                | 5.435e-02 | 5.521e-02  |               |               | 5.483e-02     | 2.025e+08 | B    |
| $6g^2 G_{7/2}$  | $5f^2 F_{7/2}$ | 1154.82         | 2.587e-01  |                | 9.836e-01 | 9.960e-01  |               |               | 9.941e-01     | 1.617e+08 | B+   |
| $6g^2 G_{9/2}$  | $4f^2 F_{7/2}$ | 408.09          | 1.416e+00  |                | 1.903e+00 | 1.933e+00  |               |               | 1.921e+00     | 5.673e+09 | B+   |
| $6g^2 G_{9/2}$  | $5f^2 F_{7/2}$ | 1154.75         | 9.054e+00  |                | 3.442e+01 | 3.485e+01  |               |               | 3.474e+01     | 4.529e+09 | B+   |
| $6h^2 H_{11/2}$ | $5g^2 G_{9/2}$ | 1163.84         | 1.642e+01  |                | 6.292e+01 | 6.311e+01  |               |               | 6.309e+01     | 6.739e+09 | B+   |
| $6h^2 H_{9/2}$  | $5g^2 G_{7/2}$ | 1163.76         | 1.338e+01  |                | 5.127e+01 | 5.142e+01  |               |               | 5.139e+01     | 6.590e+09 | B+   |
| $6h^2 H_{9/2}$  | $5g^2 G_{9/2}$ | 1163.89         | 3.041e-01  |                | 1.165e+00 | 1.169e+00  |               |               | 1.170e+00     | 1.497e+08 | B+   |
| $6p^2 P_{1/2}$  | $3s^2 S_{1/2}$ | 106.58          | 1.422e-02  |                | 4.991e-03 | 5.267e-03  |               |               | 4.024e-03     | 4.176e+09 | C+   |
| $6p^2 P_{1/2}$  | $4s^2 S_{1/2}$ | 276.65          | 2.933e-02  |                | 2.671e-02 | 2.799e-02  |               |               | 2.385e-02     | 1.278e+09 | C+   |
| $6p^2 P_{1/2}$  | $5s^2 S_{1/2}$ | 769.13          | 7.931e-02  |                | 2.008e-01 | 2.029e-01  |               |               | 1.887e-01     | 4.471e+08 | B    |
| $6p^2 P_{1/2}$  | $6s^2 S_{1/2}$ | 7252.49         | 9.015e-01  |                | 2.152e+01 | 2.151e+01  |               |               | 2.178e+01     | 5.716e+07 | D+   |
| $6p^2 P_{1/2}$  | $3d^2 D_{3/2}$ | 165.26          | 1.183e-02  |                | 6.438e-03 | 7.158e-03  |               |               | 5.993e-03     | 1.445e+09 | C+   |
| $6p^2 P_{1/2}$  | $4d^2 D_{3/2}$ | 416.83          | 7.629e-02  |                | 1.047e-01 | 1.113e-01  |               |               | 1.029e-01     | 1.465e+09 | B    |
| $6p^2 P_{1/2}$  | $5d^2 D_{3/2}$ | 1388.40         | 8.570e-01  |                | 3.917e+00 | 3.969e+00  |               |               | 3.929e+00     | 1.483e+09 | B+   |
| $6p^2 P_{3/2}$  | $3s^2 S_{1/2}$ | 106.55          | 2.774e-02  |                | 9.732e-03 | 1.026e-02  |               |               | 7.969e-03     | 4.075e+09 | C+   |
| $6p^2 P_{3/2}$  | $4s^2 S_{1/2}$ | 276.44          | 5.672e-02  |                | 5.162e-02 | 5.411e-02  |               |               | 4.676e-02     | 1.238e+09 | B    |
| $6p^2 P_{3/2}$  | $5s^2 S_{1/2}$ | 767.54          | 1.511e-01  |                | 3.819e-01 | 3.861e-01  |               |               | 3.626e-01     | 4.278e+08 | B+   |

Table S1 – continued from previous page

| Upper level   | Lower level   | $\lambda$ [RCI] | $gf$ [RCI] | $gf$ Ref. [17] | $S$ [RCI] | $S$ [MBPT] | $S$ Ref. [48] | $S$ Ref. [20] | $S$ Ref. [22] | $A$ [RCI] | Unc. |
|---------------|---------------|-----------------|------------|----------------|-----------|------------|---------------|---------------|---------------|-----------|------|
| $6p^2P_{3/2}$ | $6s^2S_{1/2}$ | 7113.61         | 1.837e+00  | 4.303e+01      | 4.299e+01 |            |               |               | 4.349e+01     | 6.055e+07 | D+   |
| $6p^2P_{3/2}$ | $3d^2D_{3/2}$ | 165.18          | 2.347e-03  | 1.276e-03      | 1.422e-03 |            |               |               | 1.197e-03     | 1.434e+08 | C    |
| $6p^2P_{3/2}$ | $4d^2D_{3/2}$ | 416.36          | 1.513e-02  | 2.073e-02      | 2.205e-02 |            |               |               | 2.066e-02     | 1.455e+08 | C+   |
| $6p^2P_{3/2}$ | $5d^2D_{3/2}$ | 1383.23         | 1.689e-01  | 7.691e-01      | 7.797e-01 |            |               |               | 7.727e-01     | 1.472e+08 | B    |
| $6p^2P_{3/2}$ | $3d^2D_{5/2}$ | 165.21          | 2.175e-02  | 1.183e-02      | 1.277e-02 |            |               |               | 1.080e-02     | 1.329e+09 | C+   |
| $6p^2P_{3/2}$ | $4d^2D_{5/2}$ | 416.46          | 1.378e-01  | 1.889e-01      | 1.985e-01 |            |               |               | 1.866e-01     | 1.325e+09 | B+   |
| $6p^2P_{3/2}$ | $5d^2D_{5/2}$ | 1383.79         | 1.526e+00  | 6.952e+00      | 7.029e+00 |            |               |               | 7.002e+00     | 1.329e+09 | B+   |
| $6s^2S_{1/2}$ | $3p^2P_{1/2}$ | 127.47          | 1.235e-02  | 5.183e-03      | 5.699e-03 |            |               |               | 4.491e-03     | 2.535e+09 | C+   |
| $6s^2S_{1/2}$ | $4p^2P_{1/2}$ | 338.37          | 5.285e-02  | 5.887e-02      | 6.255e-02 |            |               |               | 5.658e-02     | 1.539e+09 | B    |
| $6s^2S_{1/2}$ | $5p^2P_{1/2}$ | 1095.28         | 4.217e-01  | 1.521e+00      | 1.566e+00 |            |               |               | 1.512e+00     | 1.172e+09 | B+   |
| $6s^2S_{1/2}$ | $3p^2P_{3/2}$ | 127.91          | 2.504e-02  | 1.055e-02      | 1.156e-02 |            |               |               | 9.487e-03     | 5.105e+09 | C+   |
| $6s^2S_{1/2}$ | $4p^2P_{3/2}$ | 339.53          | 1.071e-01  | 1.197e-01      | 1.270e-01 |            |               |               | 1.162e-01     | 3.098e+09 | B    |
| $6s^2S_{1/2}$ | $5p^2P_{3/2}$ | 1101.12         | 8.588e-01  | 3.113e+00      | 3.203e+00 |            |               |               | 3.107e+00     | 2.362e+09 | B+   |
| $7d^2D_{3/2}$ | $3p^2P_{1/2}$ | 114.84          | 3.530e-02  | 1.335e-02      | 1.489e-02 |            |               |               | 4.463e+09     | 4.463e+09 | C+   |
| $7d^2D_{3/2}$ | $4p^2P_{1/2}$ | 261.92          | 4.976e-02  | 4.291e-02      | 4.574e-02 |            |               |               | 1.210e+09     | 1.210e+09 | B    |
| $7d^2D_{3/2}$ | $5p^2P_{1/2}$ | 563.18          | 8.030e-02  | 1.489e-01      | 1.452e-01 |            |               |               | 4.222e+08     | 4.222e+08 | B    |
| $7d^2D_{3/2}$ | $6p^2P_{1/2}$ | 1379.82         | 1.265e-01  | 5.746e-01      | 5.643e-01 |            |               |               | 1.108e+08     | 1.108e+08 | B    |
| $7d^2D_{3/2}$ | $7p^2P_{1/2}$ | 8883.27         | 2.876e+00  | 8.410e+01      | 8.889e+01 |            |               |               | 6.077e+07     | 6.077e+07 | D+   |
| $7d^2D_{3/2}$ | $3p^2P_{3/2}$ | 115.20          | 7.038e-03  | 2.669e-03      | 3.025e-03 |            |               |               | 8.844e+08     | 8.844e+08 | C+   |
| $7d^2D_{3/2}$ | $4p^2P_{3/2}$ | 262.62          | 1.138e-02  | 9.837e-03      | 9.372e-03 |            |               |               | 2.751e+08     | 2.751e+08 | C+   |
| $7d^2D_{3/2}$ | $5p^2P_{3/2}$ | 564.72          | 1.749e-02  | 3.252e-02      | 3.009e-02 |            |               |               | 9.146e+07     | 9.146e+07 | C+   |
| $7d^2D_{3/2}$ | $6p^2P_{3/2}$ | 1384.97         | 2.302e-02  | 1.050e-01      | 1.200e-01 |            |               |               | 2.001e+07     | 2.001e+07 | C+   |
| $7d^2D_{3/2}$ | $7p^2P_{3/2}$ | 9015.42         | 5.489e-01  | 1.629e+01      | 1.784e+01 |            |               |               | 1.126e+07     | 1.126e+07 | D+   |
| $7d^2D_{3/2}$ | $4f^2F_{5/2}$ | 341.49          | 1.090e-02  | 1.226e-02      | 1.151e-02 |            |               |               | 1.559e+08     | 1.559e+08 | C+   |
| $7d^2D_{3/2}$ | $5f^2F_{5/2}$ | 744.17          | 6.465e-02  | 1.584e-01      | 1.493e-01 |            |               |               | 1.947e+08     | 1.947e+08 | B    |
| $7d^2D_{3/2}$ | $6f^2F_{5/2}$ | 2072.88         | 5.574e-01  | 3.804e+00      | 3.730e+00 |            |               |               | 2.163e+08     | 2.163e+08 | B    |
| $7d^2D_{5/2}$ | $3p^2P_{3/2}$ | 115.20          | 5.948e-02  | 2.256e-02      | 2.716e-02 |            |               |               | 4.983e+09     | 4.983e+09 | C    |
| $7d^2D_{5/2}$ | $4p^2P_{3/2}$ | 262.61          | 8.377e-02  | 7.242e-02      | 8.411e-02 |            |               |               | 1.350e+09     | 1.350e+09 | C+   |
| $7d^2D_{5/2}$ | $5p^2P_{3/2}$ | 564.68          | 1.294e-01  | 2.405e-01      | 2.698e-01 |            |               |               | 4.510e+08     | 4.510e+08 | C+   |
| $7d^2D_{5/2}$ | $6p^2P_{3/2}$ | 1384.73         | 2.156e-01  | 9.828e-01      | 1.074e+00 |            |               |               | 1.250e+08     | 1.250e+08 | C+   |
| $7d^2D_{5/2}$ | $7p^2P_{3/2}$ | 9005.35         | 5.422e+00  | 1.608e+02      | 1.605e+02 |            |               |               | 7.433e+07     | 7.433e+07 | D+   |
| $7d^2D_{5/2}$ | $4f^2F_{5/2}$ | 341.47          | 5.231e-04  | 5.881e-04      | 8.202e-04 |            |               |               | 4.987e+06     | 4.987e+06 | D+   |
| $7d^2D_{5/2}$ | $5f^2F_{5/2}$ | 744.10          | 3.874e-03  | 9.489e-03      | 1.064e-02 |            |               |               | 7.778e+06     | 7.778e+06 | C+   |
| $7d^2D_{5/2}$ | $6f^2F_{5/2}$ | 2072.35         | 3.836e-02  | 2.617e-01      | 2.657e-01 |            |               |               | 9.930e+06     | 9.930e+06 | C+   |
| $7d^2D_{5/2}$ | $4f^2F_{7/2}$ | 341.51          | 1.047e-02  | 1.177e-02      | 1.641e-02 |            |               |               | 9.979e+07     | 9.979e+07 | D+   |
| $7d^2D_{5/2}$ | $5f^2F_{7/2}$ | 744.18          | 7.755e-02  | 1.900e-01      | 2.129e-01 |            |               |               | 1.557e+08     | 1.557e+08 | C+   |
| $7d^2D_{5/2}$ | $6f^2F_{7/2}$ | 2072.72         | 7.680e-01  | 5.240e+00      | 5.320e+00 |            |               |               | 1.987e+08     | 1.987e+08 | B    |
| $7f^2F_{5/2}$ | $3d^2D_{3/2}$ | 146.78          | 1.296e-01  | 6.265e-02      | 6.715e-02 |            |               |               | 6.690e+09     | 6.690e+09 | B    |
| $7f^2F_{5/2}$ | $4d^2D_{3/2}$ | 316.38          | 3.108e-01  | 3.237e-01      | 3.268e-01 |            |               |               | 3.451e+09     | 3.451e+09 | B+   |

Table S1 – continued from previous page

| Upper level      | Lower level      | $\lambda$ [RCI] | $gf$ [RCI] | $gf$ Ref. [17] | $S$ [RCI] | $S$ [MBPT] | $S$ Ref. [48] | $S$ Ref. [20] | $S$ Ref. [22] | $A$ [RCI] | Unc. |
|------------------|------------------|-----------------|------------|----------------|-----------|------------|---------------|---------------|---------------|-----------|------|
| $7f\ ^2F_{5/2}$  | $5d\ ^2D_{3/2}$  | 674.78          | 7.015e-01  |                | 1.558e+00 | 1.548e+00  |               |               |               | 1.713e+09 | B+   |
| $7f\ ^2F_{5/2}$  | $6d\ ^2D_{3/2}$  | 1729.89         | 2.217e+00  |                | 1.262e+01 | 1.250e+01  |               |               |               | 8.235e+08 | B    |
| $7f\ ^2F_{5/2}$  | $3d\ ^2D_{5/2}$  | 146.81          | 8.502e-03  |                | 4.109e-03 | 4.792e-03  |               |               |               | 4.386e+08 | C+   |
| $7f\ ^2F_{5/2}$  | $4d\ ^2D_{5/2}$  | 316.43          | 2.070e-02  |                | 2.156e-02 | 2.334e-02  |               |               |               | 2.298e+08 | C+   |
| $7f\ ^2F_{5/2}$  | $5d\ ^2D_{5/2}$  | 674.92          | 4.739e-02  |                | 1.053e-01 | 1.107e-01  |               |               |               | 1.156e+08 | B    |
| $7f\ ^2F_{5/2}$  | $6d\ ^2D_{5/2}$  | 1730.35         | 1.517e-01  |                | 8.642e-01 | 8.949e-01  |               |               |               | 5.633e+07 | B    |
| $7f\ ^2F_{5/2}$  | $5g\ ^2G_{7/2}$  | 728.11          | 9.914e-03  |                | 2.376e-02 | 2.500e-02  |               |               |               | 2.079e+07 | C+   |
| $7f\ ^2F_{5/2}$  | $6g\ ^2G_{7/2}$  | 1943.00         | 1.683e-01  |                | 1.077e+00 | 1.063e+00  |               |               |               | 4.957e+07 | B    |
| $7f\ ^2F_{7/2}$  | $3d\ ^2D_{5/2}$  | 146.80          | 1.701e-01  |                | 8.221e-02 | 9.587e-02  |               |               |               | 6.581e+09 | C+   |
| $7f\ ^2F_{7/2}$  | $4d\ ^2D_{5/2}$  | 316.43          | 4.140e-01  |                | 4.313e-01 | 4.668e-01  |               |               |               | 3.448e+09 | B    |
| $7f\ ^2F_{7/2}$  | $5d\ ^2D_{5/2}$  | 674.89          | 9.474e-01  |                | 2.105e+00 | 2.213e+00  |               |               |               | 1.734e+09 | B+   |
| $7f\ ^2F_{7/2}$  | $6d\ ^2D_{5/2}$  | 1730.19         | 3.032e+00  |                | 1.727e+01 | 1.788e+01  |               |               |               | 8.445e+08 | B    |
| $7f\ ^2F_{7/2}$  | $7d\ ^2D_{5/2}$  | 27098.71        | 2.695e+00  |                | 2.404e+02 | 2.394e+02  |               |               |               | 3.060e+06 | E    |
| $7f\ ^2F_{7/2}$  | $5g\ ^2G_{9/2}$  | 728.14          | 1.284e-02  |                | 3.079e-02 | 3.239e-02  |               |               |               | 2.020e+07 | C+   |
| $7f\ ^2F_{7/2}$  | $6g\ ^2G_{9/2}$  | 1943.00         | 2.181e-01  |                | 1.395e+00 | 1.377e+00  |               |               |               | 4.816e+07 | B    |
| $7g\ ^2G_{7/2}$  | $4f\ ^2F_{5/2}$  | 336.87          | 3.502e-01  |                | 3.884e-01 | 4.000e-01  |               |               |               | 2.573e+09 | B+   |
| $7g\ ^2G_{7/2}$  | $5f\ ^2F_{5/2}$  | 722.60          | 1.370e+00  |                | 3.258e+00 | 3.305e+00  |               |               |               | 2.187e+09 | B+   |
| $7g\ ^2G_{7/2}$  | $6f\ ^2F_{5/2}$  | 1913.73         | 6.491e+00  |                | 4.089e+01 | 4.153e+01  |               |               |               | 1.478e+09 | B    |
| $7g\ ^2G_{7/2}$  | $4f\ ^2F_{7/2}$  | 336.91          | 1.296e-02  |                | 1.438e-02 | 1.481e-02  |               |               |               | 9.523e+07 | C+   |
| $7g\ ^2G_{7/2}$  | $5f\ ^2F_{7/2}$  | 722.67          | 5.072e-02  |                | 1.207e-01 | 1.224e-01  |               |               |               | 8.097e+07 | B    |
| $7g\ ^2G_{7/2}$  | $6f\ ^2F_{7/2}$  | 1914.04         | 2.405e-01  |                | 1.515e+00 | 1.539e+00  |               |               |               | 5.474e+07 | B    |
| $7g\ ^2G_{7/2}$  | $6h\ ^2H_{9/2}$  | 1933.21         | 6.223e-02  |                | 3.961e-01 | 3.937e-01  |               |               |               | 1.388e+07 | C+   |
| $7g\ ^2G_{9/2}$  | $4f\ ^2F_{7/2}$  | 336.90          | 4.539e-01  |                | 5.035e-01 | 5.185e-01  |               |               |               | 2.668e+09 | B+   |
| $7g\ ^2G_{9/2}$  | $5f\ ^2F_{7/2}$  | 722.66          | 1.775e+00  |                | 4.224e+00 | 4.284e+00  |               |               |               | 2.268e+09 | B+   |
| $7g\ ^2G_{9/2}$  | $6f\ ^2F_{7/2}$  | 1913.92         | 8.416e+00  |                | 5.302e+01 | 5.385e+01  |               |               |               | 1.532e+09 | B    |
| $7g\ ^2G_{9/2}$  | $6h\ ^2H_{11/2}$ | 1933.22         | 7.635e-02  |                | 4.859e-01 | 4.830e-01  |               |               |               | 1.363e+07 | C+   |
| $7h\ ^2H_{11/2}$ | $5g\ ^2G_{9/2}$  | 726.29          | 1.976e+00  |                | 4.725e+00 | 4.743e+00  |               |               |               | 2.082e+09 | B+   |
| $7h\ ^2H_{11/2}$ | $6g\ ^2G_{9/2}$  | 1929.91         | 1.462e+01  |                | 9.287e+01 | 9.316e+01  |               |               |               | 2.181e+09 | B    |
| $7h\ ^2H_{9/2}$  | $5g\ ^2G_{7/2}$  | 726.25          | 1.610e+00  |                | 3.850e+00 | 3.865e+00  |               |               |               | 2.036e+09 | B+   |
| $7h\ ^2H_{9/2}$  | $6g\ ^2G_{7/2}$  | 1929.80         | 1.191e+01  |                | 7.566e+01 | 7.590e+01  |               |               |               | 2.133e+09 | B    |
| $7h\ ^2H_{9/2}$  | $5g\ ^2G_{9/2}$  | 726.30          | 3.659e-02  |                | 8.748e-02 | 8.782e-02  |               |               |               | 4.626e+07 | B    |
| $7h\ ^2H_{9/2}$  | $6g\ ^2G_{9/2}$  | 1930.00         | 2.707e-01  |                | 1.720e+00 | 1.725e+00  |               |               |               | 4.847e+07 | B    |
| $7i\ ^2I_{11/2}$ | $6h\ ^2H_{9/2}$  | 1931.43         | 2.006e+01  |                | 1.276e+02 | 1.277e+02  |               |               |               | 2.989e+09 | B    |
| $7i\ ^2I_{11/2}$ | $6h\ ^2H_{11/2}$ | 1931.56         | 3.087e-01  |                | 1.963e+00 | 1.965e+00  |               |               |               | 4.599e+07 | B    |
| $7i\ ^2I_{13/2}$ | $6h\ ^2H_{11/2}$ | 1931.50         | 2.377e+01  |                | 1.511e+02 | 1.513e+02  |               |               |               | 3.035e+09 | B    |
| $7p\ ^2P_{1/2}$  | $3s\ ^2S_{1/2}$  | 100.05          | 7.839e-03  |                | 2.582e-03 | 3.021e-03  |               |               |               | 2.612e+09 | C+   |
| $7p\ ^2P_{1/2}$  | $4s\ ^2S_{1/2}$  | 236.58          | 1.420e-02  |                | 1.106e-02 | 1.273e-02  |               |               |               | 8.461e+08 | C+   |
| $7p\ ^2P_{1/2}$  | $5s\ ^2S_{1/2}$  | 522.92          | 2.968e-02  |                | 5.110e-02 | 5.567e-02  |               |               |               | 3.620e+08 | B    |
| $7p\ ^2P_{1/2}$  | $6s\ ^2S_{1/2}$  | 1333.26         | 8.120e-02  |                | 3.564e-01 | 3.655e-01  |               |               |               | 1.524e+08 | B    |

Table S1 – continued from previous page

| Upper level   | Lower level   | $\lambda$ [RCI] | $gf$ [RCI] | $gf$ Ref. [17] | $S$ [RCI] | $S$ [MBPT] | $S$ Ref. [48] | $S$ Ref. [20] | $S$ Ref. [22] | $A$ [RCI] | Unc. |
|---------------|---------------|-----------------|------------|----------------|-----------|------------|---------------|---------------|---------------|-----------|------|
| $7p^2P_{1/2}$ | $7s^2S_{1/2}$ | 11878.84        | 1.068e+00  |                | 4.176e+01 | 4.160e+01  |               |               |               | 2.524e+07 | E    |
| $7p^2P_{1/2}$ | $3d^2D_{3/2}$ | 150.08          | 7.692e-03  |                | 3.800e-03 | 3.407e-03  |               |               |               | 1.139e+09 | C+   |
| $7p^2P_{1/2}$ | $4d^2D_{3/2}$ | 332.09          | 3.197e-02  |                | 3.495e-02 | 3.315e-02  |               |               |               | 9.668e+08 | B    |
| $7p^2P_{1/2}$ | $5d^2D_{3/2}$ | 750.52          | 1.342e-01  |                | 3.315e-01 | 3.183e-01  |               |               |               | 7.944e+08 | B+   |
| $7p^2P_{1/2}$ | $6d^2D_{3/2}$ | 2333.58         | 1.220e+00  |                | 9.374e+00 | 9.108e+00  |               |               |               | 7.473e+08 | C+   |
| $7p^2P_{3/2}$ | $3s^2S_{1/2}$ | 100.04          | 1.531e-02  |                | 5.043e-03 | 5.896e-03  |               |               |               | 2.552e+09 | C+   |
| $7p^2P_{3/2}$ | $4s^2S_{1/2}$ | 236.49          | 2.756e-02  |                | 2.146e-02 | 2.472e-02  |               |               |               | 8.217e+08 | C+   |
| $7p^2P_{3/2}$ | $5s^2S_{1/2}$ | 522.47          | 5.721e-02  |                | 9.840e-02 | 1.073e-01  |               |               |               | 3.495e+08 | B    |
| $7p^2P_{3/2}$ | $6s^2S_{1/2}$ | 1330.33         | 1.542e-01  |                | 6.755e-01 | 6.935e-01  |               |               |               | 1.453e+08 | B    |
| $7p^2P_{3/2}$ | $7s^2S_{1/2}$ | 11650.48        | 2.176e+00  |                | 8.344e+01 | 8.314e+01  |               |               |               | 2.673e+07 | E    |
| $7p^2P_{3/2}$ | $3d^2D_{3/2}$ | 150.04          | 1.529e-03  |                | 7.550e-04 | 6.780e-04  |               |               |               | 1.132e+08 | C    |
| $7p^2P_{3/2}$ | $4d^2D_{3/2}$ | 331.91          | 6.352e-03  |                | 6.941e-03 | 6.586e-03  |               |               |               | 9.616e+07 | C+   |
| $7p^2P_{3/2}$ | $5d^2D_{3/2}$ | 749.59          | 2.664e-02  |                | 6.573e-02 | 6.311e-02  |               |               |               | 7.905e+07 | B    |
| $7p^2P_{3/2}$ | $6d^2D_{3/2}$ | 2324.63         | 2.407e-01  |                | 1.842e+00 | 1.790e+00  |               |               |               | 7.427e+07 | C+   |
| $7p^2P_{3/2}$ | $3d^2D_{5/2}$ | 150.06          | 1.031e-02  |                | 5.095e-03 | 6.079e-03  |               |               |               | 7.637e+08 | C    |
| $7p^2P_{3/2}$ | $4d^2D_{5/2}$ | 331.97          | 4.808e-02  |                | 5.255e-02 | 5.923e-02  |               |               |               | 7.276e+08 | C+   |
| $7p^2P_{3/2}$ | $5d^2D_{5/2}$ | 749.75          | 2.175e-01  |                | 5.367e-01 | 5.683e-01  |               |               |               | 6.451e+08 | B+   |
| $7p^2P_{3/2}$ | $6d^2D_{5/2}$ | 2325.45         | 2.083e+00  |                | 1.595e+01 | 1.613e+01  |               |               |               | 6.424e+08 | C+   |
| $7s^2S_{1/2}$ | $3p^2P_{1/2}$ | 117.50          | 6.179e-03  |                | 2.390e-03 | 2.910e-03  |               |               |               | 1.493e+09 | C    |
| $7s^2S_{1/2}$ | $4p^2P_{1/2}$ | 276.15          | 2.002e-02  |                | 1.820e-02 | 2.075e-02  |               |               |               | 8.756e+08 | C+   |
| $7s^2S_{1/2}$ | $5p^2P_{1/2}$ | 633.36          | 7.400e-02  |                | 1.543e-01 | 1.654e-01  |               |               |               | 6.152e+08 | B    |
| $7s^2S_{1/2}$ | $6p^2P_{1/2}$ | 1894.02         | 5.468e-01  |                | 3.410e+00 | 3.522e+00  |               |               |               | 5.084e+08 | B    |
| $7s^2S_{1/2}$ | $3p^2P_{3/2}$ | 117.87          | 1.253e-02  |                | 4.861e-03 | 5.881e-03  |               |               |               | 3.007e+09 | C    |
| $7s^2S_{1/2}$ | $4p^2P_{3/2}$ | 276.93          | 4.051e-02  |                | 3.693e-02 | 4.196e-02  |               |               |               | 1.762e+09 | C+   |
| $7s^2S_{1/2}$ | $5p^2P_{3/2}$ | 635.31          | 1.497e-01  |                | 3.132e-01 | 3.351e-01  |               |               |               | 1.237e+09 | B    |
| $7s^2S_{1/2}$ | $6p^2P_{3/2}$ | 1903.73         | 1.113e+00  |                | 6.975e+00 | 7.199e+00  |               |               |               | 1.024e+09 | B    |
| $8d^2D_{3/2}$ | $3p^2P_{1/2}$ | 110.41          | 2.489e-02  |                | 9.047e-03 | 1.050e-02  |               |               |               | 3.405e+09 | E    |
| $8d^2D_{3/2}$ | $4p^2P_{1/2}$ | 239.97          | 4.055e-02  |                | 3.204e-02 | 2.904e-02  |               |               |               | 1.174e+09 | E    |
| $8d^2D_{3/2}$ | $5p^2P_{1/2}$ | 470.62          | 5.084e-02  |                | 7.876e-02 | 7.635e-02  |               |               |               | 3.827e+08 | D+   |
| $8d^2D_{3/2}$ | $6p^2P_{1/2}$ | 931.12          | 7.574e-02  |                | 2.322e-01 | 2.231e-01  |               |               |               | 1.457e+08 | D+   |
| $8d^2D_{3/2}$ | $7p^2P_{1/2}$ | 2165.36         | 1.134e-01  |                | 8.082e-01 | 8.162e-01  |               |               |               | 4.032e+07 | C    |
| $8d^2D_{3/2}$ | $8p^2P_{1/2}$ | 13515.72        | 3.489e+00  |                | 1.552e+02 | 1.544e+02  |               |               |               | 3.185e+07 | E    |
| $8d^2D_{3/2}$ | $3p^2P_{3/2}$ | 110.74          | 4.873e-03  |                | 1.777e-03 | 2.125e-03  |               |               |               | 6.626e+08 | E    |
| $8d^2D_{3/2}$ | $4p^2P_{3/2}$ | 240.55          | 7.597e-03  |                | 6.016e-03 | 5.918e-03  |               |               |               | 2.189e+08 | E    |
| $8d^2D_{3/2}$ | $5p^2P_{3/2}$ | 471.69          | 1.017e-02  |                | 1.580e-02 | 1.569e-02  |               |               |               | 7.625e+07 | E    |
| $8d^2D_{3/2}$ | $6p^2P_{3/2}$ | 933.46          | 1.425e-02  |                | 4.381e-02 | 4.641e-02  |               |               |               | 2.728e+07 | D    |
| $8d^2D_{3/2}$ | $7p^2P_{3/2}$ | 2173.12         | 2.446e-02  |                | 1.750e-01 | 1.745e-01  |               |               |               | 8.638e+06 | D+   |
| $8d^2D_{3/2}$ | $8p^2P_{3/2}$ | 13716.78        | 6.371e-01  |                | 2.877e+01 | 3.099e+01  |               |               |               | 5.646e+06 | E    |
| $8d^2D_{3/2}$ | $4f^2F_{5/2}$ | 305.10          | 6.175e-03  |                | 6.202e-03 | 6.659e-03  |               |               |               | 1.106e+08 | E    |

Table S1 – continued from previous page

| Upper level   | Lower level   | $\lambda$ [RCI] | $gf$ [RCI] | $gf$ Ref. [17] | $S$ [RCI] | $S$ [MBPT] | $S$ Ref. [48] | $S$ Ref. [20] | $S$ Ref. [22] | $A$ [RCI] | Unc. |
|---------------|---------------|-----------------|------------|----------------|-----------|------------|---------------|---------------|---------------|-----------|------|
| $8d^2D_{3/2}$ | $5f^2F_{5/2}$ | 590.66          | 2.816e-02  |                | 5.475e-02 | 5.080e-02  |               |               | 1.346e+08     | D         |      |
| $8d^2D_{3/2}$ | $6f^2F_{5/2}$ | 1202.40         | 1.087e-01  |                | 4.303e-01 | 4.249e-01  |               |               | 1.254e+08     | C         |      |
| $8d^2D_{3/2}$ | $7f^2F_{5/2}$ | 3202.32         | 7.361e-01  |                | 7.761e+00 | 8.403e+00  |               |               | 1.197e+08     | C+        |      |
| $8d^2D_{5/2}$ | $3p^2P_{3/2}$ | 110.74          | 3.687e-02  |                | 1.344e-02 | 1.908e-02  |               |               | 3.342e+09     | E         |      |
| $8d^2D_{5/2}$ | $4p^2P_{3/2}$ | 240.55          | 4.949e-02  |                | 3.919e-02 | 5.311e-02  |               |               | 9.508e+08     | D         |      |
| $8d^2D_{5/2}$ | $5p^2P_{3/2}$ | 471.67          | 7.076e-02  |                | 1.099e-01 | 1.408e-01  |               |               | 3.536e+08     | D+        |      |
| $8d^2D_{5/2}$ | $6p^2P_{3/2}$ | 933.36          | 1.119e-01  |                | 3.439e-01 | 4.160e-01  |               |               | 1.428e+08     | C         |      |
| $8d^2D_{5/2}$ | $7p^2P_{3/2}$ | 2172.61         | 1.887e-01  |                | 1.350e+00 | 1.560e+00  |               |               | 4.444e+07     | C         |      |
| $8d^2D_{5/2}$ | $8p^2P_{3/2}$ | 13696.40        | 6.226e+00  |                | 2.807e+02 | 2.789e+02  |               |               | 3.690e+07     | E         |      |
| $8d^2D_{5/2}$ | $4f^2F_{5/2}$ | 305.09          | 2.397e-04  |                | 2.408e-04 | 4.746e-04  |               |               | 2.863e+06     | E         |      |
| $8d^2D_{5/2}$ | $5f^2F_{5/2}$ | 590.62          | 1.361e-03  |                | 2.646e-03 | 3.620e-03  |               |               | 4.336e+06     | E         |      |
| $8d^2D_{5/2}$ | $6f^2F_{5/2}$ | 1202.25         | 6.718e-03  |                | 2.659e-02 | 3.028e-02  |               |               | 5.167e+06     | E         |      |
| $8d^2D_{5/2}$ | $7f^2F_{5/2}$ | 3201.21         | 5.534e-02  |                | 5.833e-01 | 5.985e-01  |               |               | 6.004e+06     | D+        |      |
| $8d^2D_{5/2}$ | $4f^2F_{7/2}$ | 305.12          | 4.802e-03  |                | 4.823e-03 | 9.487e-03  |               |               | 5.734e+07     | E         |      |
| $8d^2D_{5/2}$ | $5f^2F_{7/2}$ | 590.67          | 2.725e-02  |                | 5.299e-02 | 7.241e-02  |               |               | 8.682e+07     | D         |      |
| $8d^2D_{5/2}$ | $6f^2F_{7/2}$ | 1202.37         | 1.345e-01  |                | 5.323e-01 | 6.059e-01  |               |               | 1.034e+08     | C         |      |
| $8d^2D_{5/2}$ | $7f^2F_{7/2}$ | 3201.76         | 1.108e+00  |                | 1.168e+01 | 1.198e+01  |               |               | 1.202e+08     | C+        |      |
| $8f^2F_{5/2}$ | $3d^2D_{3/2}$ | 139.86          | 7.443e-02  |                | 3.427e-02 | 3.938e-02  |               |               | 4.230e+09     | E         |      |
| $8f^2F_{5/2}$ | $4d^2D_{3/2}$ | 285.89          | 1.639e-01  |                | 1.543e-01 | 1.649e-01  |               |               | 2.229e+09     | D+        |      |
| $8f^2F_{5/2}$ | $5d^2D_{3/2}$ | 549.75          | 3.120e-01  |                | 5.647e-01 | 5.880e-01  |               |               | 1.148e+09     | C         |      |
| $8f^2F_{5/2}$ | $6d^2D_{3/2}$ | 1092.75         | 6.632e-01  |                | 2.386e+00 | 2.461e+00  |               |               | 6.174e+08     | C+        |      |
| $8f^2F_{5/2}$ | $3d^2D_{5/2}$ | 139.88          | 4.840e-03  |                | 2.229e-03 | 2.808e-03  |               |               | 2.750e+08     | E         |      |
| $8f^2F_{5/2}$ | $4d^2D_{5/2}$ | 285.94          | 1.084e-02  |                | 1.021e-02 | 1.177e-02  |               |               | 1.474e+08     | E         |      |
| $8f^2F_{5/2}$ | $5d^2D_{5/2}$ | 549.84          | 2.101e-02  |                | 3.803e-02 | 4.200e-02  |               |               | 7.726e+07     | D         |      |
| $8f^2F_{5/2}$ | $6d^2D_{5/2}$ | 1092.93         | 4.566e-02  |                | 1.643e-01 | 1.760e-01  |               |               | 4.249e+07     | D+        |      |
| $8f^2F_{5/2}$ | $7d^2D_{5/2}$ | 2674.52         | 1.451e-01  |                | 1.278e+00 | 1.338e+00  |               |               | 2.255e+07     | C         |      |
| $8f^2F_{5/2}$ | $5g^2G_{7/2}$ | 584.64          | 3.221e-03  |                | 6.199e-03 | 7.520e-03  |               |               | 1.048e+07     | E         |      |
| $8f^2F_{5/2}$ | $6g^2G_{7/2}$ | 1174.10         | 2.877e-02  |                | 1.112e-01 | 1.180e-01  |               |               | 2.320e+07     | D+        |      |
| $8f^2F_{5/2}$ | $7g^2G_{7/2}$ | 2994.88         | 3.037e-01  |                | 2.994e+00 | 2.978e+00  |               |               | 3.764e+07     | C+        |      |
| $8f^2F_{7/2}$ | $3d^2D_{5/2}$ | 139.88          | 9.683e-02  |                | 4.459e-02 | 5.617e-02  |               |               | 4.126e+09     | D         |      |
| $8f^2F_{7/2}$ | $4d^2D_{5/2}$ | 285.93          | 2.169e-01  |                | 2.042e-01 | 2.354e-01  |               |               | 2.212e+09     | D+        |      |
| $8f^2F_{7/2}$ | $5d^2D_{5/2}$ | 549.83          | 4.202e-01  |                | 7.605e-01 | 8.398e-01  |               |               | 1.159e+09     | C         |      |
| $8f^2F_{7/2}$ | $6d^2D_{5/2}$ | 1092.89         | 9.128e-01  |                | 3.284e+00 | 3.518e+00  |               |               | 6.372e+08     | C+        |      |
| $8f^2F_{7/2}$ | $7d^2D_{5/2}$ | 2674.26         | 2.900e+00  |                | 2.553e+01 | 2.674e+01  |               |               | 3.381e+08     | C+        |      |
| $8f^2F_{7/2}$ | $8d^2D_{5/2}$ | 40478.34        | 3.227e+00  |                | 4.301e+02 | 4.265e+02  |               |               | 1.642e+06     | E         |      |
| $8f^2F_{7/2}$ | $7g^2G_{7/2}$ | 2994.55         | 1.123e-02  |                | 1.107e-01 | 1.101e-01  |               |               | 1.044e+06     | D+        |      |
| $8f^2F_{7/2}$ | $5g^2G_{9/2}$ | 584.66          | 4.172e-03  |                | 8.030e-03 | 9.741e-03  |               |               | 1.018e+07     | E         |      |
| $8f^2F_{7/2}$ | $6g^2G_{9/2}$ | 1174.12         | 3.728e-02  |                | 1.441e-01 | 1.529e-01  |               |               | 2.255e+07     | D+        |      |
| $8f^2F_{7/2}$ | $7g^2G_{9/2}$ | 2994.86         | 3.934e-01  |                | 3.879e+00 | 3.858e+00  |               |               | 3.657e+07     | C+        |      |

Table S1 – continued from previous page

| Upper level    | Lower level    | $\lambda$ [RCI] | $gf$ [RCI] | $gf$ Ref. [17] | $S$ [RCI] | $S$ [MBPT] | $S$ Ref. [48] | $S$ Ref. [20] | $S$ Ref. [22] | $A$ [RCI] | Unc. |
|----------------|----------------|-----------------|------------|----------------|-----------|------------|---------------|---------------|---------------|-----------|------|
| $8g^2G_{7/2}$  | $4f^2F_{5/2}$  | 302.61          | 1.588e-01  |                | 1.582e-01 | 1.679e-01  |               |               |               | 1.446e+09 | D+   |
| $8g^2G_{7/2}$  | $5f^2F_{5/2}$  | 581.40          | 5.080e-01  |                | 9.724e-01 | 1.003e+00  |               |               |               | 1.253e+09 | C+   |
| $8g^2G_{7/2}$  | $6f^2F_{5/2}$  | 1164.65         | 1.460e+00  |                | 5.599e+00 | 5.717e+00  |               |               |               | 8.976e+08 | B    |
| $8g^2G_{7/2}$  | $7f^2F_{5/2}$  | 2947.85         | 6.249e+00  |                | 6.064e+01 | 6.189e+01  |               |               |               | 5.996e+08 | C+   |
| $8g^2G_{7/2}$  | $4f^2F_{7/2}$  | 302.64          | 5.880e-03  |                | 5.858e-03 | 6.215e-03  |               |               |               | 5.353e+07 | E    |
| $8g^2G_{7/2}$  | $5f^2F_{7/2}$  | 581.45          | 1.881e-02  |                | 3.601e-02 | 3.715e-02  |               |               |               | 4.639e+07 | D    |
| $8g^2G_{7/2}$  | $6f^2F_{7/2}$  | 1164.77         | 5.408e-02  |                | 2.074e-01 | 2.118e-01  |               |               |               | 3.324e+07 | D+   |
| $8g^2G_{7/2}$  | $7f^2F_{7/2}$  | 2948.31         | 2.316e-01  |                | 2.247e+00 | 2.293e+00  |               |               |               | 2.221e+07 | C    |
| $8g^2G_{7/2}$  | $6h^2H_{9/2}$  | 1171.84         | 8.857e-03  |                | 3.417e-02 | 3.456e-02  |               |               |               | 5.378e+06 | E    |
| $8g^2G_{7/2}$  | $7h^2H_{9/2}$  | 2978.77         | 1.697e-01  |                | 1.664e+00 | 1.658e+00  |               |               |               | 1.595e+07 | C    |
| $8g^2G_{9/2}$  | $4f^2F_{7/2}$  | 302.64          | 2.059e-01  |                | 2.051e-01 | 2.176e-01  |               |               |               | 1.499e+09 | D+   |
| $8g^2G_{9/2}$  | $5f^2F_{7/2}$  | 581.44          | 6.585e-01  |                | 1.261e+00 | 1.301e+00  |               |               |               | 1.299e+09 | C+   |
| $8g^2G_{9/2}$  | $6f^2F_{7/2}$  | 1164.74         | 1.893e+00  |                | 7.258e+00 | 7.412e+00  |               |               |               | 9.307e+08 | B    |
| $8g^2G_{9/2}$  | $7f^2F_{7/2}$  | 2948.12         | 8.102e+00  |                | 7.863e+01 | 8.024e+01  |               |               |               | 6.218e+08 | C+   |
| $8g^2G_{9/2}$  | $6h^2H_{11/2}$ | 1171.86         | 1.086e-02  |                | 4.192e-02 | 4.241e-02  |               |               |               | 5.277e+06 | D    |
| $8g^2G_{9/2}$  | $7h^2H_{11/2}$ | 2978.78         | 2.082e-01  |                | 2.042e+00 | 2.034e+00  |               |               |               | 1.565e+07 | C    |
| $8h^2H_{11/2}$ | $5g^2G_{9/2}$  | 583.83          | 5.858e-01  |                | 1.126e+00 | 1.135e+00  |               |               |               | 9.553e+08 | C+   |
| $8h^2H_{11/2}$ | $6g^2G_{9/2}$  | 1170.78         | 2.606e+00  |                | 1.004e+01 | 1.008e+01  |               |               |               | 1.057e+09 | B    |
| $8h^2H_{11/2}$ | $7g^2G_{9/2}$  | 2973.25         | 1.363e+01  |                | 1.334e+02 | 1.339e+02  |               |               |               | 8.570e+08 | C+   |
| $8h^2H_{11/2}$ | $7i^2I_{13/2}$ | 2977.32         | 7.708e-02  |                | 7.555e-01 | 7.530e-01  |               |               |               | 4.833e+06 | C    |
| $8h^2H_{9/2}$  | $5g^2G_{7/2}$  | 583.80          | 4.774e-01  |                | 9.175e-01 | 9.245e-01  |               |               |               | 9.342e+08 | C+   |
| $8h^2H_{9/2}$  | $6g^2G_{7/2}$  | 1170.73         | 2.123e+00  |                | 8.184e+00 | 8.212e+00  |               |               |               | 1.033e+09 | B    |
| $8h^2H_{9/2}$  | $7g^2G_{7/2}$  | 2973.09         | 1.110e+01  |                | 1.087e+02 | 1.091e+02  |               |               |               | 8.379e+08 | C+   |
| $8h^2H_{9/2}$  | $5g^2G_{9/2}$  | 583.83          | 1.084e-02  |                | 2.084e-02 | 2.100e-02  |               |               |               | 2.122e+07 | E    |
| $8h^2H_{9/2}$  | $6g^2G_{9/2}$  | 1170.81         | 4.825e-02  |                | 1.860e-01 | 1.866e-01  |               |               |               | 2.348e+07 | D+   |
| $8h^2H_{9/2}$  | $7g^2G_{9/2}$  | 2973.39         | 2.524e-01  |                | 2.471e+00 | 2.481e+00  |               |               |               | 1.904e+07 | C+   |
| $8h^2H_{9/2}$  | $7i^2I_{11/2}$ | 2977.32         | 6.508e-02  |                | 6.379e-01 | 6.357e-01  |               |               |               | 4.897e+06 | C    |
| $8i^2I_{11/2}$ | $6h^2H_{9/2}$  | 1171.38         | 2.167e+00  |                | 8.356e+00 | 8.365e+00  |               |               |               | 8.778e+08 | B    |
| $8i^2I_{11/2}$ | $7h^2H_{9/2}$  | 2975.81         | 1.804e+01  |                | 1.767e+02 | 1.769e+02  |               |               |               | 1.132e+09 | C+   |
| $8i^2I_{11/2}$ | $6h^2H_{11/2}$ | 1171.43         | 3.333e-02  |                | 1.285e-01 | 1.287e-01  |               |               |               | 1.350e+07 | D+   |
| $8i^2I_{11/2}$ | $7h^2H_{11/2}$ | 2976.01         | 2.776e-01  |                | 2.719e+00 | 2.722e+00  |               |               |               | 1.742e+07 | C+   |
| $8i^2I_{13/2}$ | $6h^2H_{11/2}$ | 1171.42         | 2.567e+00  |                | 9.899e+00 | 9.909e+00  |               |               |               | 8.912e+08 | B    |
| $8i^2I_{13/2}$ | $7h^2H_{11/2}$ | 2975.91         | 2.137e+01  |                | 2.094e+02 | 2.096e+02  |               |               |               | 1.150e+09 | C+   |
| $8p^2P_{1/2}$  | $3s^2S_{1/2}$  | 96.32           | 4.604e-03  |                | 1.460e-03 | 2.092e-03  |               |               |               | 1.655e+09 | E    |
| $8p^2P_{1/2}$  | $4s^2S_{1/2}$  | 216.70          | 7.703e-03  |                | 5.495e-03 | 7.706e-03  |               |               |               | 5.471e+08 | E    |
| $8p^2P_{1/2}$  | $5s^2S_{1/2}$  | 434.75          | 1.411e-02  |                | 2.019e-02 | 2.594e-02  |               |               |               | 2.490e+08 | E    |
| $8p^2P_{1/2}$  | $6s^2S_{1/2}$  | 878.83          | 2.989e-02  |                | 8.647e-02 | 1.012e-01  |               |               |               | 1.290e+08 | D+   |
| $8p^2P_{1/2}$  | $7s^2S_{1/2}$  | 2118.59         | 8.283e-02  |                | 5.777e-01 | 6.180e-01  |               |               |               | 6.155e+07 | C    |
| $8p^2P_{1/2}$  | $8s^2S_{1/2}$  | 18156.98        | 1.236e+00  |                | 7.389e+01 | 7.303e+01  |               |               |               | 1.250e+07 | E    |

Table S1 – continued from previous page

| Upper level   | Lower level   | $\lambda$ [RCI] | $gf$ [RCI] | $gf$ Ref. [17] | $S$ [RCI] | $S$ [MBPT] | $S$ Ref. [48] | $S$ Ref. [20] | $S$ Ref. [22] | $A$ [RCI] | Unc. |
|---------------|---------------|-----------------|------------|----------------|-----------|------------|---------------|---------------|---------------|-----------|------|
| $8p^2P_{1/2}$ | $3d^2D_{3/2}$ | 141.82          | 4.013e-03  |                | 1.874e-03 | 2.085e-03  |               |               |               | 6.654e+08 | E    |
| $8p^2P_{1/2}$ | $4d^2D_{3/2}$ | 294.20          | 1.476e-02  |                | 1.429e-02 | 1.570e-02  |               |               |               | 5.686e+08 | E    |
| $8p^2P_{1/2}$ | $5d^2D_{3/2}$ | 581.31          | 4.613e-02  |                | 8.828e-02 | 9.369e-02  |               |               |               | 4.552e+08 | D+   |
| $8p^2P_{1/2}$ | $6d^2D_{3/2}$ | 1224.96         | 1.721e-01  |                | 6.942e-01 | 7.224e-01  |               |               |               | 3.826e+08 | C    |
| $8p^2P_{3/2}$ | $3s^2S_{1/2}$ | 96.31           | 8.995e-03  |                | 2.852e-03 | 4.093e-03  |               |               |               | 1.617e+09 | E    |
| $8p^2P_{3/2}$ | $4s^2S_{1/2}$ | 216.65          | 1.496e-02  |                | 1.067e-02 | 1.501e-02  |               |               |               | 5.315e+08 | E    |
| $8p^2P_{3/2}$ | $5s^2S_{1/2}$ | 434.55          | 2.727e-02  |                | 3.902e-02 | 5.028e-02  |               |               |               | 2.408e+08 | D    |
| $8p^2P_{3/2}$ | $6s^2S_{1/2}$ | 878.00          | 5.741e-02  |                | 1.659e-01 | 1.947e-01  |               |               |               | 1.242e+08 | D+   |
| $8p^2P_{3/2}$ | $7s^2S_{1/2}$ | 2113.73         | 1.568e-01  |                | 1.091e+00 | 1.170e+00  |               |               |               | 5.854e+07 | C    |
| $8p^2P_{3/2}$ | $8s^2S_{1/2}$ | 17806.34        | 2.518e+00  |                | 1.476e+02 | 1.459e+02  |               |               |               | 1.324e+07 | E    |
| $8p^2P_{3/2}$ | $3d^2D_{3/2}$ | 141.80          | 7.995e-04  |                | 3.732e-04 | 4.158e-04  |               |               |               | 6.631e+07 | E    |
| $8p^2P_{3/2}$ | $4d^2D_{3/2}$ | 294.10          | 2.938e-03  |                | 2.845e-03 | 3.126e-03  |               |               |               | 5.664e+07 | E    |
| $8p^2P_{3/2}$ | $5d^2D_{3/2}$ | 580.95          | 9.182e-03  |                | 1.756e-02 | 1.863e-02  |               |               |               | 4.537e+07 | E    |
| $8p^2P_{3/2}$ | $6d^2D_{3/2}$ | 1223.33         | 3.422e-02  |                | 1.378e-01 | 1.433e-01  |               |               |               | 3.813e+07 | D+   |
| $8p^2P_{3/2}$ | $3d^2D_{5/2}$ | 141.82          | 5.720e-03  |                | 2.671e-03 | 3.720e-03  |               |               |               | 4.742e+08 | E    |
| $8p^2P_{3/2}$ | $4d^2D_{5/2}$ | 294.15          | 2.297e-02  |                | 2.224e-02 | 2.807e-02  |               |               |               | 4.427e+08 | E    |
| $8p^2P_{3/2}$ | $5d^2D_{5/2}$ | 581.04          | 7.628e-02  |                | 1.459e-01 | 1.675e-01  |               |               |               | 3.768e+08 | D+   |
| $8p^2P_{3/2}$ | $6d^2D_{5/2}$ | 1223.56         | 2.990e-01  |                | 1.204e+00 | 1.290e+00  |               |               |               | 3.330e+08 | C+   |
| $8p^2P_{3/2}$ | $7d^2D_{5/2}$ | 3620.32         | 2.648e+00  |                | 3.156e+01 | 3.206e+01  |               |               |               | 3.369e+08 | C+   |
| $8s^2S_{1/2}$ | $3p^2P_{1/2}$ | 112.01          | 3.543e-03  |                | 1.306e-03 | 1.875e-03  |               |               |               | 9.417e+08 | E    |
| $8s^2S_{1/2}$ | $4p^2P_{1/2}$ | 247.64          | 9.963e-03  |                | 8.122e-03 | 1.049e-02  |               |               |               | 5.418e+08 | E    |
| $8s^2S_{1/2}$ | $5p^2P_{1/2}$ | 501.05          | 2.781e-02  |                | 4.588e-02 | 5.366e-02  |               |               |               | 3.695e+08 | D    |
| $8s^2S_{1/2}$ | $6p^2P_{1/2}$ | 1058.30         | 9.481e-02  |                | 3.303e-01 | 3.605e-01  |               |               |               | 2.823e+08 | D+   |
| $8s^2S_{1/2}$ | $7p^2P_{1/2}$ | 3005.22         | 6.707e-01  |                | 6.636e+00 | 6.912e+00  |               |               |               | 2.477e+08 | C+   |
| $8s^2S_{1/2}$ | $3p^2P_{3/2}$ | 112.35          | 7.185e-03  |                | 2.658e-03 | 3.769e-03  |               |               |               | 1.898e+09 | E    |
| $8s^2S_{1/2}$ | $4p^2P_{3/2}$ | 248.26          | 2.016e-02  |                | 1.648e-02 | 2.111e-02  |               |               |               | 1.091e+09 | E    |
| $8s^2S_{1/2}$ | $5p^2P_{3/2}$ | 502.27          | 5.619e-02  |                | 9.292e-02 | 1.083e-01  |               |               |               | 7.429e+08 | D+   |
| $8s^2S_{1/2}$ | $6p^2P_{3/2}$ | 1061.32         | 1.917e-01  |                | 6.699e-01 | 7.295e-01  |               |               |               | 5.676e+08 | C    |
| $8s^2S_{1/2}$ | $7p^2P_{3/2}$ | 3020.20         | 1.365e+00  |                | 1.357e+01 | 1.412e+01  |               |               |               | 4.990e+08 | C+   |
| $9d^2D_{3/2}$ | $3p^2P_{1/2}$ | 107.58          | 1.321e-02  |                | 4.680e-03 | 1.108e-02  |               |               |               | 1.904e+09 | E    |
| $9d^2D_{3/2}$ | $4p^2P_{1/2}$ | 226.99          | 1.663e-02  |                | 1.242e-02 | 2.847e-02  |               |               |               | 5.381e+08 | E    |
| $9d^2D_{3/2}$ | $5p^2P_{1/2}$ | 423.15          | 2.245e-02  |                | 3.128e-02 | 6.413e-02  |               |               |               | 2.091e+08 | E    |
| $9d^2D_{3/2}$ | $6p^2P_{1/2}$ | 761.98          | 3.255e-02  |                | 8.165e-02 | 1.495e-01  |               |               |               | 9.348e+07 | E    |
| $9d^2D_{3/2}$ | $7p^2P_{1/2}$ | 1428.16         | 5.202e-02  |                | 2.446e-01 | 4.002e-01  |               |               |               | 4.253e+07 | E    |
| $9d^2D_{3/2}$ | $8p^2P_{1/2}$ | 3201.29         | 8.627e-02  |                | 9.092e-01 | 1.358e+00  |               |               |               | 1.404e+07 | D    |
| $9d^2D_{3/2}$ | $9p^2P_{1/2}$ | 19525.34        | 3.953e+00  |                | 2.541e+02 | 2.440e+02  |               |               |               | 1.729e+07 | E    |
| $9d^2D_{3/2}$ | $3p^2P_{3/2}$ | 107.90          | 2.703e-03  |                | 9.601e-04 | 2.215e-03  |               |               |               | 3.872e+08 | E    |
| $9d^2D_{3/2}$ | $4p^2P_{3/2}$ | 227.51          | 3.462e-03  |                | 2.593e-03 | 5.727e-03  |               |               |               | 1.115e+08 | E    |
| $9d^2D_{3/2}$ | $5p^2P_{3/2}$ | 424.01          | 4.625e-03  |                | 6.456e-03 | 1.299e-02  |               |               |               | 4.289e+07 | E    |

Table S1 – continued from previous page

| Upper level   | Lower level   | $\lambda$ [RCI] | $gf$ [RCI] | $gf$ Ref. [17] | $S$ [RCI] | $S$ [MBPT] | $S$ Ref. [48] | $S$ Ref. [20] | $S$ Ref. [22] | $A$ [RCI] | Unc. |
|---------------|---------------|-----------------|------------|----------------|-----------|------------|---------------|---------------|---------------|-----------|------|
| $9d^2D_{3/2}$ | $6p^2P_{3/2}$ | 763.55          | 6.778e-03  |                | 1.704e-02 | 3.054e-02  |               |               |               | 1.939e+07 | E    |
| $9d^2D_{3/2}$ | $7p^2P_{3/2}$ | 1431.53         | 1.102e-02  |                | 5.195e-02 | 8.280e-02  |               |               |               | 8.971e+06 | E    |
| $9d^2D_{3/2}$ | $8p^2P_{3/2}$ | 3212.44         | 1.885e-02  |                | 1.993e-01 | 2.889e-01  |               |               |               | 3.045e+06 | D    |
| $9d^2D_{3/2}$ | $9p^2P_{3/2}$ | 19814.68        | 7.812e-01  |                | 5.096e+01 | 4.900e+01  |               |               |               | 3.318e+06 | E    |
| $9d^2D_{3/2}$ | $4f^2F_{5/2}$ | 284.42          | 1.757e-03  |                | 1.645e-03 | 6.405e-03  |               |               |               | 3.622e+07 | E    |
| $9d^2D_{3/2}$ | $5f^2F_{5/2}$ | 517.76          | 8.906e-03  |                | 1.518e-02 | 3.215e-02  |               |               |               | 5.540e+07 | E    |
| $9d^2D_{3/2}$ | $6f^2F_{5/2}$ | 934.53          | 3.364e-02  |                | 1.035e-01 | 1.568e-01  |               |               |               | 6.422e+07 | D    |
| $9d^2D_{3/2}$ | $7f^2F_{5/2}$ | 1816.00         | 1.393e-01  |                | 8.327e-01 | 1.020e+00  |               |               |               | 7.043e+07 | C    |
| $9d^2D_{3/2}$ | $8f^2F_{5/2}$ | 4681.44         | 1.031e+00  |                | 1.590e+01 | 1.689e+01  |               |               |               | 7.848e+07 | C    |
| $9d^2D_{5/2}$ | $3p^2P_{3/2}$ | 107.89          | 2.328e-02  |                | 8.268e-03 | 1.990e-02  |               |               |               | 2.223e+09 | E    |
| $9d^2D_{5/2}$ | $4p^2P_{3/2}$ | 227.50          | 2.987e-02  |                | 2.237e-02 | 5.142e-02  |               |               |               | 6.416e+08 | E    |
| $9d^2D_{5/2}$ | $5p^2P_{3/2}$ | 424.00          | 4.000e-02  |                | 5.584e-02 | 1.166e-01  |               |               |               | 2.474e+08 | E    |
| $9d^2D_{5/2}$ | $6p^2P_{3/2}$ | 763.50          | 5.889e-02  |                | 1.480e-01 | 2.739e-01  |               |               |               | 1.123e+08 | E    |
| $9d^2D_{5/2}$ | $7p^2P_{3/2}$ | 1431.35         | 9.586e-02  |                | 4.517e-01 | 7.420e-01  |               |               |               | 5.202e+07 | E    |
| $9d^2D_{5/2}$ | $8p^2P_{3/2}$ | 3211.55         | 1.643e-01  |                | 1.737e+00 | 2.583e+00  |               |               |               | 1.771e+07 | D    |
| $9d^2D_{5/2}$ | $9p^2P_{3/2}$ | 19781.01        | 7.055e+00  |                | 4.594e+02 | 4.410e+02  |               |               |               | 2.004e+07 | E    |
| $9d^2D_{5/2}$ | $4f^2F_{5/2}$ | 284.41          | 1.206e-04  |                | 1.129e-04 | 4.569e-04  |               |               |               | 1.658e+06 | E    |
| $9d^2D_{5/2}$ | $5f^2F_{5/2}$ | 517.73          | 6.166e-04  |                | 1.051e-03 | 2.292e-03  |               |               |               | 2.557e+06 | E    |
| $9d^2D_{5/2}$ | $6f^2F_{5/2}$ | 934.46          | 2.346e-03  |                | 7.216e-03 | 1.117e-02  |               |               |               | 2.986e+06 | E    |
| $9d^2D_{5/2}$ | $7f^2F_{5/2}$ | 1815.72         | 9.750e-03  |                | 5.828e-02 | 7.267e-02  |               |               |               | 3.288e+06 | D    |
| $9d^2D_{5/2}$ | $8f^2F_{5/2}$ | 4679.56         | 7.278e-02  |                | 1.121e+00 | 1.203e+00  |               |               |               | 3.695e+06 | D+   |
| $9d^2D_{5/2}$ | $4f^2F_{7/2}$ | 284.43          | 2.419e-03  |                | 2.266e-03 | 9.120e-03  |               |               |               | 3.325e+07 | E    |
| $9d^2D_{5/2}$ | $5f^2F_{7/2}$ | 517.77          | 1.236e-02  |                | 2.107e-02 | 4.580e-02  |               |               |               | 5.126e+07 | E    |
| $9d^2D_{5/2}$ | $6f^2F_{7/2}$ | 934.53          | 4.695e-02  |                | 1.444e-01 | 2.234e-01  |               |               |               | 5.976e+07 | E    |
| $9d^2D_{5/2}$ | $7f^2F_{7/2}$ | 1815.90         | 1.951e-01  |                | 1.167e+00 | 1.454e+00  |               |               |               | 6.579e+07 | D+   |
| $9d^2D_{5/2}$ | $8f^2F_{7/2}$ | 4680.35         | 1.457e+00  |                | 2.245e+01 | 2.408e+01  |               |               |               | 7.395e+07 | C    |
| $9f^2F_{5/2}$ | $3d^2D_{3/2}$ | 135.48          | 3.928e-02  |                | 1.752e-02 | 2.889e-02  |               |               |               | 2.379e+09 | E    |
| $9f^2F_{5/2}$ | $4d^2D_{3/2}$ | 268.18          | 8.477e-02  |                | 7.485e-02 | 1.084e-01  |               |               |               | 1.310e+09 | D    |
| $9f^2F_{5/2}$ | $5d^2D_{3/2}$ | 487.80          | 1.508e-01  |                | 2.422e-01 | 3.241e-01  |               |               |               | 7.047e+08 | D+   |
| $9f^2F_{5/2}$ | $6d^2D_{3/2}$ | 872.50          | 2.749e-01  |                | 7.896e-01 | 1.001e+00  |               |               |               | 4.014e+08 | D+   |
| $9f^2F_{5/2}$ | $9d^2D_{3/2}$ | 57463.43        | 2.627e+00  |                | 4.970e+02 | 4.833e+02  |               |               |               | 8.846e+05 | E    |
| $9f^2F_{5/2}$ | $3d^2D_{5/2}$ | 135.50          | 2.964e-03  |                | 1.322e-03 | 2.054e-03  |               |               |               | 1.794e+08 | E    |
| $9f^2F_{5/2}$ | $4d^2D_{5/2}$ | 268.22          | 6.319e-03  |                | 5.580e-03 | 7.721e-03  |               |               |               | 9.765e+07 | E    |
| $9f^2F_{5/2}$ | $5d^2D_{5/2}$ | 487.87          | 1.120e-02  |                | 1.799e-02 | 2.311e-02  |               |               |               | 5.230e+07 | E    |
| $9f^2F_{5/2}$ | $6d^2D_{5/2}$ | 872.62          | 2.051e-02  |                | 5.892e-02 | 7.143e-02  |               |               |               | 2.995e+07 | D    |
| $9f^2F_{5/2}$ | $7d^2D_{5/2}$ | 1653.14         | 4.406e-02  |                | 2.398e-01 | 2.760e-01  |               |               |               | 1.792e+07 | D+   |
| $9f^2F_{5/2}$ | $8d^2D_{5/2}$ | 3911.13         | 1.410e-01  |                | 1.816e+00 | 1.990e+00  |               |               |               | 1.025e+07 | C    |
| $9f^2F_{5/2}$ | $5g^2G_{7/2}$ | 515.07          | 1.372e-03  |                | 2.326e-03 | 4.196e-03  |               |               |               | 5.748e+06 | E    |
| $9f^2F_{5/2}$ | $6g^2G_{7/2}$ | 923.59          | 9.581e-03  |                | 2.913e-02 | 3.872e-02  |               |               |               | 1.249e+07 | E    |

Table S1 – continued from previous page

| Upper level     | Lower level     | $\lambda$ [RCI] | $gf$ [RCI] | $gf$ Ref. [17] | $S$ [RCI] | $S$ [MBPT] | $S$ Ref. [48] | $S$ Ref. [20] | $S$ Ref. [22] | $A$ [RCI] | Unc. |
|-----------------|-----------------|-----------------|------------|----------------|-----------|------------|---------------|---------------|---------------|-----------|------|
| $9f^2 F_{5/2}$  | $7g^2 G_{7/2}$  | 1770.18         | 5.417e-02  |                | 3.157e-01 | 3.583e-01  |               |               |               | 1.922e+07 | D+   |
| $9f^2 F_{5/2}$  | $8g^2 G_{7/2}$  | 4370.02         | 4.589e-01  |                | 6.602e+00 | 6.791e+00  |               |               |               | 2.671e+07 | C    |
| $9f^2 F_{7/2}$  | $3d^2 D_{5/2}$  | 135.50          | 5.931e-02  |                | 2.646e-02 | 4.109e-02  |               |               |               | 2.693e+09 | E    |
| $9f^2 F_{7/2}$  | $4d^2 D_{5/2}$  | 268.22          | 1.264e-01  |                | 1.116e-01 | 1.544e-01  |               |               |               | 1.465e+09 | D+   |
| $9f^2 F_{7/2}$  | $5d^2 D_{5/2}$  | 487.86          | 2.240e-01  |                | 3.597e-01 | 4.621e-01  |               |               |               | 7.846e+08 | D+   |
| $9f^2 F_{7/2}$  | $6d^2 D_{5/2}$  | 872.60          | 4.102e-01  |                | 1.178e+00 | 1.428e+00  |               |               |               | 4.491e+08 | C    |
| $9f^2 F_{7/2}$  | $7d^2 D_{5/2}$  | 1653.07         | 8.808e-01  |                | 4.794e+00 | 5.517e+00  |               |               |               | 2.688e+08 | C+   |
| $9f^2 F_{7/2}$  | $8d^2 D_{5/2}$  | 3910.75         | 2.818e+00  |                | 3.628e+01 | 3.976e+01  |               |               |               | 1.536e+08 | C    |
| $9f^2 F_{7/2}$  | $9d^2 D_{5/2}$  | 57664.36        | 3.758e+00  |                | 7.133e+02 | 6.907e+02  |               |               |               | 9.422e+05 | E    |
| $9f^2 F_{7/2}$  | $5g^2 G_{9/2}$  | 515.09          | 1.776e-03  |                | 3.012e-03 | 5.434e-03  |               |               |               | 5.582e+06 | E    |
| $9f^2 F_{7/2}$  | $6g^2 G_{9/2}$  | 923.61          | 1.241e-02  |                | 3.774e-02 | 5.016e-02  |               |               |               | 1.213e+07 | D    |
| $9f^2 F_{7/2}$  | $7g^2 G_{9/2}$  | 1770.20         | 7.020e-02  |                | 4.091e-01 | 4.643e-01  |               |               |               | 1.868e+07 | C    |
| $9f^2 F_{7/2}$  | $8g^2 G_{9/2}$  | 4369.96         | 5.945e-01  |                | 8.553e+00 | 8.798e+00  |               |               |               | 2.596e+07 | C    |
| $9g^2 G_{7/2}$  | $4f^2 F_{5/2}$  | 282.89          | 8.621e-02  |                | 8.029e-02 | 9.362e-02  |               |               |               | 8.982e+08 | D+   |
| $9g^2 G_{7/2}$  | $5f^2 F_{5/2}$  | 512.72          | 2.481e-01  |                | 4.188e-01 | 4.612e-01  |               |               |               | 7.870e+08 | C    |
| $9g^2 G_{7/2}$  | $6f^2 F_{5/2}$  | 918.25          | 5.800e-01  |                | 1.753e+00 | 1.873e+00  |               |               |               | 5.735e+08 | C+   |
| $9g^2 G_{7/2}$  | $7f^2 F_{5/2}$  | 1755.51         | 1.498e+00  |                | 8.656e+00 | 9.069e+00  |               |               |               | 4.052e+08 | C+   |
| $9g^2 G_{7/2}$  | $8f^2 F_{5/2}$  | 4299.53         | 6.138e+00  |                | 8.688e+01 | 8.997e+01  |               |               |               | 2.768e+08 | C    |
| $9g^2 G_{7/2}$  | $4f^2 F_{7/2}$  | 282.91          | 3.192e-03  |                | 2.973e-03 | 3.464e-03  |               |               |               | 3.325e+07 | E    |
| $9g^2 G_{7/2}$  | $5f^2 F_{7/2}$  | 512.76          | 9.188e-03  |                | 1.551e-02 | 1.707e-02  |               |               |               | 2.914e+07 | E    |
| $9g^2 G_{7/2}$  | $6f^2 F_{7/2}$  | 918.32          | 2.148e-02  |                | 6.493e-02 | 6.938e-02  |               |               |               | 2.124e+07 | D    |
| $9g^2 G_{7/2}$  | $7f^2 F_{7/2}$  | 1755.68         | 5.548e-02  |                | 3.207e-01 | 3.359e-01  |               |               |               | 1.501e+07 | D+   |
| $9g^2 G_{7/2}$  | $8f^2 F_{7/2}$  | 4300.19         | 2.275e-01  |                | 3.220e+00 | 3.334e+00  |               |               |               | 1.026e+07 | C    |
| $9g^2 G_{7/2}$  | $6h^2 H_{9/2}$  | 922.71          | 2.671e-03  |                | 8.114e-03 | 8.740e-03  |               |               |               | 2.616e+06 | E    |
| $9g^2 G_{7/2}$  | $7h^2 H_{9/2}$  | 1766.43         | 2.667e-02  |                | 1.551e-01 | 1.596e-01  |               |               |               | 7.126e+06 | D+   |
| $9g^2 G_{7/2}$  | $8h^2 H_{9/2}$  | 4345.25         | 3.107e-01  |                | 4.444e+00 | 4.463e+00  |               |               |               | 1.372e+07 | C    |
| $9g^2 G_{9/2}$  | $4f^2 F_{7/2}$  | 282.91          | 1.118e-01  |                | 1.041e-01 | 1.213e-01  |               |               |               | 9.313e+08 | D+   |
| $9g^2 G_{9/2}$  | $5f^2 F_{7/2}$  | 512.75          | 3.217e-01  |                | 5.430e-01 | 5.977e-01  |               |               |               | 8.161e+08 | C    |
| $9g^2 G_{9/2}$  | $6f^2 F_{7/2}$  | 918.31          | 7.518e-01  |                | 2.273e+00 | 2.428e+00  |               |               |               | 5.947e+08 | C+   |
| $9g^2 G_{9/2}$  | $7f^2 F_{7/2}$  | 1755.63         | 1.942e+00  |                | 1.122e+01 | 1.176e+01  |               |               |               | 4.202e+08 | B    |
| $9g^2 G_{9/2}$  | $8f^2 F_{7/2}$  | 4299.90         | 7.958e+00  |                | 1.127e+02 | 1.167e+02  |               |               |               | 2.871e+08 | C    |
| $9g^2 G_{9/2}$  | $6h^2 H_{11/2}$ | 922.73          | 3.277e-03  |                | 9.955e-03 | 1.072e-02  |               |               |               | 2.567e+06 | E    |
| $9g^2 G_{9/2}$  | $7h^2 H_{11/2}$ | 1766.45         | 3.271e-02  |                | 1.902e-01 | 1.958e-01  |               |               |               | 6.993e+06 | D+   |
| $9g^2 G_{9/2}$  | $8h^2 H_{11/2}$ | 4345.26         | 3.812e-01  |                | 5.453e+00 | 5.475e+00  |               |               |               | 1.347e+07 | C    |
| $9h^2 H_{11/2}$ | $5g^2 G_{9/2}$  | 514.62          | 2.526e-01  |                | 4.279e-01 | 4.365e-01  |               |               |               | 5.302e+08 | C    |
| $9h^2 H_{11/2}$ | $6g^2 G_{9/2}$  | 922.11          | 9.110e-01  |                | 2.766e+00 | 2.796e+00  |               |               |               | 5.955e+08 | C+   |
| $9h^2 H_{11/2}$ | $7g^2 G_{9/2}$  | 1764.69         | 2.851e+00  |                | 1.656e+01 | 1.668e+01  |               |               |               | 5.088e+08 | B    |
| $9h^2 H_{11/2}$ | $8g^2 G_{9/2}$  | 4336.52         | 1.307e+01  |                | 1.867e+02 | 1.878e+02  |               |               |               | 3.865e+08 | C    |
| $9h^2 H_{11/2}$ | $7i^2 I_{13/2}$ | 1766.13         | 9.979e-03  |                | 5.802e-02 | 5.817e-02  |               |               |               | 1.778e+06 | D    |

Table S1 – continued from previous page

| Upper level      | Lower level      | $\lambda$ [RCI] | $gf$ [RCI] | $gf$ Ref. [17] | $S$ [RCI] | $S$ [MBPT] | $S$ Ref. [48] | $S$ Ref. [20] | $S$ Ref. [22] | $A$ [RCI] | Unc. |
|------------------|------------------|-----------------|------------|----------------|-----------|------------|---------------|---------------|---------------|-----------|------|
| $9h\ ^2H_{11/2}$ | $8i\ ^2I_{13/2}$ | 4342.60         | 2.127e-01  |                | 3.041e+00 | 3.036e+00  |               |               |               | 6.271e+06 | C    |
| $9h\ ^2H_{9/2}$  | $5g\ ^2G_{7/2}$  | 514.60          | 2.058e-01  |                | 3.487e-01 | 3.557e-01  |               |               |               | 5.185e+08 | C    |
| $9h\ ^2H_{9/2}$  | $6g\ ^2G_{7/2}$  | 922.07          | 7.423e-01  |                | 2.253e+00 | 2.278e+00  |               |               |               | 5.824e+08 | C+   |
| $9h\ ^2H_{9/2}$  | $7g\ ^2G_{7/2}$  | 1764.62         | 2.323e+00  |                | 1.349e+01 | 1.359e+01  |               |               |               | 4.975e+08 | B    |
| $9h\ ^2H_{9/2}$  | $8g\ ^2G_{7/2}$  | 4336.30         | 1.065e+01  |                | 1.521e+02 | 1.530e+02  |               |               |               | 3.779e+08 | C    |
| $9h\ ^2H_{9/2}$  | $5g\ ^2G_{9/2}$  | 514.63          | 4.676e-03  |                | 7.921e-03 | 8.080e-03  |               |               |               | 1.178e+07 | E    |
| $9h\ ^2H_{9/2}$  | $6g\ ^2G_{9/2}$  | 922.12          | 1.687e-02  |                | 5.120e-02 | 5.177e-02  |               |               |               | 1.323e+07 | D    |
| $9h\ ^2H_{9/2}$  | $7g\ ^2G_{9/2}$  | 1764.72         | 5.278e-02  |                | 3.067e-01 | 3.089e-01  |               |               |               | 1.131e+07 | D+   |
| $9h\ ^2H_{9/2}$  | $8g\ ^2G_{9/2}$  | 4336.71         | 2.422e-01  |                | 3.457e+00 | 3.479e+00  |               |               |               | 8.589e+06 | C    |
| $9h\ ^2H_{9/2}$  | $7i\ ^2I_{11/2}$ | 1766.11         | 8.425e-03  |                | 4.898e-02 | 4.911e-02  |               |               |               | 1.802e+06 | D    |
| $9h\ ^2H_{9/2}$  | $8i\ ^2I_{11/2}$ | 4342.59         | 1.796e-01  |                | 2.568e+00 | 2.563e+00  |               |               |               | 6.354e+06 | C    |
| $9i\ ^2I_{11/2}$ | $6h\ ^2H_{9/2}$  | 922.50          | 5.971e-01  |                | 1.813e+00 | 1.817e+00  |               |               |               | 3.900e+08 | C+   |
| $9i\ ^2I_{11/2}$ | $7h\ ^2H_{9/2}$  | 1765.65         | 2.976e+00  |                | 1.730e+01 | 1.731e+01  |               |               |               | 5.305e+08 | B    |
| $9i\ ^2I_{11/2}$ | $8h\ ^2H_{9/2}$  | 4340.51         | 1.683e+01  |                | 2.405e+02 | 2.409e+02  |               |               |               | 4.966e+08 | C    |
| $9i\ ^2I_{11/2}$ | $6h\ ^2H_{11/2}$ | 922.53          | 9.183e-03  |                | 2.789e-02 | 2.795e-02  |               |               |               | 5.998e+06 | E    |
| $9i\ ^2I_{11/2}$ | $7h\ ^2H_{11/2}$ | 1765.72         | 4.577e-02  |                | 2.661e-01 | 2.663e-01  |               |               |               | 8.160e+06 | D+   |
| $9i\ ^2I_{11/2}$ | $8h\ ^2H_{11/2}$ | 4340.82         | 2.590e-01  |                | 3.701e+00 | 3.706e+00  |               |               |               | 7.640e+06 | C    |
| $9i\ ^2I_{13/2}$ | $6h\ ^2H_{11/2}$ | 922.52          | 7.073e-01  |                | 2.148e+00 | 2.153e+00  |               |               |               | 3.959e+08 | C+   |
| $9i\ ^2I_{13/2}$ | $7h\ ^2H_{11/2}$ | 1765.70         | 3.525e+00  |                | 2.049e+01 | 2.051e+01  |               |               |               | 5.387e+08 | B    |
| $9i\ ^2I_{13/2}$ | $8h\ ^2H_{11/2}$ | 4340.67         | 1.994e+01  |                | 2.849e+02 | 2.853e+02  |               |               |               | 5.042e+08 | C    |
| $9p\ ^2P_{1/2}$  | $3s\ ^2S_{1/2}$  | 93.95           | 3.783e-03  |                | 1.170e-03 | 2.034e-03  |               |               |               | 1.429e+09 | E    |
| $9p\ ^2P_{1/2}$  | $4s\ ^2S_{1/2}$  | 205.09          | 6.222e-03  |                | 4.201e-03 | 6.869e-03  |               |               |               | 4.933e+08 | E    |
| $9p\ ^2P_{1/2}$  | $5s\ ^2S_{1/2}$  | 390.42          | 1.024e-02  |                | 1.316e-02 | 1.899e-02  |               |               |               | 2.240e+08 | E    |
| $9p\ ^2P_{1/2}$  | $6s\ ^2S_{1/2}$  | 714.78          | 1.799e-02  |                | 4.234e-02 | 5.470e-02  |               |               |               | 1.175e+08 | D    |
| $9p\ ^2P_{1/2}$  | $7s\ ^2S_{1/2}$  | 1363.94         | 3.654e-02  |                | 1.641e-01 | 1.914e-01  |               |               |               | 6.550e+07 | D+   |
| $9p\ ^2P_{1/2}$  | $8s\ ^2S_{1/2}$  | 3162.21         | 9.828e-02  |                | 1.023e+00 | 1.071e+00  |               |               |               | 3.278e+07 | C    |
| $9p\ ^2P_{1/2}$  | $3d\ ^2D_{3/2}$  | 136.76          | 1.325e-03  |                | 5.963e-04 | 1.561e-03  |               |               |               | 2.362e+08 | E    |
| $9p\ ^2P_{1/2}$  | $4d\ ^2D_{3/2}$  | 273.21          | 5.682e-03  |                | 5.111e-03 | 9.860e-03  |               |               |               | 2.539e+08 | E    |
| $9p\ ^2P_{1/2}$  | $5d\ ^2D_{3/2}$  | 504.69          | 1.744e-02  |                | 2.898e-02 | 4.520e-02  |               |               |               | 2.284e+08 | E    |
| $9p\ ^2P_{1/2}$  | $6d\ ^2D_{3/2}$  | 928.06          | 5.199e-02  |                | 1.589e-01 | 2.158e-01  |               |               |               | 2.013e+08 | D+   |
| $9p\ ^2P_{3/2}$  | $3s\ ^2S_{1/2}$  | 93.95           | 7.417e-03  |                | 2.294e-03 | 4.004e-03  |               |               |               | 1.401e+09 | E    |
| $9p\ ^2P_{3/2}$  | $4s\ ^2S_{1/2}$  | 205.06          | 1.214e-02  |                | 8.198e-03 | 1.348e-02  |               |               |               | 4.816e+08 | E    |
| $9p\ ^2P_{3/2}$  | $5s\ ^2S_{1/2}$  | 390.31          | 1.991e-02  |                | 2.559e-02 | 3.708e-02  |               |               |               | 2.180e+08 | E    |
| $9p\ ^2P_{3/2}$  | $6s\ ^2S_{1/2}$  | 714.40          | 3.484e-02  |                | 8.194e-02 | 1.062e-01  |               |               |               | 1.138e+08 | D+   |
| $9p\ ^2P_{3/2}$  | $7s\ ^2S_{1/2}$  | 1362.55         | 7.031e-02  |                | 3.154e-01 | 3.689e-01  |               |               |               | 6.316e+07 | D+   |
| $9p\ ^2P_{3/2}$  | $8s\ ^2S_{1/2}$  | 3154.75         | 1.865e-01  |                | 1.937e+00 | 2.029e+00  |               |               |               | 3.125e+07 | C    |
| $9p\ ^2P_{3/2}$  | $3d\ ^2D_{3/2}$  | 136.74          | 2.634e-04  |                | 1.186e-04 | 3.131e-04  |               |               |               | 2.349e+07 | E    |
| $9p\ ^2P_{3/2}$  | $4d\ ^2D_{3/2}$  | 273.15          | 1.130e-03  |                | 1.017e-03 | 1.970e-03  |               |               |               | 2.527e+07 | E    |
| $9p\ ^2P_{3/2}$  | $5d\ ^2D_{3/2}$  | 504.50          | 3.473e-03  |                | 5.768e-03 | 9.010e-03  |               |               |               | 2.275e+07 | E    |

Table S1 – continued from previous page

| Upper level   | Lower level   | $\lambda$ [RCI] | $gf$ [RCI] | $gf$ Ref. [17] | $S$ [RCI] | $S$ [MBPT] | $S$ Ref. [48] | $S$ Ref. [20] | $S$ Ref. [22] | $A$ [RCI] | Unc. |
|---------------|---------------|-----------------|------------|----------------|-----------|------------|---------------|---------------|---------------|-----------|------|
| $9p^2P_{3/2}$ | $6d^2D_{3/2}$ | 927.42          | 1.035e-02  | 3.160e-02      | 4.295e-02 |            |               |               |               | 2.007e+07 | E    |
| $9p^2P_{3/2}$ | $3d^2D_{5/2}$ | 136.76          | 3.438e-03  | 1.548e-03      | 2.790e-03 |            |               |               |               | 3.065e+08 | E    |
| $9p^2P_{3/2}$ | $4d^2D_{5/2}$ | 273.19          | 1.271e-02  | 1.143e-02      | 1.764e-02 |            |               |               |               | 2.839e+08 | E    |
| $9p^2P_{3/2}$ | $5d^2D_{5/2}$ | 504.58          | 3.628e-02  | 6.027e-02      | 8.090e-02 |            |               |               |               | 2.376e+08 | D    |
| $9p^2P_{3/2}$ | $6d^2D_{5/2}$ | 927.55          | 1.044e-01  | 3.187e-01      | 3.862e-01 |            |               |               |               | 2.023e+08 | D+   |
| $9p^2P_{3/2}$ | $7d^2D_{5/2}$ | 1862.06         | 3.789e-01  | 2.323e+00      | 2.595e+00 |            |               |               |               | 1.822e+08 | C+   |
| $9p^2P_{3/2}$ | $8d^2D_{5/2}$ | 5324.52         | 3.207e+00  | 5.622e+01      | 5.828e+01 |            |               |               |               | 1.887e+08 | D+   |

Table S2: Wavelengths ( $\lambda$ , in Å) in vacuum, weighted oscillator strengths ( $gf$ , dimensionless), line strengths ( $S$ , in atomic units) and transition rates ( $A$ , in  $s^{-1}$ ) for E1 transitions from the present (RCI and MBPT) and previous results of Sampson et al. [24], Liang et al. [22], and NIST ASD [48] for Kr<sup>25+</sup>. The estimated uncertainty (Unc.) in the  $A$  values are presented in the last column.

| Upper level   | Lower level   | $\lambda$ [RCI] | $\lambda$ Ref. [48] | $S$ [RCI] | $S$ [MBPT] | $S$ Ref. [22] | $gf$ [RCI] | $gf$ Ref. [24] | $A$ [RCI] | Unc. |
|---------------|---------------|-----------------|---------------------|-----------|------------|---------------|------------|----------------|-----------|------|
| $3d^2D_{3/2}$ | $3p^2P_{1/2}$ | 141.06          | 140.89              | 1.829e-01 | 1.879e-01  | 1.860e-01     | 3.939e-01  | 4.030e-01      | 3.301e+10 | A    |
| $3d^2D_{3/2}$ | $3p^2P_{3/2}$ | 165.54          | 165.16              | 3.657e-02 | 3.752e-02  | 3.751e-02     | 6.710e-02  | 6.880e-02      | 4.083e+09 | A    |
| $3d^2D_{5/2}$ | $3p^2P_{3/2}$ | 160.13          | 159.92              | 3.311e-01 | 3.398e-01  | 3.384e-01     | 6.280e-01  | 6.432e-01      | 2.723e+10 | A    |
| $3p^2P_{1/2}$ | $3s^2S_{1/2}$ | 220.20          | 220.06              | 1.208e-01 | 1.238e-01  | 1.239e-01     | 1.667e-01  | 1.706e-01      | 1.146e+10 | A    |
| $3p^2P_{3/2}$ | $3s^2S_{1/2}$ | 178.90          | 178.99              | 2.455e-01 | 2.516e-01  | 2.513e-01     | 4.169e-01  | 4.266e-01      | 2.172e+10 | A    |
| $4d^2D_{3/2}$ | $3p^2P_{1/2}$ | 22.27           | 22.26               | 5.663e-02 | 5.663e-02  | 5.616e-02     | 7.726e-01  | 7.618e-01      | 2.599e+12 | A+   |
| $4d^2D_{3/2}$ | $4p^2P_{1/2}$ | 373.52          |                     | 8.052e-01 | 8.099e-01  | 8.128e-01     | 6.548e-01  | 1.652e-01      | 7.826e+09 | B+   |
| $4d^2D_{3/2}$ | $3p^2P_{3/2}$ | 22.80           |                     | 1.252e-02 | 1.253e-02  | 1.232e-02     | 1.668e-01  | 1.652e-01      | 5.351e+11 | A    |
| $4d^2D_{3/2}$ | $4p^2P_{3/2}$ | 442.42          |                     | 1.612e-01 | 1.621e-01  | 1.625e-01     | 1.107e-01  | 1.461e+00      | 9.430e+08 | B+   |
| $4d^2D_{5/2}$ | $3p^2P_{3/2}$ | 22.75           | 22.74               | 1.106e-01 | 1.107e-01  | 1.093e-01     | 1.476e+00  | 1.461e+00      | 3.171e+12 | A+   |
| $4d^2D_{5/2}$ | $4p^2P_{3/2}$ | 425.63          |                     | 1.457e+00 | 1.465e+00  | 1.467e+00     | 1.040e+00  | 1.461e+00      | 6.381e+09 | B+   |
| $4f^2F_{5/2}$ | $3d^2D_{3/2}$ | 25.62           | 25.62               | 3.129e-01 | 3.198e-01  | 3.174e-01     | 3.709e+00  | 3.709e+00      | 6.282e+12 | A    |
| $4f^2F_{5/2}$ | $3d^2D_{5/2}$ | 25.75           |                     | 2.256e-02 | 2.306e-02  | 2.290e-02     | 2.660e-01  | 2.658e-01      | 4.459e+11 | A    |
| $4f^2F_{7/2}$ | $3d^2D_{5/2}$ | 25.73           | 25.73               | 4.504e-01 | 4.604e-01  | 4.579e-01     | 5.317e+00  | 5.332e+00      | 6.696e+12 | A    |
| $4p^2P_{1/2}$ | $3s^2S_{1/2}$ | 21.38           | 21.37               | 1.432e-02 | 1.410e-02  | 1.365e-02     | 2.034e-01  | 2.054e-01      | 1.484e+12 | A    |
| $4p^2P_{1/2}$ | $4s^2S_{1/2}$ | 538.09          |                     | 4.396e-01 | 4.421e-01  | 4.477e-01     | 2.482e-01  |                | 2.859e+09 | B+   |
| $4p^2P_{1/2}$ | $3d^2D_{3/2}$ | 28.45           |                     | 9.745e-03 | 9.392e-03  | 9.282e-03     | 1.040e-01  | 1.000e-01      | 4.286e+11 | B+   |
| $4p^2P_{3/2}$ | $3s^2S_{1/2}$ | 21.19           | 21.18               | 2.525e-02 | 2.481e-02  | 2.439e-02     | 3.619e-01  | 3.640e-01      | 1.344e+12 | A+   |
| $4p^2P_{3/2}$ | $4s^2S_{1/2}$ | 439.49          |                     | 8.882e-01 | 8.932e-01  | 8.982e-01     | 6.139e-01  |                | 5.300e+09 | B+   |
| $4p^2P_{3/2}$ | $3d^2D_{3/2}$ | 28.12           |                     | 1.696e-03 | 1.633e-03  | 1.604e-03     | 1.832e-02  | 1.760e-02      | 3.864e+10 | B+   |
| $4p^2P_{3/2}$ | $3d^2D_{5/2}$ | 28.28           |                     | 1.585e-02 | 1.521e-02  | 1.517e-02     | 1.702e-01  | 1.632e-01      | 3.549e+11 | B+   |
| $4s^2S_{1/2}$ | $3p^2P_{1/2}$ | 24.77           | 24.77               | 8.748e-03 | 8.560e-03  | 7.975e-03     | 1.073e-01  | 1.000e-01      | 5.834e+11 | A    |
| $4s^2S_{1/2}$ | $3p^2P_{3/2}$ | 25.43           | 25.42               | 2.040e-02 | 1.997e-02  | 1.893e-02     | 2.437e-01  | 2.292e-01      | 1.257e+12 | A    |

Table S2 – continued from previous page

| Upper level   | Lower level   | $\lambda$ [RCI] | $\lambda$ Ref. [48] | $S$ [RCI] | $S$ [MBPT] | $S$ Ref. [22] | $g_f$ [RCI] | $g_f$ Ref. [24] | $A$ [RCI] | Unc. |
|---------------|---------------|-----------------|---------------------|-----------|------------|---------------|-------------|-----------------|-----------|------|
| $5d^2D_{3/2}$ | $3p^2P_{1/2}$ | 16.06           | 16.07               | 1.171e-02 | 1.186e-02  | 1.124e-02     | 2.216e-01   | 2.222e-01       | 1.432e+12 | A    |
| $5d^2D_{3/2}$ | $4p^2P_{1/2}$ | 49.93           | 49.93               | 1.137e-01 | 1.137e-01  | 1.110e-01     | 6.919e-01   |                 | 4.628e+11 | A+   |
| $5d^2D_{3/2}$ | $5p^2P_{1/2}$ | 765.14          |                     | 2.222e+00 | 2.226e+00  | 2.246e+00     | 8.823e-01   |                 | 2.513e+09 | C+   |
| $5d^2D_{3/2}$ | $3p^2P_{3/2}$ | 16.34           |                     | 2.480e-03 | 2.514e-03  | 2.411e-03     | 4.612e-02   | 4.640e-02       | 2.882e+11 | B+   |
| $5d^2D_{3/2}$ | $4p^2P_{3/2}$ | 50.99           |                     | 2.563e-02 | 2.562e-02  | 2.500e-02     | 1.527e-01   |                 | 9.793e+10 | A+   |
| $5d^2D_{3/2}$ | $5p^2P_{3/2}$ | 909.49          |                     | 4.455e-01 | 4.462e-01  | 4.477e-01     | 1.488e-01   |                 | 2.999e+08 | C+   |
| $5d^2D_{3/2}$ | $4f^2F_{5/2}$ | 61.95           |                     | 1.868e-02 | 1.877e-02  | 1.841e-02     | 9.160e-02   |                 | 3.980e+10 | A    |
| $5d^2D_{5/2}$ | $3p^2P_{3/2}$ | 16.32           | 16.34               | 2.216e-02 | 2.242e-02  | 2.176e-02     | 4.124e-01   | 4.152e-01       | 1.721e+12 | A+   |
| $5d^2D_{5/2}$ | $4p^2P_{3/2}$ | 50.86           | 50.86               | 2.250e-01 | 2.250e-01  | 2.205e-01     | 1.344e+00   |                 | 5.777e+11 | A+   |
| $5d^2D_{5/2}$ | $5p^2P_{3/2}$ | 869.28          |                     | 4.020e+00 | 4.027e+00  | 4.044e+00     | 1.405e+00   |                 | 2.067e+09 | C+   |
| $5d^2D_{5/2}$ | $4f^2F_{5/2}$ | 61.75           |                     | 1.280e-03 | 1.286e-03  | 1.260e-03     | 6.298e-03   |                 | 1.836e+09 | B+   |
| $5d^2D_{5/2}$ | $4f^2F_{7/2}$ | 61.89           |                     | 2.608e-02 | 2.618e-02  | 2.587e-02     | 1.280e-01   |                 | 3.715e+10 | A+   |
| $5f^2F_{5/2}$ | $3d^2D_{3/2}$ | 17.93           | 17.94               | 3.807e-02 | 3.981e-02  | 3.928e-02     | 6.450e-01   | 6.700e-01       | 2.231e+12 | B+   |
| $5f^2F_{5/2}$ | $4d^2D_{3/2}$ | 55.70           | 55.71               | 5.577e-01 | 5.609e-01  | 5.554e-01     | 3.041e+00   |                 | 1.090e+12 | A+   |
| $5f^2F_{5/2}$ | $3d^2D_{5/2}$ | 17.99           |                     | 2.712e-03 | 2.840e-03  | 2.803e-03     | 4.578e-02   | 4.740e-02       | 1.572e+11 | B+   |
| $5f^2F_{5/2}$ | $4d^2D_{5/2}$ | 55.98           |                     | 4.052e-02 | 4.072e-02  | 4.024e-02     | 2.199e-01   | 9.576e-01       | 7.800e+10 | A+   |
| $5f^2F_{7/2}$ | $3d^2D_{5/2}$ | 17.99           | 17.99               | 5.441e-02 | 5.698e-02  | 5.659e-02     | 9.188e-01   |                 | 2.367e+12 | B+   |
| $5f^2F_{7/2}$ | $4d^2D_{5/2}$ | 55.92           | 55.93               | 8.063e-01 | 8.102e-01  | 8.045e-01     | 4.380e+00   |                 | 1.168e+12 | A+   |
| $5g^2G_{7/2}$ | $4f^2F_{5/2}$ | 59.42           | 59.38               | 1.558e+00 | 1.568e+00  | 1.567e+00     | 7.967e+00   |                 | 1.882e+12 | A+   |
| $5g^2G_{7/2}$ | $4f^2F_{7/2}$ | 59.54           |                     | 5.788e-02 | 5.824e-02  | 5.822e-02     | 2.953e-01   |                 | 6.946e+10 | A+   |
| $5g^2G_{9/2}$ | $4f^2F_{7/2}$ | 59.51           | 59.46               | 2.024e+00 | 2.037e+00  | 2.040e+00     | 1.033e+01   | 5.860e-02       | 1.946e+12 | A+   |
| $5p^2P_{1/2}$ | $3s^2S_{1/2}$ | 15.27           |                     | 2.935e-03 | 2.911e-03  | 2.532e-03     | 5.838e-02   |                 | 8.353e+11 | B+   |
| $5p^2P_{1/2}$ | $4s^2S_{1/2}$ | 48.59           | 48.59               | 3.488e-02 | 3.473e-02  | 3.300e-02     | 2.180e-01   |                 | 3.080e+11 | A+   |
| $5p^2P_{1/2}$ | $5s^2S_{1/2}$ | 1074.40         |                     | 1.146e+00 | 1.147e+00  | 1.165e+00     | 3.239e-01   |                 | 9.357e+08 | C+   |
| $5p^2P_{1/2}$ | $3d^2D_{3/2}$ | 18.56           |                     | 1.125e-03 | 1.050e-03  | 9.627e-04     | 1.841e-02   | 1.720e-02       | 1.782e+11 | B    |
| $5p^2P_{1/2}$ | $4d^2D_{3/2}$ | 62.33           |                     | 4.818e-02 | 4.787e-02  | 4.593e-02     | 2.348e-01   |                 | 2.016e+11 | A+   |
| $5p^2P_{3/2}$ | $3s^2S_{1/2}$ | 15.22           | 15.21               | 5.387e-03 | 5.325e-03  | 4.821e-03     | 1.075e-01   | 1.076e-01       | 7.741e+11 | A    |
| $5p^2P_{3/2}$ | $4s^2S_{1/2}$ | 48.11           | 48.11               | 6.066e-02 | 6.035e-02  | 5.895e-02     | 3.830e-01   |                 | 2.760e+11 | A+   |
| $5p^2P_{3/2}$ | $5s^2S_{1/2}$ | 878.59          |                     | 2.306e+00 | 2.309e+00  | 2.326e+00     | 7.972e-01   |                 | 1.722e+09 | C+   |
| $5p^2P_{3/2}$ | $3d^2D_{3/2}$ | 18.49           |                     | 2.020e-04 | 1.877e-04  | 1.706e-04     | 3.318e-03   | 3.200e-03       | 1.618e+10 | B    |
| $5p^2P_{3/2}$ | $4d^2D_{3/2}$ | 61.53           |                     | 8.432e-03 | 8.377e-03  | 8.187e-03     | 4.163e-02   |                 | 1.833e+10 | A    |
| $5p^2P_{3/2}$ | $3d^2D_{5/2}$ | 18.56           |                     | 1.855e-03 | 1.733e-03  | 1.651e-03     | 3.035e-02   | 2.880e-02       | 1.469e+11 | B    |
| $5p^2P_{3/2}$ | $4d^2D_{5/2}$ | 61.87           |                     | 7.876e-02 | 7.801e-02  | 7.716e-02     | 3.867e-01   |                 | 1.684e+11 | A+   |
| $5s^2S_{1/2}$ | $3p^2P_{1/2}$ | 16.66           |                     | 1.253e-03 | 1.220e-03  | 9.577e-04     | 2.284e-02   | 2.120e-02       | 2.744e+11 | B+   |
| $5s^2S_{1/2}$ | $4p^2P_{1/2}$ | 56.21           |                     | 3.269e-02 | 3.265e-02  | 3.035e-02     | 1.767e-01   |                 | 1.865e+11 | A+   |
| $5s^2S_{1/2}$ | $3p^2P_{3/2}$ | 16.96           |                     | 2.813e-03 | 2.747e-03  | 2.411e-03     | 5.039e-02   | 4.720e-02       | 5.845e+11 | B+   |
| $5s^2S_{1/2}$ | $4p^2P_{3/2}$ | 57.56           |                     | 7.534e-02 | 7.519e-02  | 7.074e-02     | 3.976e-01   |                 | 4.002e+11 | A+   |
| $6d^2D_{3/2}$ | $3p^2P_{1/2}$ | 13.96           |                     | 4.469e-03 | 4.584e-03  | 3.698e-03     | 9.724e-02   |                 | 8.319e+11 | B+   |
| $6d^2D_{3/2}$ | $4p^2P_{1/2}$ | 34.02           |                     | 2.402e-02 | 2.417e-02  | 2.120e-02     | 2.144e-01   |                 | 3.089e+11 | A+   |

Table S2 – continued from previous page

| Upper level    | Lower level   | $\lambda$ [RCI] | $\lambda$ Ref. [48] | $S$ [RCI] | $S$ [MBPT] | $S$ Ref. [22] | $gf$ [RCI] | $gf$ Ref. [24] | $A$ [RCI] | Unc. |
|----------------|---------------|-----------------|---------------------|-----------|------------|---------------|------------|----------------|-----------|------|
| $6d^2D_{3/2}$  | $5p^2P_{1/2}$ | 93.71           |                     | 2.051e-01 | 2.050e-01  | 1.936e-01     | 6.649e-01  |                | 1.263e+11 | A+   |
| $6d^2D_{3/2}$  | $6p^2P_{1/2}$ | 1359.22         |                     | 4.900e+00 | 4.901e+00  | 5.024e+00     | 1.095e+00  |                | 9.884e+08 | C    |
| $6d^2D_{3/2}$  | $3p^2P_{3/2}$ | 14.17           |                     | 9.312e-04 | 9.565e-04  | 8.541e-04     | 1.996e-02  |                | 1.658e+11 | B+   |
| $6d^2D_{3/2}$  | $4p^2P_{3/2}$ | 34.51           |                     | 5.180e-03 | 5.210e-03  | 4.815e-03     | 4.559e-02  |                | 6.383e+10 | A    |
| $6d^2D_{3/2}$  | $5p^2P_{3/2}$ | 95.57           |                     | 4.683e-02 | 4.693e-02  | 4.492e-02     | 1.488e-01  |                | 2.717e+10 | A    |
| $6d^2D_{3/2}$  | $4f^2F_{5/2}$ | 39.21           |                     | 2.009e-03 | 2.089e-03  | 1.763e-03     | 1.557e-02  |                | 1.689e+10 | B+   |
| $6d^2D_{3/2}$  | $5f^2F_{5/2}$ | 114.13          |                     | 8.462e-02 | 8.527e-02  | 8.210e-02     | 2.252e-01  |                | 2.883e+10 | A    |
| $6d^2D_{5/2}$  | $3p^2P_{3/2}$ | 14.16           |                     | 8.463e-03 | 8.558e-03  | 7.770e-03     | 1.815e-01  |                | 1.006e+12 | A    |
| $6d^2D_{5/2}$  | $4p^2P_{3/2}$ | 34.47           |                     | 4.637e-02 | 4.621e-02  | 4.326e-02     | 4.087e-01  |                | 3.824e+11 | A+   |
| $6d^2D_{5/2}$  | $5p^2P_{3/2}$ | 95.22           |                     | 4.095e-01 | 4.106e-01  | 3.957e-01     | 1.306e+00  |                | 1.601e+11 | A    |
| $6d^2D_{5/2}$  | $6p^2P_{3/2}$ | 1522.45         |                     | 8.848e+00 | 8.868e+00  | 8.965e+00     | 1.765e+00  |                | 8.467e+08 | C    |
| $6d^2D_{5/2}$  | $4f^2F_{5/2}$ | 39.15           |                     | 1.409e-04 | 1.438e-04  | 1.222e-04     | 1.094e-03  |                | 7.933e+08 | C+   |
| $6d^2D_{5/2}$  | $5f^2F_{5/2}$ | 113.63          |                     | 5.771e-03 | 5.855e-03  | 5.644e-03     | 1.543e-02  |                | 1.328e+09 | B+   |
| $6d^2D_{5/2}$  | $4f^2F_{7/2}$ | 39.20           |                     | 2.865e-03 | 2.917e-03  | 2.594e-03     | 2.220e-02  |                | 1.606e+10 | B+   |
| $6d^2D_{5/2}$  | $5f^2F_{7/2}$ | 113.86          |                     | 1.174e-01 | 1.191e-01  | 1.162e-01     | 3.133e-01  |                | 2.687e+10 | A    |
| $6f^2F_{5/2}$  | $3d^2D_{3/2}$ | 15.41           |                     | 1.172e-02 | 1.248e-02  | 1.189e-02     | 2.310e-01  |                | 1.081e+12 | B+   |
| $6f^2F_{5/2}$  | $4d^2D_{3/2}$ | 36.96           |                     | 8.765e-02 | 8.887e-02  | 8.587e-02     | 7.204e-01  |                | 5.863e+11 | A+   |
| $6f^2F_{5/2}$  | $5d^2D_{3/2}$ | 103.02          |                     | 9.360e-01 | 9.397e-01  | 9.194e-01     | 2.760e+00  |                | 2.891e+11 | A    |
| $6f^2F_{5/2}$  | $3d^2D_{5/2}$ | 15.46           |                     | 8.257e-04 | 8.866e-04  | 8.558e-04     | 1.622e-02  |                | 7.544e+10 | B    |
| $6f^2F_{5/2}$  | $4d^2D_{5/2}$ | 37.08           |                     | 6.312e-03 | 6.380e-03  | 6.203e-03     | 5.171e-02  |                | 4.181e+10 | A    |
| $6f^2F_{5/2}$  | $5d^2D_{5/2}$ | 103.56          |                     | 6.867e-02 | 6.850e-02  | 6.707e-02     | 2.014e-01  |                | 2.088e+10 | A    |
| $6f^2F_{5/2}$  | $5g^2G_{7/2}$ | 110.88          |                     | 2.340e-02 | 2.331e-02  | 2.241e-02     | 6.412e-02  |                | 5.798e+09 | A    |
| $6f^2F_{7/2}$  | $3d^2D_{5/2}$ | 15.46           |                     | 1.659e-02 | 1.782e-02  | 1.731e-02     | 3.260e-01  |                | 1.137e+12 | B    |
| $6f^2F_{7/2}$  | $4d^2D_{5/2}$ | 37.07           |                     | 1.262e-01 | 1.275e-01  | 1.245e-01     | 1.034e+00  |                | 6.275e+11 | A+   |
| $6f^2F_{7/2}$  | $5d^2D_{5/2}$ | 103.45          |                     | 1.364e+00 | 1.360e+00  | 1.335e+00     | 4.004e+00  |                | 3.120e+11 | A    |
| $6f^2F_{7/2}$  | $5g^2G_{9/2}$ | 110.87          |                     | 2.987e-02 | 2.998e-02  | 2.918e-02     | 8.185e-02  |                | 5.552e+09 | A    |
| $6g^2G_{7/2}$  | $4f^2F_{5/2}$ | 38.60           |                     | 1.388e-01 | 1.407e-01  | 1.396e-01     | 1.092e+00  |                | 6.112e+11 | A+   |
| $6g^2G_{7/2}$  | $5f^2F_{5/2}$ | 109.18          |                     | 2.506e+00 | 2.514e+00  | 2.503e+00     | 6.971e+00  |                | 4.876e+11 | A    |
| $6g^2G_{7/2}$  | $4f^2F_{7/2}$ | 38.66           |                     | 5.129e-03 | 5.196e-03  | 5.158e-03     | 4.030e-02  |                | 2.249e+10 | A    |
| $6g^2G_{7/2}$  | $5f^2F_{7/2}$ | 109.39          |                     | 9.328e-02 | 9.360e-02  | 9.308e-02     | 2.590e-01  |                | 1.805e+10 | A    |
| $6g^2G_{9/2}$  | $4f^2F_{7/2}$ | 38.65           |                     | 1.798e-01 | 1.824e-01  | 1.813e-01     | 1.413e+00  |                | 6.312e+11 | A+   |
| $6g^2G_{9/2}$  | $5f^2F_{7/2}$ | 109.32          |                     | 3.257e+00 | 3.268e+00  | 3.258e+00     | 9.050e+00  |                | 5.051e+11 | A    |
| $6h^2H_{11/2}$ | $5g^2G_{9/2}$ | 110.16          |                     | 5.950e+00 | 5.963e+00  | 5.961e+00     | 1.641e+01  |                | 7.515e+11 | A    |
| $6h^2H_{9/2}$  | $5g^2G_{7/2}$ | 110.10          |                     | 4.844e+00 | 4.853e+00  | 4.851e+00     | 1.337e+01  |                | 7.355e+11 | A    |
| $6h^2H_{9/2}$  | $5g^2G_{9/2}$ | 110.21          |                     | 1.102e-01 | 1.105e-01  | 1.105e-01     | 3.038e-01  |                | 1.668e+10 | A    |
| $6p^2P_{1/2}$  | $3s^2S_{1/2}$ | 13.26           |                     | 1.132e-03 | 1.137e-03  | 7.316e-04     | 2.593e-02  |                | 4.920e+11 | B+   |
| $6p^2P_{1/2}$  | $4s^2S_{1/2}$ | 32.77           |                     | 6.894e-03 | 6.930e-03  | 5.421e-03     | 6.390e-02  |                | 1.984e+11 | A    |
| $6p^2P_{1/2}$  | $5s^2S_{1/2}$ | 92.03           |                     | 7.184e-02 | 7.187e-02  | 6.473e-02     | 2.371e-01  |                | 9.337e+10 | A    |
| $6p^2P_{1/2}$  | $6s^2S_{1/2}$ | 1896.72         |                     | 2.466e+00 | 2.466e+00  | 2.558e+00     | 3.950e-01  |                | 3.661e+08 | D+   |

Table S2 – continued from previous page

| Upper level   | Lower level   | $\lambda$ [RCI] | $\lambda$ Ref. [48] | $S$ [RCI] | $S$ [MBPT] | $S$ Ref. [22] | $gf$ [RCI] | $gf$ Ref. [24] | $A$ [RCI] | Unc. |
|---------------|---------------|-----------------|---------------------|-----------|------------|---------------|------------|----------------|-----------|------|
| $6p^2P_{1/2}$ | $3d^2D_{3/2}$ | 15.67           |                     | 3.526e-04 | 3.225e-04  | 2.311e-04     | 6.834e-03  |                | 9.279e+10 | B    |
| $6p^2P_{1/2}$ | $4d^2D_{3/2}$ | 38.49           |                     | 5.435e-03 | 5.390e-03  | 4.489e-03     | 4.289e-02  |                | 9.654e+10 | A    |
| $6p^2P_{1/2}$ | $5d^2D_{3/2}$ | 115.90          |                     | 1.454e-01 | 1.455e-01  | 1.354e-01     | 3.811e-01  |                | 9.462e+10 | A    |
| $6p^2P_{3/2}$ | $3s^2S_{1/2}$ | 13.24           |                     | 2.106e-03 | 2.108e-03  | 1.448e-03     | 4.833e-02  |                | 4.600e+11 | B+   |
| $6p^2P_{3/2}$ | $4s^2S_{1/2}$ | 32.65           |                     | 1.249e-02 | 1.254e-02  | 1.032e-02     | 1.163e-01  |                | 1.819e+11 | A    |
| $6p^2P_{3/2}$ | $5s^2S_{1/2}$ | 91.05           |                     | 1.239e-01 | 1.239e-01  | 1.160e-01     | 4.135e-01  |                | 8.317e+10 | A+   |
| $6p^2P_{3/2}$ | $6s^2S_{1/2}$ | 1551.34         |                     | 4.953e+00 | 4.954e+00  | 5.092e+00     | 9.698e-01  |                | 6.720e+08 | C    |
| $6p^2P_{3/2}$ | $3d^2D_{3/2}$ | 15.64           |                     | 6.390e-05 | 5.800e-05  | 4.110e-05     | 1.240e-03  |                | 8.449e+09 | C+   |
| $6p^2P_{3/2}$ | $4d^2D_{3/2}$ | 38.32           |                     | 9.805e-04 | 9.723e-04  | 8.398e-04     | 7.772e-03  |                | 8.826e+09 | B+   |
| $6p^2P_{3/2}$ | $5d^2D_{3/2}$ | 114.34          |                     | 2.556e-02 | 2.558e-02  | 2.457e-02     | 6.791e-02  |                | 8.661e+09 | A    |
| $6p^2P_{3/2}$ | $3d^2D_{5/2}$ | 15.69           |                     | 5.536e-04 | 5.333e-04  | 4.463e-04     | 1.071e-02  |                | 7.253e+10 | B+   |
| $6p^2P_{3/2}$ | $4d^2D_{5/2}$ | 38.45           |                     | 9.189e-03 | 8.972e-03  | 8.172e-03     | 7.259e-02  |                | 8.188e+10 | A    |
| $6p^2P_{3/2}$ | $5d^2D_{5/2}$ | 115.01          |                     | 2.417e-01 | 2.380e-01  | 2.316e-01     | 6.383e-01  |                | 8.047e+10 | A    |
| $6s^2S_{1/2}$ | $3p^2P_{1/2}$ | 14.21           |                     | 4.278e-04 | 4.226e-04  | 2.028e-04     | 9.143e-03  |                | 1.510e+11 | B    |
| $6s^2S_{1/2}$ | $4p^2P_{1/2}$ | 35.55           |                     | 4.354e-03 | 4.379e-03  | 3.224e-03     | 3.720e-02  |                | 9.817e+10 | B+   |
| $6s^2S_{1/2}$ | $5p^2P_{1/2}$ | 106.29          |                     | 8.709e-02 | 8.749e-02  | 7.856e-02     | 2.489e-01  |                | 7.346e+10 | A    |
| $6s^2S_{1/2}$ | $3p^2P_{3/2}$ | 14.43           |                     | 9.420e-04 | 9.379e-04  | 6.772e-04     | 1.983e-02  |                | 3.178e+11 | B+   |
| $6s^2S_{1/2}$ | $4p^2P_{3/2}$ | 36.09           |                     | 9.687e-03 | 9.723e-03  | 8.156e-03     | 8.154e-02  |                | 2.089e+11 | A    |
| $6s^2S_{1/2}$ | $5p^2P_{3/2}$ | 108.69          |                     | 1.995e-01 | 2.001e-01  | 1.843e-01     | 5.575e-01  |                | 1.574e+11 | A    |
| $7d^2D_{3/2}$ | $3p^2P_{1/2}$ | 12.94           |                     | 2.231e-03 | 2.329e-03  |               | 5.234e-02  |                | 5.209e+11 | B+   |
| $7d^2D_{3/2}$ | $4p^2P_{1/2}$ | 28.56           |                     | 9.279e-03 | 9.457e-03  |               | 9.870e-02  |                | 2.018e+11 | A    |
| $7d^2D_{3/2}$ | $5p^2P_{1/2}$ | 61.37           |                     | 4.291e-02 | 4.327e-02  |               | 2.124e-01  |                | 9.405e+10 | A+   |
| $7d^2D_{3/2}$ | $6p^2P_{1/2}$ | 157.23          |                     | 3.447e-01 | 3.446e-01  |               | 6.659e-01  |                | 4.492e+10 | A    |
| $7d^2D_{3/2}$ | $7p^2P_{1/2}$ | 2193.77         |                     | 9.394e+00 | 9.403e+00  |               | 1.301e+00  |                | 4.507e+08 | D+   |
| $7d^2D_{3/2}$ | $3p^2P_{3/2}$ | 13.12           |                     | 4.553e-04 | 4.814e-04  |               | 1.054e-02  |                | 1.021e+11 | B    |
| $7d^2D_{3/2}$ | $4p^2P_{3/2}$ | 28.90           |                     | 1.970e-03 | 2.003e-03  |               | 2.071e-02  |                | 4.133e+10 | B+   |
| $7d^2D_{3/2}$ | $5p^2P_{3/2}$ | 62.16           |                     | 9.365e-03 | 9.434e-03  |               | 4.577e-02  |                | 1.975e+10 | A    |
| $7d^2D_{3/2}$ | $6p^2P_{3/2}$ | 160.18          |                     | 7.913e-02 | 7.935e-02  |               | 1.501e-01  |                | 9.753e+09 | B+   |
| $7d^2D_{3/2}$ | $4f^2F_{5/2}$ | 32.12           |                     | 5.672e-04 | 6.478e-04  |               | 5.363e-03  |                | 8.667e+09 | C+   |
| $7d^2D_{3/2}$ | $5f^2F_{5/2}$ | 69.51           |                     | 9.313e-03 | 9.650e-03  |               | 4.070e-02  |                | 1.405e+10 | B+   |
| $7d^2D_{3/2}$ | $6f^2F_{5/2}$ | 189.34          |                     | 2.405e-01 | 2.422e-01  |               | 3.859e-01  |                | 1.795e+10 | B+   |
| $7d^2D_{5/2}$ | $3p^2P_{3/2}$ | 13.12           |                     | 4.109e-03 | 4.314e-03  |               | 9.512e-02  |                | 6.143e+11 | B+   |
| $7d^2D_{5/2}$ | $4p^2P_{3/2}$ | 28.89           |                     | 1.748e-02 | 1.783e-02  |               | 1.837e-01  |                | 2.447e+11 | A    |
| $7d^2D_{5/2}$ | $5p^2P_{3/2}$ | 62.11           |                     | 8.242e-02 | 8.337e-02  |               | 4.031e-01  |                | 1.161e+11 | A+   |
| $7d^2D_{5/2}$ | $6p^2P_{3/2}$ | 159.88          |                     | 6.904e-01 | 6.924e-01  |               | 1.312e+00  |                | 5.705e+10 | B+   |
| $7d^2D_{5/2}$ | $7p^2P_{3/2}$ | 2506.63         |                     | 1.703e+01 | 1.701e+01  |               | 2.063e+00  |                | 3.650e+08 | D+   |
| $7d^2D_{5/2}$ | $4f^2F_{5/2}$ | 32.11           |                     | 3.960e-05 | 4.470e-05  |               | 3.749e-04  |                | 4.042e+08 | C+   |
| $7d^2D_{5/2}$ | $5f^2F_{5/2}$ | 69.45           |                     | 6.417e-04 | 6.667e-04  |               | 2.807e-03  |                | 6.469e+08 | B+   |
| $7d^2D_{5/2}$ | $6f^2F_{5/2}$ | 188.93          |                     | 1.657e-02 | 1.666e-02  |               | 2.664e-02  |                | 8.297e+08 | B+   |

Table S2 – continued from previous page

| Upper level    | Lower level    | $\lambda$ [RCI] | $\lambda$ Ref. [48] | $S$ [RCI] | $S$ [MBPT] | $S$ Ref. [22] | $gf$ [RCI] | $gf$ Ref. [24] | $A$ [RCI] | Unc. |
|----------------|----------------|-----------------|---------------------|-----------|------------|---------------|------------|----------------|-----------|------|
| $7d^2D_{5/2}$  | $4f^2F_{7/2}$  | 32.15           |                     | 8.049e-04 | 9.043e-04  |               | 7.606e-03  | 8.182e+09      |           | C+   |
| $7d^2D_{5/2}$  | $5f^2F_{7/2}$  | 69.54           |                     | 1.302e-02 | 1.351e-02  |               | 5.689e-02  | 1.308e+10      |           | B+   |
| $7d^2D_{5/2}$  | $6f^2F_{7/2}$  | 189.30          |                     | 3.370e-01 | 3.384e-01  |               | 5.407e-01  | 1.678e+10      |           | B+   |
| $7f^2F_{5/2}$  | $3d^2D_{3/2}$  | 14.21           |                     | 5.244e-03 | 5.649e-03  |               | 1.121e-01  | 6.172e+11      |           | B    |
| $7f^2F_{5/2}$  | $4d^2D_{3/2}$  | 30.72           |                     | 2.954e-02 | 3.033e-02  |               | 2.921e-01  | 3.440e+11      |           | A    |
| $7f^2F_{5/2}$  | $5d^2D_{3/2}$  | 65.80           |                     | 1.572e-01 | 1.590e-01  |               | 7.256e-01  | 1.863e+11      |           | A+   |
| $7f^2F_{5/2}$  | $6d^2D_{3/2}$  | 171.41          |                     | 1.489e+00 | 1.496e+00  |               | 2.639e+00  | 9.987e+10      |           | B+   |
| $7f^2F_{5/2}$  | $3d^2D_{5/2}$  | 14.25           |                     | 3.742e-04 | 4.000e-04  |               | 7.976e-03  | 4.366e+10      |           | B    |
| $7f^2F_{5/2}$  | $4d^2D_{5/2}$  | 30.81           |                     | 2.113e-03 | 2.168e-03  |               | 2.083e-02  | 2.440e+10      |           | B+   |
| $7f^2F_{5/2}$  | $5d^2D_{5/2}$  | 66.02           |                     | 1.127e-02 | 1.146e-02  |               | 5.185e-02  | 1.323e+10      |           | A    |
| $7f^2F_{5/2}$  | $6d^2D_{5/2}$  | 172.55          |                     | 1.087e-01 | 1.094e-01  |               | 1.913e-01  | 7.145e+09      |           | B+   |
| $7f^2F_{5/2}$  | $5g^2G_{7/2}$  | 68.92           |                     | 2.301e-03 | 2.365e-03  |               | 1.014e-02  | 2.373e+09      |           | B+   |
| $7f^2F_{5/2}$  | $6g^2G_{7/2}$  | 183.93          |                     | 1.030e-01 | 1.033e-01  |               | 1.702e-01  | 5.592e+09      |           | B+   |
| $7f^2F_{7/2}$  | $3d^2D_{5/2}$  | 14.25           |                     | 7.531e-03 | 8.047e-03  |               | 1.605e-01  | 6.591e+11      |           | B+   |
| $7f^2F_{7/2}$  | $4d^2D_{5/2}$  | 30.80           |                     | 4.232e-02 | 4.340e-02  |               | 4.173e-01  | 3.667e+11      |           | A    |
| $7f^2F_{7/2}$  | $5d^2D_{5/2}$  | 65.99           |                     | 2.248e-01 | 2.286e-01  |               | 1.035e+00  | 1.981e+11      |           | A+   |
| $7f^2F_{7/2}$  | $6d^2D_{5/2}$  | 172.37          |                     | 2.155e+00 | 2.169e+00  |               | 3.797e+00  | 1.066e+11      |           | B+   |
| $7f^2F_{7/2}$  | $6g^2G_{7/2}$  | 183.73          |                     | 3.739e-03 | 3.751e-03  |               | 6.182e-03  | 1.527e+08      |           | B+   |
| $7f^2F_{7/2}$  | $5g^2G_{9/2}$  | 68.93           |                     | 2.953e-03 | 3.043e-03  |               | 1.301e-02  | 2.283e+09      |           | B+   |
| $7f^2F_{7/2}$  | $6g^2G_{9/2}$  | 183.91          |                     | 1.325e-01 | 1.330e-01  |               | 2.188e-01  | 5.394e+09      |           | B+   |
| $7g^2G_{7/2}$  | $4f^2F_{5/2}$  | 31.87           |                     | 3.675e-02 | 3.760e-02  |               | 3.503e-01  | 2.875e+11      |           | A    |
| $7g^2G_{7/2}$  | $5f^2F_{5/2}$  | 68.35           |                     | 3.083e-01 | 3.103e-01  |               | 1.370e+00  | 2.445e+11      |           | A+   |
| $7g^2G_{7/2}$  | $6f^2F_{5/2}$  | 181.00          |                     | 3.860e+00 | 3.873e+00  |               | 6.478e+00  | 1.649e+11      |           | B+   |
| $7g^2G_{7/2}$  | $4f^2F_{7/2}$  | 31.91           |                     | 1.354e-03 | 1.386e-03  |               | 1.289e-02  | 1.056e+10      |           | B+   |
| $7g^2G_{7/2}$  | $5f^2F_{7/2}$  | 68.44           |                     | 1.142e-02 | 1.149e-02  |               | 5.067e-02  | 9.021e+09      |           | A    |
| $7g^2G_{7/2}$  | $6f^2F_{7/2}$  | 181.34          |                     | 1.439e-01 | 1.444e-01  |               | 2.411e-01  | 6.112e+09      |           | B+   |
| $7g^2G_{7/2}$  | $6h^2H_{9/2}$  | 183.12          |                     | 3.770e-02 | 3.785e-02  |               | 6.254e-02  | 1.555e+09      |           | B+   |
| $7g^2G_{9/2}$  | $4f^2F_{7/2}$  | 31.90           |                     | 4.760e-02 | 4.871e-02  |               | 4.532e-01  | 2.970e+11      |           | A    |
| $7g^2G_{9/2}$  | $5f^2F_{7/2}$  | 68.41           |                     | 3.999e-01 | 4.026e-01  |               | 1.775e+00  | 2.530e+11      |           | A+   |
| $7g^2G_{9/2}$  | $6f^2F_{7/2}$  | 181.18          |                     | 5.021e+00 | 5.036e+00  |               | 8.418e+00  | 1.711e+11      |           | B+   |
| $7g^2G_{9/2}$  | $6h^2H_{11/2}$ | 183.10          |                     | 4.634e-02 | 4.626e-02  |               | 7.688e-02  | 1.530e+09      |           | B+   |
| $7h^2H_{11/2}$ | $5g^2G_{9/2}$  | 68.75           |                     | 4.468e-01 | 4.486e-01  |               | 1.974e+00  | 2.321e+11      |           | A+   |
| $7h^2H_{11/2}$ | $6g^2G_{9/2}$  | 182.62          |                     | 8.781e+00 | 8.792e+00  |               | 1.461e+01  | 2.434e+11      |           | B+   |
| $7h^2H_{9/2}$  | $5g^2G_{7/2}$  | 68.72           |                     | 3.631e-01 | 3.655e-01  |               | 1.605e+00  | 2.267e+11      |           | A+   |
| $7h^2H_{9/2}$  | $6g^2G_{7/2}$  | 182.54          |                     | 7.144e+00 | 7.155e+00  |               | 1.189e+01  | 2.380e+11      |           | B+   |
| $7h^2H_{9/2}$  | $5g^2G_{9/2}$  | 68.77           |                     | 8.244e-03 | 8.288e-03  |               | 3.641e-02  | 5.136e+09      |           | A    |
| $7h^2H_{9/2}$  | $6g^2G_{9/2}$  | 182.72          |                     | 1.628e-01 | 1.630e-01  |               | 2.706e-01  | 5.406e+09      |           | B+   |
| $7i^2I_{11/2}$ | $6h^2H_{9/2}$  | 182.78          |                     | 1.206e+01 | 1.207e+01  |               | 2.004e+01  | 3.334e+11      |           | B+   |
| $7i^2I_{11/2}$ | $6h^2H_{11/2}$ | 182.92          |                     | 1.857e-01 | 1.858e-01  |               | 3.084e-01  | 5.123e+09      |           | B+   |

Table S2 – continued from previous page

| Upper level     | Lower level     | $\lambda$ [RCI] | $\lambda$ Ref. [48] | $S$ [RCI] | $S$ [MBPT] | $S$ Ref. [22] | $gf$ [RCI] | $gf$ Ref. [24] | $A$ [RCI] | Unc. |
|-----------------|-----------------|-----------------|---------------------|-----------|------------|---------------|------------|----------------|-----------|------|
| $7i\ ^2I\ 13/2$ | $6h\ ^2H\ 11/2$ | 182.86          |                     | 1.429e+01 | 1.430e+01  |               | 2.375e+01  |                | 3.384e+11 | B+   |
| $7p\ ^2P\ 1/2$  | $3s\ ^2S\ 1/2$  | 12.29           |                     | 5.693e-04 | 5.827e-04  |               | 1.407e-02  |                | 3.104e+11 | B+   |
| $7p\ ^2P\ 1/2$  | $4s\ ^2S\ 1/2$  | 27.46           |                     | 2.629e-03 | 2.677e-03  |               | 2.909e-02  |                | 1.287e+11 | B+   |
| $7p\ ^2P\ 1/2$  | $5s\ ^2S\ 1/2$  | 59.63           |                     | 1.387e-02 | 1.390e-02  |               | 7.064e-02  |                | 6.626e+10 | A    |
| $7p\ ^2P\ 1/2$  | $6s\ ^2S\ 1/2$  | 155.48          |                     | 1.338e-01 | 1.326e-01  |               | 2.614e-01  |                | 3.606e+10 | A    |
| $7p\ ^2P\ 1/2$  | $7s\ ^2S\ 1/2$  | 3047.74         |                     | 4.670e+00 | 4.679e+00  |               | 4.655e-01  |                | 1.671e+08 | D    |
| $7p\ ^2P\ 1/2$  | $3d\ ^2D\ 3/2$  | 14.35           |                     | 1.621e-04 | 1.451e-04  |               | 3.433e-03  |                | 5.563e+10 | C+   |
| $7p\ ^2P\ 1/2$  | $4d\ ^2D\ 3/2$  | 31.36           |                     | 1.666e-03 | 1.667e-03  |               | 1.613e-02  |                | 5.470e+10 | B+   |
| $7p\ ^2P\ 1/2$  | $5d\ ^2D\ 3/2$  | 68.81           |                     | 1.609e-02 | 1.619e-02  |               | 7.102e-02  |                | 5.002e+10 | A    |
| $7p\ ^2P\ 1/2$  | $6d\ ^2D\ 3/2$  | 193.47          |                     | 3.420e-01 | 3.432e-01  |               | 5.369e-01  |                | 4.784e+10 | B+   |
| $7p\ ^2P\ 3/2$  | $3s\ ^2S\ 1/2$  | 12.28           |                     | 1.058e-03 | 1.088e-03  |               | 2.616e-02  |                | 2.890e+11 | B+   |
| $7p\ ^2P\ 3/2$  | $4s\ ^2S\ 1/2$  | 27.41           |                     | 4.800e-03 | 4.917e-03  |               | 5.320e-02  |                | 1.181e+11 | A    |
| $7p\ ^2P\ 3/2$  | $5s\ ^2S\ 1/2$  | 59.39           |                     | 2.491e-02 | 2.499e-02  |               | 1.274e-01  |                | 6.026e+10 | A    |
| $7p\ ^2P\ 3/2$  | $6s\ ^2S\ 1/2$  | 153.84          |                     | 2.305e-01 | 2.272e-01  |               | 4.552e-01  |                | 3.207e+10 | A    |
| $7p\ ^2P\ 3/2$  | $7s\ ^2S\ 1/2$  | 2521.24         |                     | 9.369e+00 | 9.386e+00  |               | 1.129e+00  |                | 2.961e+08 | D+   |
| $7p\ ^2P\ 3/2$  | $3d\ ^2D\ 3/2$  | 14.33           |                     | 2.980e-05 | 2.610e-05  |               | 6.312e-04  |                | 5.125e+09 | C    |
| $7p\ ^2P\ 3/2$  | $4d\ ^2D\ 3/2$  | 31.30           |                     | 2.997e-04 | 3.030e-04  |               | 2.909e-03  |                | 4.953e+09 | B    |
| $7p\ ^2P\ 3/2$  | $5d\ ^2D\ 3/2$  | 68.49           |                     | 2.903e-03 | 2.939e-03  |               | 1.288e-02  |                | 4.577e+09 | B+   |
| $7p\ ^2P\ 3/2$  | $6d\ ^2D\ 3/2$  | 190.94          |                     | 6.031e-02 | 6.053e-02  |               | 9.594e-02  |                | 4.388e+09 | B+   |
| $7p\ ^2P\ 3/2$  | $3d\ ^2D\ 5/2$  | 14.37           |                     | 2.666e-04 | 2.380e-04  |               | 5.635e-03  |                | 4.548e+10 | C+   |
| $7p\ ^2P\ 3/2$  | $4d\ ^2D\ 5/2$  | 31.38           |                     | 2.800e-03 | 2.785e-03  |               | 2.710e-02  |                | 4.588e+10 | B+   |
| $7p\ ^2P\ 3/2$  | $5d\ ^2D\ 5/2$  | 68.73           |                     | 2.684e-02 | 2.710e-02  |               | 1.186e-01  |                | 4.188e+10 | A    |
| $7p\ ^2P\ 3/2$  | $6d\ ^2D\ 5/2$  | 192.35          |                     | 5.609e-01 | 5.626e-01  |               | 8.857e-01  |                | 3.992e+10 | B+   |
| $7s\ ^2S\ 1/2$  | $3p\ ^2P\ 1/2$  | 13.08           |                     | 2.066e-04 | 2.067e-04  |               | 4.800e-03  |                | 9.361e+10 | B    |
| $7s\ ^2S\ 1/2$  | $4p\ ^2P\ 1/2$  | 29.21           |                     | 1.449e-03 | 1.474e-03  |               | 1.507e-02  |                | 5.889e+10 | B+   |
| $7s\ ^2S\ 1/2$  | $5p\ ^2P\ 1/2$  | 64.47           |                     | 1.122e-02 | 1.128e-02  |               | 5.287e-02  |                | 4.243e+10 | A    |
| $7s\ ^2S\ 1/2$  | $6p\ ^2P\ 1/2$  | 179.33          |                     | 1.911e-01 | 1.918e-01  |               | 3.237e-01  |                | 3.357e+10 | B+   |
| $7s\ ^2S\ 1/2$  | $3p\ ^2P\ 3/2$  | 13.26           |                     | 4.419e-04 | 4.548e-04  |               | 1.012e-02  |                | 1.920e+11 | B    |
| $7s\ ^2S\ 1/2$  | $4p\ ^2P\ 3/2$  | 29.57           |                     | 3.195e-03 | 3.228e-03  |               | 3.282e-02  |                | 1.252e+11 | B+   |
| $7s\ ^2S\ 1/2$  | $5p\ ^2P\ 3/2$  | 65.34           |                     | 2.481e-02 | 2.485e-02  |               | 1.153e-01  |                | 9.009e+10 | A    |
| $7s\ ^2S\ 1/2$  | $6p\ ^2P\ 3/2$  | 183.18          |                     | 4.342e-01 | 4.367e-01  |               | 7.199e-01  |                | 7.155e+10 | B+   |
| $8d\ ^2D\ 3/2$  | $3p\ ^2P\ 1/2$  | 12.36           |                     | 1.317e-03 | 1.389e-03  |               | 3.235e-02  |                | 3.529e+11 | C+   |
| $8d\ ^2D\ 3/2$  | $4p\ ^2P\ 1/2$  | 25.88           |                     | 4.721e-03 | 4.891e-03  |               | 5.542e-02  |                | 1.380e+11 | B    |
| $8d\ ^2D\ 3/2$  | $5p\ ^2P\ 1/2$  | 50.19           |                     | 1.676e-02 | 1.696e-02  |               | 1.015e-01  |                | 6.717e+10 | B    |
| $8d\ ^2D\ 3/2$  | $6p\ ^2P\ 1/2$  | 100.09          |                     | 7.171e-02 | 7.151e-02  |               | 2.176e-01  |                | 3.622e+10 | B+   |
| $8d\ ^2D\ 3/2$  | $7p\ ^2P\ 1/2$  | 244.72          |                     | 5.528e-01 | 5.452e-01  |               | 6.862e-01  |                | 1.911e+10 | B+   |
| $8d\ ^2D\ 3/2$  | $8p\ ^2P\ 1/2$  | 3319.82         |                     | 1.633e+01 | 1.639e+01  |               | 1.494e+00  |                | 2.261e+08 | E    |
| $8d\ ^2D\ 3/2$  | $3p\ ^2P\ 3/2$  | 12.53           |                     | 2.744e-04 | 2.849e-04  |               | 6.654e-03  |                | 7.073e+10 | C+   |
| $8d\ ^2D\ 3/2$  | $4p\ ^2P\ 3/2$  | 26.16           |                     | 9.936e-04 | 1.024e-03  |               | 1.154e-02  |                | 2.812e+10 | C+   |

Table S2 – continued from previous page

| Upper level   | Lower level   | $\lambda$ [RCI] | $\lambda$ Ref. [48] | $S$ [RCI] | $S$ [MBPT] | $S$ Ref. [22] | $gf$ [RCI] | $gf$ Ref. [24] | $A$ [RCI] | Unc. |
|---------------|---------------|-----------------|---------------------|-----------|------------|---------------|------------|----------------|-----------|------|
| $8d^2D_{3/2}$ | $5p^2P_{3/2}$ | 50.71           |                     | 3.560e-03 | 3.627e-03  |               | 2.132e-02  |                | 1.382e+10 | C+   |
| $8d^2D_{3/2}$ | $6p^2P_{3/2}$ | 101.28          |                     | 1.559e-02 | 1.571e-02  |               | 4.676e-02  |                | 7.601e+09 | B    |
| $8d^2D_{3/2}$ | $7p^2P_{3/2}$ | 248.89          |                     | 1.254e-01 | 1.264e-01  |               | 1.530e-01  |                | 4.118e+09 | B+   |
| $8d^2D_{3/2}$ | $4f^2F_{5/2}$ | 28.77           |                     | 2.607e-04 | 3.169e-04  |               | 2.753e-03  |                | 5.546e+09 | C    |
| $8d^2D_{3/2}$ | $5f^2F_{5/2}$ | 55.50           |                     | 2.741e-03 | 2.987e-03  |               | 1.500e-02  |                | 8.121e+09 | C+   |
| $8d^2D_{3/2}$ | $6f^2F_{5/2}$ | 112.21          |                     | 2.684e-02 | 2.774e-02  |               | 7.266e-02  |                | 9.624e+09 | B+   |
| $8d^2D_{3/2}$ | $7f^2F_{5/2}$ | 292.31          |                     | 5.392e-01 | 5.468e-01  |               | 5.603e-01  |                | 1.094e+10 | B+   |
| $8d^2D_{5/2}$ | $3p^2P_{3/2}$ | 12.52           |                     | 2.481e-03 | 2.554e-03  |               | 6.018e-02  |                | 4.265e+11 | C+   |
| $8d^2D_{5/2}$ | $4p^2P_{3/2}$ | 26.15           |                     | 8.790e-03 | 9.131e-03  |               | 1.021e-01  |                | 1.660e+11 | B    |
| $8d^2D_{5/2}$ | $5p^2P_{3/2}$ | 50.69           |                     | 3.127e-02 | 3.217e-02  |               | 1.874e-01  |                | 8.109e+10 | B+   |
| $8d^2D_{5/2}$ | $6p^2P_{3/2}$ | 101.18          |                     | 1.359e-01 | 1.385e-01  |               | 4.079e-01  |                | 4.429e+10 | B+   |
| $8d^2D_{5/2}$ | $7p^2P_{3/2}$ | 248.28          |                     | 1.093e+00 | 1.101e+00  |               | 1.337e+00  |                | 2.411e+10 | B+   |
| $8d^2D_{5/2}$ | $8p^2P_{3/2}$ | 3814.94         |                     | 2.968e+01 | 2.967e+01  |               | 2.363e+00  |                | 1.805e+08 | E    |
| $8d^2D_{5/2}$ | $4f^2F_{5/2}$ | 28.76           |                     | 1.870e-05 | 2.190e-05  |               | 1.975e-04  |                | 2.654e+08 | C    |
| $8d^2D_{5/2}$ | $5f^2F_{5/2}$ | 55.47           |                     | 1.882e-04 | 2.069e-04  |               | 1.031e-03  |                | 3.723e+08 | C+   |
| $8d^2D_{5/2}$ | $6f^2F_{5/2}$ | 112.09          |                     | 1.832e-03 | 1.920e-03  |               | 4.964e-03  |                | 4.393e+08 | C+   |
| $8d^2D_{5/2}$ | $7f^2F_{5/2}$ | 291.47          |                     | 3.729e-02 | 3.764e-02  |               | 3.886e-02  |                | 5.085e+08 | B    |
| $8d^2D_{5/2}$ | $4f^2F_{7/2}$ | 28.79           |                     | 3.718e-04 | 4.414e-04  |               | 3.923e-03  |                | 5.262e+09 | C    |
| $8d^2D_{5/2}$ | $5f^2F_{7/2}$ | 55.53           |                     | 3.813e-03 | 4.178e-03  |               | 2.086e-02  |                | 7.520e+09 | B    |
| $8d^2D_{5/2}$ | $6f^2F_{7/2}$ | 112.22          |                     | 3.730e-02 | 3.886e-02  |               | 1.010e-01  |                | 8.914e+09 | B+   |
| $8d^2D_{5/2}$ | $7f^2F_{7/2}$ | 291.99          |                     | 7.537e-01 | 7.644e-01  |               | 7.841e-01  |                | 1.022e+10 | B+   |
| $8f^2F_{5/2}$ | $3d^2D_{3/2}$ | 13.53           |                     | 2.848e-03 | 3.100e-03  |               | 6.397e-02  |                | 3.887e+11 | C+   |
| $8f^2F_{5/2}$ | $4d^2D_{3/2}$ | 27.69           |                     | 1.380e-02 | 1.436e-02  |               | 1.514e-01  |                | 2.195e+11 | B    |
| $8f^2F_{5/2}$ | $5d^2D_{3/2}$ | 53.30           |                     | 5.484e-02 | 5.603e-02  |               | 3.125e-01  |                | 1.223e+11 | B+   |
| $8f^2F_{5/2}$ | $6d^2D_{3/2}$ | 106.41          |                     | 2.551e-01 | 2.580e-01  |               | 7.281e-01  |                | 7.149e+10 | B+   |
| $8f^2F_{5/2}$ | $7d^2D_{3/2}$ | 265.03          |                     | 2.292e+00 | 2.279e+00  |               | 2.627e+00  |                | 4.158e+10 | B+   |
| $8f^2F_{5/2}$ | $3d^2D_{5/2}$ | 13.56           |                     | 1.972e-04 | 2.190e-04  |               | 4.417e-03  |                | 2.670e+10 | C+   |
| $8f^2F_{5/2}$ | $4d^2D_{5/2}$ | 27.76           |                     | 9.885e-04 | 1.023e-03  |               | 1.082e-02  |                | 1.560e+10 | C+   |
| $8f^2F_{5/2}$ | $5d^2D_{5/2}$ | 53.45           |                     | 3.942e-03 | 4.020e-03  |               | 2.241e-02  |                | 8.720e+09 | B    |
| $8f^2F_{5/2}$ | $6d^2D_{5/2}$ | 106.85          |                     | 1.850e-02 | 1.865e-02  |               | 5.259e-02  |                | 5.121e+09 | B    |
| $8f^2F_{5/2}$ | $7d^2D_{5/2}$ | 265.84          |                     | 1.659e-01 | 1.669e-01  |               | 1.896e-01  |                | 2.982e+09 | B+   |
| $8f^2F_{5/2}$ | $5g^2G_{7/2}$ | 55.33           |                     | 5.818e-04 | 6.687e-04  |               | 3.194e-03  |                | 1.160e+09 | C+   |
| $8f^2F_{5/2}$ | $6g^2G_{7/2}$ | 111.10          |                     | 1.060e-02 | 1.108e-02  |               | 2.899e-02  |                | 2.611e+09 | B    |
| $8f^2F_{5/2}$ | $7g^2G_{7/2}$ | 283.30          |                     | 2.856e-01 | 2.877e-01  |               | 3.062e-01  |                | 4.242e+09 | B+   |
| $8f^2F_{7/2}$ | $3d^2D_{5/2}$ | 13.56           |                     | 3.990e-03 | 4.407e-03  |               | 8.936e-02  |                | 4.051e+11 | C+   |
| $8f^2F_{7/2}$ | $4d^2D_{5/2}$ | 27.76           |                     | 1.975e-02 | 2.051e-02  |               | 2.161e-01  |                | 2.339e+11 | B+   |
| $8f^2F_{7/2}$ | $5d^2D_{5/2}$ | 53.44           |                     | 7.835e-02 | 8.031e-02  |               | 4.454e-01  |                | 1.301e+11 | B+   |
| $8f^2F_{7/2}$ | $6d^2D_{5/2}$ | 106.81          |                     | 3.662e-01 | 3.714e-01  |               | 1.041e+00  |                | 7.610e+10 | B+   |
| $8f^2F_{7/2}$ | $7d^2D_{5/2}$ | 265.64          |                     | 3.286e+00 | 3.307e+00  |               | 3.758e+00  |                | 4.440e+10 | B+   |

Table S2 – continued from previous page

| Upper level    | Lower level    | $\lambda$ [RCI] | $\lambda$ Ref. [48] | $S$ [RCI] | $S$ [MBPT] | $S$ Ref. [22] | $gf$ [RCI] | $gf$ Ref. [24] | $A$ [RCI] | Unc. |
|----------------|----------------|-----------------|---------------------|-----------|------------|---------------|------------|----------------|-----------|------|
| $8f^2F_{7/2}$  | $7g^2G_{7/2}$  | 283.07          |                     | 1.040e-02 | 1.046e-02  |               | 1.116e-02  |                | 1.161e+08 | B    |
| $8f^2F_{7/2}$  | $5g^2G_{9/2}$  | 55.35           |                     | 7.832e-04 | 8.599e-04  |               | 4.298e-03  |                | 1.170e+09 | C+   |
| $8f^2F_{7/2}$  | $6g^2G_{9/2}$  | 111.14          |                     | 1.381e-02 | 1.426e-02  |               | 3.775e-02  |                | 2.548e+09 | B    |
| $8f^2F_{7/2}$  | $7g^2G_{9/2}$  | 283.46          |                     | 3.697e-01 | 3.703e-01  |               | 3.961e-01  |                | 4.110e+09 | B+   |
| $8g^2G_{7/2}$  | $4f^2F_{5/2}$  | 28.63           |                     | 1.510e-02 | 1.556e-02  |               | 1.602e-01  |                | 1.630e+11 | B    |
| $8g^2G_{7/2}$  | $5f^2F_{5/2}$  | 55.00           |                     | 9.224e-02 | 9.353e-02  |               | 5.095e-01  |                | 1.404e+11 | B+   |
| $8g^2G_{7/2}$  | $6f^2F_{5/2}$  | 110.16          |                     | 5.296e-01 | 5.339e-01  |               | 1.460e+00  |                | 1.003e+11 | B+   |
| $8g^2G_{7/2}$  | $7f^2F_{5/2}$  | 278.81          |                     | 5.729e+00 | 5.750e+00  |               | 6.241e+00  |                | 6.695e+10 | B+   |
| $8g^2G_{7/2}$  | $4f^2F_{7/2}$  | 28.66           |                     | 5.546e-04 | 5.724e-04  |               | 5.879e-03  |                | 5.967e+09 | C+   |
| $8g^2G_{7/2}$  | $5f^2F_{7/2}$  | 55.05           |                     | 3.408e-03 | 3.456e-03  |               | 1.881e-02  |                | 5.174e+09 | C+   |
| $8g^2G_{7/2}$  | $6f^2F_{7/2}$  | 110.29          |                     | 1.966e-02 | 1.980e-02  |               | 5.414e-02  |                | 3.711e+09 | B    |
| $8g^2G_{7/2}$  | $7f^2F_{7/2}$  | 279.28          |                     | 2.135e-01 | 2.145e-01  |               | 2.322e-01  |                | 2.483e+09 | B+   |
| $8g^2G_{7/2}$  | $6h^2H_{9/2}$  | 110.94          |                     | 3.110e-03 | 3.310e-03  |               | 8.515e-03  |                | 5.768e+08 | C+   |
| $8g^2G_{7/2}$  | $7h^2H_{9/2}$  | 282.08          |                     | 1.569e-01 | 1.590e-01  |               | 1.690e-01  |                | 1.771e+09 | B+   |
| $8g^2G_{9/2}$  | $4f^2F_{7/2}$  | 28.66           |                     | 1.956e-02 | 2.014e-02  |               | 2.073e-01  |                | 1.684e+11 | B+   |
| $8g^2G_{9/2}$  | $5f^2F_{7/2}$  | 55.04           |                     | 1.197e-01 | 1.212e-01  |               | 6.604e-01  |                | 1.454e+11 | B+   |
| $8g^2G_{9/2}$  | $6f^2F_{7/2}$  | 110.25          |                     | 6.884e-01 | 6.929e-01  |               | 1.897e+00  |                | 1.041e+11 | B+   |
| $8g^2G_{9/2}$  | $7f^2F_{7/2}$  | 279.07          |                     | 7.441e+00 | 7.479e+00  |               | 8.099e+00  |                | 6.937e+10 | B+   |
| $8g^2G_{9/2}$  | $6h^2H_{11/2}$ | 110.96          |                     | 4.024e-03 | 4.046e-03  |               | 1.102e-02  |                | 5.968e+08 | B    |
| $8g^2G_{9/2}$  | $7h^2H_{11/2}$ | 282.11          |                     | 1.944e-01 | 1.944e-01  |               | 2.094e-01  |                | 1.755e+09 | B+   |
| $8h^2H_{11/2}$ | $5g^2G_{9/2}$  | 55.27           |                     | 1.064e-01 | 1.072e-01  |               | 5.851e-01  |                | 1.065e+11 | B+   |
| $8h^2H_{11/2}$ | $6g^2G_{9/2}$  | 110.80          |                     | 9.503e-01 | 9.526e-01  |               | 2.605e+00  |                | 1.180e+11 | A    |
| $8h^2H_{11/2}$ | $7g^2G_{9/2}$  | 281.28          |                     | 1.261e+01 | 1.263e+01  |               | 1.362e+01  |                | 9.570e+10 | B+   |
| $8h^2H_{11/2}$ | $7i^2I_{13/2}$ | 281.85          |                     | 7.187e-02 | 7.173e-02  |               | 7.746e-02  |                | 5.420e+08 | B+   |
| $8h^2H_{9/2}$  | $5g^2G_{7/2}$  | 55.25           |                     | 8.597e-02 | 8.741e-02  |               | 4.727e-01  |                | 1.033e+11 | B+   |
| $8h^2H_{9/2}$  | $6g^2G_{7/2}$  | 110.77          |                     | 7.700e-01 | 7.760e-01  |               | 2.111e+00  |                | 1.148e+11 | B+   |
| $8h^2H_{9/2}$  | $7g^2G_{7/2}$  | 281.13          |                     | 1.025e+01 | 1.027e+01  |               | 1.108e+01  |                | 9.347e+10 | B+   |
| $8h^2H_{9/2}$  | $5g^2G_{9/2}$  | 55.28           |                     | 1.950e-03 | 1.979e-03  |               | 1.072e-02  |                | 2.339e+09 | C+   |
| $8h^2H_{9/2}$  | $6g^2G_{9/2}$  | 110.84          |                     | 1.750e-02 | 1.762e-02  |               | 4.796e-02  |                | 2.604e+09 | B    |
| $8h^2H_{9/2}$  | $7g^2G_{9/2}$  | 281.52          |                     | 2.339e-01 | 2.343e-01  |               | 2.523e-01  |                | 2.124e+09 | B+   |
| $8h^2H_{9/2}$  | $7i^2I_{11/2}$ | 281.94          |                     | 6.101e-02 | 6.070e-02  |               | 6.573e-02  |                | 5.515e+08 | B    |
| $8i^2I_{11/2}$ | $6h^2H_{9/2}$  | 110.86          |                     | 7.896e-01 | 7.915e-01  |               | 2.164e+00  |                | 9.785e+10 | B+   |
| $8i^2I_{11/2}$ | $7h^2H_{9/2}$  | 281.56          |                     | 1.669e+01 | 1.671e+01  |               | 1.801e+01  |                | 1.263e+11 | B+   |
| $8i^2I_{11/2}$ | $6h^2H_{11/2}$ | 110.91          |                     | 1.213e-02 | 1.215e-02  |               | 3.323e-02  |                | 1.502e+09 | B    |
| $8i^2I_{11/2}$ | $7h^2H_{11/2}$ | 281.81          |                     | 2.574e-01 | 2.575e-01  |               | 2.774e-01  |                | 1.942e+09 | B+   |
| $8i^2I_{13/2}$ | $6h^2H_{11/2}$ | 110.90          |                     | 9.365e-01 | 9.376e-01  |               | 2.565e+00  |                | 9.937e+10 | A    |
| $8i^2I_{13/2}$ | $7h^2H_{11/2}$ | 281.73          |                     | 1.980e+01 | 1.981e+01  |               | 2.135e+01  |                | 1.282e+11 | B+   |
| $8p^2P_{1/2}$  | $3s^2S_{1/2}$  | 11.75           |                     | 3.266e-04 | 3.486e-04  |               | 8.444e-03  |                | 2.041e+11 | C+   |
| $8p^2P_{1/2}$  | $4s^2S_{1/2}$  | 24.87           |                     | 1.311e-03 | 1.376e-03  |               | 1.600e-02  |                | 8.628e+10 | C+   |

Table S2 – continued from previous page

| Upper level    | Lower level    | $\lambda$ [RCI] | $\lambda$ Ref. [48] | $S$ [RCI] | $S$ [MBPT] | $S$ Ref. [22] | $gf$ [RCI] | $gf$ Ref. [24] | $A$ [RCI] | Unc. |
|----------------|----------------|-----------------|---------------------|-----------|------------|---------------|------------|----------------|-----------|------|
| $8p\ ^2P\ 1/2$ | $5s\ ^2S\ 1/2$ | 48.65           |                     | 5.324e-03 | 5.309e-03  |               | 3.324e-02  |                | 4.684e+10 | B    |
| $8p\ ^2P\ 1/2$ | $6s\ ^2S\ 1/2$ | 97.88           |                     | 2.609e-02 | 2.505e-02  |               | 8.096e-02  |                | 2.818e+10 | B+   |
| $8p\ ^2P\ 1/2$ | $7s\ ^2S\ 1/2$ | 243.12          |                     | 2.343e-01 | 2.256e-01  |               | 2.927e-01  |                | 1.652e+10 | B+   |
| $8p\ ^2P\ 1/2$ | $8s\ ^2S\ 1/2$ | 4610.93         |                     | 8.055e+00 | 8.113e+00  |               | 5.307e-01  |                | 8.325e+07 | E    |
| $8p\ ^2P\ 1/2$ | $3d\ ^2D\ 3/2$ | 13.61           |                     | 9.180e-05 | 7.910e-05  |               | 2.050e-03  |                | 3.692e+10 | C    |
| $8p\ ^2P\ 1/2$ | $4d\ ^2D\ 3/2$ | 28.04           |                     | 7.450e-04 | 7.628e-04  |               | 8.072e-03  |                | 3.425e+10 | C+   |
| $8p\ ^2P\ 1/2$ | $5d\ ^2D\ 3/2$ | 54.59           |                     | 4.880e-03 | 4.966e-03  |               | 2.715e-02  |                | 3.039e+10 | B    |
| $8p\ ^2P\ 1/2$ | $6d\ ^2D\ 3/2$ | 111.68          |                     | 3.755e-02 | 3.778e-02  |               | 1.021e-01  |                | 2.731e+10 | B+   |
| $8p\ ^2P\ 1/2$ | $7d\ ^2D\ 3/2$ | 300.36          |                     | 7.016e-01 | 6.930e-01  |               | 7.095e-01  |                | 2.623e+10 | B+   |
| $8p\ ^2P\ 3/2$ | $3s\ ^2S\ 1/2$ | 11.74           |                     | 6.055e-04 | 6.535e-04  |               | 1.567e-02  |                | 1.895e+11 | C+   |
| $8p\ ^2P\ 3/2$ | $4s\ ^2S\ 1/2$ | 24.84           |                     | 2.395e-03 | 2.548e-03  |               | 2.928e-02  |                | 7.912e+10 | C+   |
| $8p\ ^2P\ 3/2$ | $5s\ ^2S\ 1/2$ | 48.53           |                     | 9.642e-03 | 9.690e-03  |               | 6.034e-02  |                | 4.272e+10 | B    |
| $8p\ ^2P\ 3/2$ | $6s\ ^2S\ 1/2$ | 97.41           |                     | 4.657e-02 | 4.478e-02  |               | 1.452e-01  |                | 2.552e+10 | B+   |
| $8p\ ^2P\ 3/2$ | $7s\ ^2S\ 1/2$ | 240.26          |                     | 4.023e-01 | 3.848e-01  |               | 5.087e-01  |                | 1.469e+10 | B+   |
| $8p\ ^2P\ 3/2$ | $8s\ ^2S\ 1/2$ | 3762.84         |                     | 1.616e+01 | 1.626e+01  |               | 1.305e+00  |                | 1.537e+08 | E    |
| $8p\ ^2P\ 3/2$ | $3d\ ^2D\ 3/2$ | 13.60           |                     | 1.650e-05 | 1.420e-05  |               | 3.693e-04  |                | 3.331e+09 | C    |
| $8p\ ^2P\ 3/2$ | $4d\ ^2D\ 3/2$ | 28.00           |                     | 1.340e-04 | 1.393e-04  |               | 1.454e-03  |                | 3.093e+09 | C+   |
| $8p\ ^2P\ 3/2$ | $5d\ ^2D\ 3/2$ | 54.45           |                     | 8.830e-04 | 9.094e-04  |               | 4.926e-03  |                | 2.771e+09 | C+   |
| $8p\ ^2P\ 3/2$ | $6d\ ^2D\ 3/2$ | 111.08          |                     | 6.794e-03 | 6.887e-03  |               | 1.858e-02  |                | 2.511e+09 | B    |
| $8p\ ^2P\ 3/2$ | $7d\ ^2D\ 3/2$ | 296.02          |                     | 1.245e-01 | 1.226e-01  |               | 1.277e-01  |                | 2.431e+09 | B+   |
| $8p\ ^2P\ 3/2$ | $3d\ ^2D\ 5/2$ | 13.64           |                     | 1.222e-04 | 1.281e-04  |               | 2.723e-03  |                | 2.442e+10 | C+   |
| $8p\ ^2P\ 3/2$ | $4d\ ^2D\ 5/2$ | 28.07           |                     | 1.279e-03 | 1.272e-03  |               | 1.384e-02  |                | 2.929e+10 | C+   |
| $8p\ ^2P\ 3/2$ | $5d\ ^2D\ 5/2$ | 54.60           |                     | 8.419e-03 | 8.344e-03  |               | 4.684e-02  |                | 2.620e+10 | B    |
| $8p\ ^2P\ 3/2$ | $6d\ ^2D\ 5/2$ | 111.55          |                     | 6.394e-02 | 6.341e-02  |               | 1.741e-01  |                | 2.333e+10 | B+   |
| $8p\ ^2P\ 3/2$ | $7d\ ^2D\ 5/2$ | 297.04          |                     | 1.132e+00 | 1.138e+00  |               | 1.158e+00  |                | 2.188e+10 | B+   |
| $8s\ ^2S\ 1/2$ | $3p\ ^2P\ 1/2$ | 12.44           |                     | 1.208e-04 | 1.233e-04  |               | 2.948e-03  |                | 6.350e+10 | C+   |
| $8s\ ^2S\ 1/2$ | $4p\ ^2P\ 1/2$ | 26.23           |                     | 6.885e-04 | 7.157e-04  |               | 7.974e-03  |                | 3.866e+10 | C+   |
| $8s\ ^2S\ 1/2$ | $5p\ ^2P\ 1/2$ | 51.53           |                     | 3.697e-03 | 3.727e-03  |               | 2.179e-02  |                | 2.738e+10 | B    |
| $8s\ ^2S\ 1/2$ | $6p\ ^2P\ 1/2$ | 105.57          |                     | 2.428e-02 | 2.411e-02  |               | 6.987e-02  |                | 2.091e+10 | B+   |
| $8s\ ^2S\ 1/2$ | $7p\ ^2P\ 1/2$ | 280.25          |                     | 3.731e-01 | 3.692e-01  |               | 4.044e-01  |                | 1.717e+10 | B+   |
| $8s\ ^2S\ 1/2$ | $3p\ ^2P\ 3/2$ | 12.61           |                     | 2.683e-04 | 2.677e-04  |               | 6.463e-03  |                | 1.356e+11 | C+   |
| $8s\ ^2S\ 1/2$ | $4p\ ^2P\ 3/2$ | 26.52           |                     | 1.510e-03 | 1.549e-03  |               | 1.730e-02  |                | 8.206e+10 | C+   |
| $8s\ ^2S\ 1/2$ | $5p\ ^2P\ 3/2$ | 52.08           |                     | 8.005e-03 | 8.088e-03  |               | 4.669e-02  |                | 5.740e+10 | B    |
| $8s\ ^2S\ 1/2$ | $6p\ ^2P\ 3/2$ | 106.89          |                     | 5.277e-02 | 5.281e-02  |               | 1.500e-01  |                | 4.378e+10 | B+   |
| $8s\ ^2S\ 1/2$ | $7p\ ^2P\ 3/2$ | 285.73          |                     | 8.339e-01 | 8.377e-01  |               | 8.865e-01  |                | 3.621e+10 | B+   |
| $9d\ ^2D\ 3/2$ | $3p\ ^2P\ 1/2$ | 12.00           |                     | 8.702e-04 | 9.394e-04  |               | 2.204e-02  |                | 2.554e+11 | C+   |
| $9d\ ^2D\ 3/2$ | $4p\ ^2P\ 1/2$ | 24.31           |                     | 2.786e-03 | 3.071e-03  |               | 3.481e-02  |                | 9.820e+10 | C+   |
| $9d\ ^2D\ 3/2$ | $5p\ ^2P\ 1/2$ | 44.62           |                     | 8.872e-03 | 9.073e-03  |               | 6.039e-02  |                | 5.058e+10 | B    |
| $9d\ ^2D\ 3/2$ | $6p\ ^2P\ 1/2$ | 80.16           |                     | 2.896e-02 | 2.855e-02  |               | 1.097e-01  |                | 2.848e+10 | B+   |

Table S2 – continued from previous page

| Upper level   | Lower level   | $\lambda$ [RCI] | $\lambda$ Ref. [48] | $S$ [RCI] | $S$ [MBPT] | $S$ Ref. [22] | $gf$ [RCI] | $gf$ Ref. [24] | $A$ [RCI] | Unc. |
|---------------|---------------|-----------------|---------------------|-----------|------------|---------------|------------|----------------|-----------|------|
| $9d^2D_{3/2}$ | $7p^2P_{1/2}$ | 152.19          |                     | 1.252e-01 | 1.134e-01  |               | 2.500e-01  |                | 1.800e+10 | C+   |
| $9d^2D_{3/2}$ | $8p^2P_{1/2}$ | 359.01          |                     | 8.589e-01 | 8.325e-01  |               | 7.267e-01  |                | 9.403e+09 | B    |
| $9d^2D_{3/2}$ | $9p^2P_{1/2}$ | 4755.76         |                     | 2.664e+01 | 2.652e+01  |               | 1.701e+00  |                | 1.254e+08 | E    |
| $9d^2D_{3/2}$ | $3p^2P_{3/2}$ | 12.15           |                     | 1.958e-04 | 1.904e-04  |               | 4.897e-03  |                | 5.533e+10 | C+   |
| $9d^2D_{3/2}$ | $4p^2P_{3/2}$ | 24.56           |                     | 5.838e-04 | 6.335e-04  |               | 7.219e-03  |                | 1.996e+10 | C+   |
| $9d^2D_{3/2}$ | $5p^2P_{3/2}$ | 45.04           |                     | 1.770e-03 | 1.907e-03  |               | 1.194e-02  |                | 9.815e+09 | C+   |
| $9d^2D_{3/2}$ | $6p^2P_{3/2}$ | 80.92           |                     | 5.860e-03 | 6.120e-03  |               | 2.200e-02  |                | 5.602e+09 | B    |
| $9d^2D_{3/2}$ | $7p^2P_{3/2}$ | 153.80          |                     | 2.424e-02 | 2.498e-02  |               | 4.787e-02  |                | 3.375e+09 | B    |
| $9d^2D_{3/2}$ | $8p^2P_{3/2}$ | 365.42          |                     | 2.008e-01 | 1.935e-01  |               | 1.669e-01  |                | 2.085e+09 | B    |
| $9d^2D_{3/2}$ | $4f^2F_{5/2}$ | 26.85           |                     | 1.818e-04 | 2.246e-04  |               | 2.057e-03  |                | 4.759e+09 | C    |
| $9d^2D_{3/2}$ | $5f^2F_{5/2}$ | 48.78           |                     | 1.224e-03 | 1.517e-03  |               | 7.622e-03  |                | 5.342e+09 | C    |
| $9d^2D_{3/2}$ | $6f^2F_{5/2}$ | 87.75           |                     | 7.795e-03 | 8.868e-03  |               | 2.698e-02  |                | 5.844e+09 | C+   |
| $9d^2D_{3/2}$ | $7f^2F_{5/2}$ | 169.34          |                     | 6.055e-02 | 6.433e-02  |               | 1.086e-01  |                | 6.317e+09 | B+   |
| $9d^2D_{3/2}$ | $8f^2F_{5/2}$ | 427.07          |                     | 1.089e+00 | 1.079e+00  |               | 7.748e-01  |                | 7.084e+09 | B    |
| $9d^2D_{5/2}$ | $3p^2P_{3/2}$ | 12.14           |                     | 1.948e-03 | 1.708e-03  |               | 4.872e-02  |                | 3.673e+11 | C+   |
| $9d^2D_{5/2}$ | $4p^2P_{3/2}$ | 24.54           |                     | 5.323e-03 | 5.654e-03  |               | 6.589e-02  |                | 1.216e+11 | B    |
| $9d^2D_{5/2}$ | $5p^2P_{3/2}$ | 44.97           |                     | 1.578e-02 | 1.695e-02  |               | 1.066e-01  |                | 5.859e+10 | B    |
| $9d^2D_{5/2}$ | $6p^2P_{3/2}$ | 80.69           |                     | 4.984e-02 | 5.415e-02  |               | 1.876e-01  |                | 3.203e+10 | B    |
| $9d^2D_{5/2}$ | $7p^2P_{3/2}$ | 152.96          |                     | 2.110e-01 | 2.198e-01  |               | 4.191e-01  |                | 1.991e+10 | B+   |
| $9d^2D_{5/2}$ | $8p^2P_{3/2}$ | 360.73          |                     | 1.704e+00 | 1.682e+00  |               | 1.435e+00  |                | 1.226e+10 | B+   |
| $9d^2D_{5/2}$ | $9p^2P_{3/2}$ | 4794.37         |                     | 4.758e+01 | 4.803e+01  |               | 3.015e+00  |                | 1.458e+08 | E    |
| $9d^2D_{5/2}$ | $4f^2F_{5/2}$ | 26.82           |                     | 1.680e-05 | 1.560e-05  |               | 1.899e-04  |                | 2.935e+08 | C    |
| $9d^2D_{5/2}$ | $5f^2F_{5/2}$ | 48.69           |                     | 8.540e-05 | 1.035e-04  |               | 5.329e-04  |                | 2.498e+08 | C    |
| $9d^2D_{5/2}$ | $6f^2F_{5/2}$ | 87.48           |                     | 4.922e-04 | 6.158e-04  |               | 1.709e-03  |                | 2.483e+08 | D+   |
| $9d^2D_{5/2}$ | $7f^2F_{5/2}$ | 168.33          |                     | 4.186e-03 | 4.461e-03  |               | 7.554e-03  |                | 2.964e+08 | C+   |
| $9d^2D_{5/2}$ | $8f^2F_{5/2}$ | 420.68          |                     | 7.282e-02 | 7.437e-02  |               | 5.258e-02  |                | 3.303e+08 | B    |
| $9d^2D_{5/2}$ | $4f^2F_{7/2}$ | 26.85           |                     | 3.458e-04 | 3.118e-04  |               | 3.912e-03  |                | 6.033e+09 | C+   |
| $9d^2D_{5/2}$ | $5f^2F_{7/2}$ | 48.73           |                     | 1.743e-03 | 2.116e-03  |               | 1.086e-02  |                | 5.085e+09 | C    |
| $9d^2D_{5/2}$ | $6f^2F_{7/2}$ | 87.56           |                     | 1.031e-02 | 1.241e-02  |               | 3.575e-02  |                | 5.185e+09 | C    |
| $9d^2D_{5/2}$ | $7f^2F_{7/2}$ | 168.50          |                     | 8.092e-02 | 9.013e-02  |               | 1.459e-01  |                | 5.712e+09 | C+   |
| $9d^2D_{5/2}$ | $8f^2F_{7/2}$ | 421.18          |                     | 1.412e+00 | 1.509e+00  |               | 1.019e+00  |                | 6.383e+09 | C+   |
| $9f^2F_{5/2}$ | $3d^2D_{3/2}$ | 13.09           |                     | 1.773e-03 | 1.921e-03  |               | 4.114e-02  |                | 2.668e+11 | C+   |
| $9f^2F_{5/2}$ | $4d^2D_{3/2}$ | 25.94           |                     | 7.546e-03 | 8.209e-03  |               | 8.837e-02  |                | 1.460e+11 | B    |
| $9f^2F_{5/2}$ | $5d^2D_{3/2}$ | 47.16           |                     | 2.596e-02 | 2.729e-02  |               | 1.672e-01  |                | 8.358e+10 | B+   |
| $9f^2F_{5/2}$ | $6d^2D_{3/2}$ | 84.46           |                     | 8.997e-02 | 9.261e-02  |               | 3.236e-01  |                | 5.042e+10 | B+   |
| $9f^2F_{5/2}$ | $7d^2D_{3/2}$ | 160.90          |                     | 4.172e-01 | 3.963e-01  |               | 7.877e-01  |                | 3.382e+10 | B+   |
| $9f^2F_{5/2}$ | $8d^2D_{3/2}$ | 386.94          |                     | 3.400e+00 | 3.357e+00  |               | 2.669e+00  |                | 1.981e+10 | B    |
| $9f^2F_{5/2}$ | $3d^2D_{5/2}$ | 13.13           |                     | 1.024e-04 | 1.351e-04  |               | 2.370e-03  |                | 1.529e+10 | D+   |
| $9f^2F_{5/2}$ | $4d^2D_{5/2}$ | 26.00           |                     | 5.669e-04 | 5.824e-04  |               | 6.623e-03  |                | 1.089e+10 | C+   |

Table S2 – continued from previous page

| Upper level     | Lower level      | $\lambda$ [RCI] | $\lambda$ Ref. [48] | $S$ [RCI] | $S$ [MBPT] | $S$ Ref. [22] | $gf$ [RCI] | $gf$ Ref. [24] | $A$ [RCI] | Unc. |
|-----------------|------------------|-----------------|---------------------|-----------|------------|---------------|------------|----------------|-----------|------|
| $9f\ ^2F_{5/2}$ | $5d\ ^2D_{5/2}$  | 47.28           |                     | 1.996e-03 | 1.950e-03  |               | 1.283e-02  |                | 6.380e+09 | C+   |
| $9f\ ^2F_{5/2}$ | $6d\ ^2D_{5/2}$  | 84.74           |                     | 6.992e-03 | 6.656e-03  |               | 2.507e-02  |                | 3.881e+09 | B    |
| $9f\ ^2F_{5/2}$ | $7d\ ^2D_{5/2}$  | 161.21          |                     | 2.787e-02 | 2.869e-02  |               | 5.252e-02  |                | 2.247e+09 | B+   |
| $9f\ ^2F_{5/2}$ | $8d\ ^2D_{5/2}$  | 388.41          |                     | 2.458e-01 | 2.462e-01  |               | 1.922e-01  |                | 1.417e+09 | B    |
| $9f\ ^2F_{5/2}$ | $6g\ ^2G_{7/2}$  | 87.40           |                     | 2.697e-03 | 3.283e-03  |               | 9.374e-03  |                | 1.364e+09 | C    |
| $9f\ ^2F_{5/2}$ | $7g\ ^2G_{7/2}$  | 167.46          |                     | 3.063e-02 | 3.247e-02  |               | 5.555e-02  |                | 2.202e+09 | B+   |
| $9f\ ^2F_{5/2}$ | $8g\ ^2G_{7/2}$  | 413.45          |                     | 6.334e-01 | 6.433e-01  |               | 4.654e-01  |                | 3.027e+09 | B    |
| $9f\ ^2F_{7/2}$ | $3d\ ^2D_{5/2}$  | 13.13           |                     | 2.014e-03 | 2.719e-03  |               | 4.661e-02  |                | 2.255e+11 | D+   |
| $9f\ ^2F_{7/2}$ | $4d\ ^2D_{5/2}$  | 26.00           |                     | 1.125e-02 | 1.167e-02  |               | 1.315e-01  |                | 1.622e+11 | B    |
| $9f\ ^2F_{7/2}$ | $5d\ ^2D_{5/2}$  | 47.27           |                     | 3.964e-02 | 3.897e-02  |               | 2.547e-01  |                | 9.503e+10 | B+   |
| $9f\ ^2F_{7/2}$ | $6d\ ^2D_{5/2}$  | 84.73           |                     | 1.385e-01 | 1.328e-01  |               | 4.965e-01  |                | 5.766e+10 | B+   |
| $9f\ ^2F_{7/2}$ | $7d\ ^2D_{5/2}$  | 161.17          |                     | 5.498e-01 | 5.707e-01  |               | 1.036e+00  |                | 3.326e+10 | B+   |
| $9f\ ^2F_{7/2}$ | $8d\ ^2D_{5/2}$  | 388.22          |                     | 4.862e+00 | 4.873e+00  |               | 3.804e+00  |                | 2.105e+10 | B    |
| $9f\ ^2F_{7/2}$ | $8g\ ^2G_{7/2}$  | 413.22          |                     | 2.311e-02 | 2.340e-02  |               | 1.699e-02  |                | 8.297e+07 | C+   |
| $9f\ ^2F_{7/2}$ | $5g\ ^2G_{9/2}$  | 48.76           |                     | 3.574e-04 | 4.062e-04  |               | 2.226e-03  |                | 7.806e+08 | C+   |
| $9f\ ^2F_{7/2}$ | $6g\ ^2G_{9/2}$  | 87.43           |                     | 3.770e-03 | 4.224e-03  |               | 1.310e-02  |                | 1.429e+09 | C+   |
| $9f\ ^2F_{7/2}$ | $7g\ ^2G_{9/2}$  | 167.56          |                     | 3.954e-02 | 4.181e-02  |               | 7.168e-02  |                | 2.129e+09 | B+   |
| $9f\ ^2F_{7/2}$ | $8g\ ^2G_{9/2}$  | 413.69          |                     | 8.057e-01 | 8.281e-01  |               | 5.916e-01  |                | 2.882e+09 | B    |
| $9g\ ^2G_{7/2}$ | $4f\ ^2F_{5/2}$  | 26.76           |                     | 7.958e-03 | 8.207e-03  |               | 9.032e-02  |                | 1.051e+11 | B    |
| $9g\ ^2G_{7/2}$ | $5f\ ^2F_{5/2}$  | 48.50           |                     | 4.032e-02 | 4.143e-02  |               | 2.525e-01  |                | 8.953e+10 | B+   |
| $9g\ ^2G_{7/2}$ | $6f\ ^2F_{5/2}$  | 86.85           |                     | 1.676e-01 | 1.707e-01  |               | 5.862e-01  |                | 6.479e+10 | B+   |
| $9g\ ^2G_{7/2}$ | $7f\ ^2F_{5/2}$  | 166.04          |                     | 8.255e-01 | 8.340e-01  |               | 1.510e+00  |                | 4.567e+10 | B+   |
| $9g\ ^2G_{7/2}$ | $8f\ ^2F_{5/2}$  | 406.66          |                     | 8.284e+00 | 8.283e+00  |               | 6.188e+00  |                | 3.120e+10 | B    |
| $9g\ ^2G_{7/2}$ | $4f\ ^2F_{7/2}$  | 26.79           |                     | 2.944e-04 | 3.015e-04  |               | 3.338e-03  |                | 3.878e+09 | C+   |
| $9g\ ^2G_{7/2}$ | $5f\ ^2F_{7/2}$  | 48.54           |                     | 1.490e-03 | 1.528e-03  |               | 9.324e-03  |                | 3.300e+09 | C+   |
| $9g\ ^2G_{7/2}$ | $6f\ ^2F_{7/2}$  | 86.93           |                     | 6.223e-03 | 6.317e-03  |               | 2.174e-02  |                | 2.399e+09 | B    |
| $9g\ ^2G_{7/2}$ | $7f\ ^2F_{7/2}$  | 166.19          |                     | 3.046e-02 | 3.096e-02  |               | 5.567e-02  |                | 1.680e+09 | B+   |
| $9g\ ^2G_{7/2}$ | $8f\ ^2F_{7/2}$  | 407.13          |                     | 3.067e-01 | 3.093e-01  |               | 2.288e-01  |                | 1.151e+09 | B    |
| $9g\ ^2G_{7/2}$ | $6h\ ^2H_{9/2}$  | 87.34           |                     | 6.376e-04 | 8.244e-04  |               | 2.218e-03  |                | 2.424e+08 | D+   |
| $9g\ ^2G_{7/2}$ | $7h\ ^2H_{9/2}$  | 167.19          |                     | 1.440e-02 | 1.518e-02  |               | 2.616e-02  |                | 7.802e+08 | B    |
| $9g\ ^2G_{7/2}$ | $8h\ ^2H_{9/2}$  | 411.21          |                     | 4.250e-01 | 4.262e-01  |               | 3.140e-01  |                | 1.548e+09 | B    |
| $9g\ ^2G_{9/2}$ | $4f\ ^2F_{7/2}$  | 26.79           |                     | 1.022e-02 | 1.061e-02  |               | 1.159e-01  |                | 1.077e+11 | B    |
| $9g\ ^2G_{9/2}$ | $5f\ ^2F_{7/2}$  | 48.54           |                     | 5.188e-02 | 5.365e-02  |               | 3.247e-01  |                | 9.191e+10 | B+   |
| $9g\ ^2G_{9/2}$ | $6f\ ^2F_{7/2}$  | 86.93           |                     | 2.162e-01 | 2.213e-01  |               | 7.554e-01  |                | 6.668e+10 | B+   |
| $9g\ ^2G_{9/2}$ | $7f\ ^2F_{7/2}$  | 166.19          |                     | 1.058e+00 | 1.082e+00  |               | 1.934e+00  |                | 4.669e+10 | B+   |
| $9g\ ^2G_{9/2}$ | $8f\ ^2F_{7/2}$  | 407.06          |                     | 1.067e+01 | 1.077e+01  |               | 7.960e+00  |                | 3.204e+10 | B    |
| $9g\ ^2G_{9/2}$ | $6h\ ^2H_{11/2}$ | 87.37           |                     | 9.824e-04 | 1.008e-03  |               | 3.416e-03  |                | 2.985e+08 | C+   |
| $9g\ ^2G_{9/2}$ | $7h\ ^2H_{11/2}$ | 167.27          |                     | 1.808e-02 | 1.857e-02  |               | 3.283e-02  |                | 7.827e+08 | B    |
| $9g\ ^2G_{9/2}$ | $8h\ ^2H_{11/2}$ | 411.66          |                     | 5.280e-01 | 5.211e-01  |               | 3.896e-01  |                | 1.533e+09 | B    |

Table S2 – continued from previous page

| Upper level      | Lower level      | $\lambda$ [RCI] | $\lambda$ Ref. [48] | $S$ [RCI] | $S$ [MBPT] | $S$ Ref. [22] | $gf$ [RCI] | $gf$ Ref. [24] | $A$ [RCI] | Unc. |
|------------------|------------------|-----------------|---------------------|-----------|------------|---------------|------------|----------------|-----------|------|
| $9h\ ^2H_{11/2}$ | $5g\ ^2G_{9/2}$  | 48.71           |                     | 4.080e-02 | 4.107e-02  |               | 2.544e-01  |                | 5.959e+10 | B+   |
| $9h\ ^2H_{11/2}$ | $6g\ ^2G_{9/2}$  | 87.27           |                     | 2.623e-01 | 2.636e-01  |               | 9.129e-01  |                | 6.663e+10 | B+   |
| $9h\ ^2H_{11/2}$ | $7g\ ^2G_{9/2}$  | 166.98          |                     | 1.568e+00 | 1.574e+00  |               | 2.851e+00  |                | 5.684e+10 | B+   |
| $9h\ ^2H_{11/2}$ | $8g\ ^2G_{9/2}$  | 410.17          |                     | 1.762e+01 | 1.768e+01  |               | 1.305e+01  |                | 4.311e+10 | B    |
| $9h\ ^2H_{11/2}$ | $7i\ ^2I_{13/2}$ | 167.18          |                     | 5.551e-03 | 5.533e-03  |               | 1.009e-02  |                | 2.006e+08 | B    |
| $9h\ ^2H_{11/2}$ | $8i\ ^2I_{13/2}$ | 410.97          |                     | 2.869e-01 | 2.885e-01  |               | 2.120e-01  |                | 6.978e+08 | B    |
| $9h\ ^2H_{9/2}$  | $5g\ ^2G_{7/2}$  | 48.70           |                     | 3.220e-02 | 3.349e-02  |               | 2.009e-01  |                | 5.650e+10 | B+   |
| $9h\ ^2H_{9/2}$  | $6g\ ^2G_{7/2}$  | 87.24           |                     | 2.104e-01 | 2.148e-01  |               | 7.325e-01  |                | 6.420e+10 | B+   |
| $9h\ ^2H_{9/2}$  | $7g\ ^2G_{7/2}$  | 166.90          |                     | 1.271e+00 | 1.282e+00  |               | 2.314e+00  |                | 5.540e+10 | B+   |
| $9h\ ^2H_{9/2}$  | $8g\ ^2G_{7/2}$  | 410.06          |                     | 1.436e+01 | 1.438e+01  |               | 1.064e+01  |                | 4.220e+10 | B    |
| $9h\ ^2H_{9/2}$  | $5g\ ^2G_{9/2}$  | 48.72           |                     | 7.437e-04 | 7.574e-04  |               | 4.637e-03  |                | 1.303e+09 | C+   |
| $9h\ ^2H_{9/2}$  | $6g\ ^2G_{9/2}$  | 87.29           |                     | 4.806e-03 | 4.872e-03  |               | 1.673e-02  |                | 1.464e+09 | B    |
| $9h\ ^2H_{9/2}$  | $7g\ ^2G_{9/2}$  | 167.04          |                     | 2.889e-02 | 2.914e-02  |               | 5.254e-02  |                | 1.256e+09 | B+   |
| $9h\ ^2H_{9/2}$  | $8g\ ^2G_{9/2}$  | 410.52          |                     | 3.272e-01 | 3.282e-01  |               | 2.421e-01  |                | 9.583e+08 | B    |
| $9h\ ^2H_{9/2}$  | $7i\ ^2I_{11/2}$ | 167.19          |                     | 4.615e-03 | 4.681e-03  |               | 8.384e-03  |                | 2.001e+08 | B    |
| $9h\ ^2H_{9/2}$  | $8i\ ^2I_{11/2}$ | 411.16          |                     | 2.440e-01 | 2.441e-01  |               | 1.802e-01  |                | 7.111e+08 | B    |
| $9i\ ^2I_{11/2}$ | $6h\ ^2H_{9/2}$  | 87.31           |                     | 1.714e-01 | 1.719e-01  |               | 5.963e-01  |                | 4.348e+10 | B+   |
| $9i\ ^2I_{11/2}$ | $7h\ ^2H_{9/2}$  | 167.08          |                     | 1.638e+00 | 1.638e+00  |               | 2.979e+00  |                | 5.931e+10 | B+   |
| $9i\ ^2I_{11/2}$ | $8h\ ^2H_{9/2}$  | 410.56          |                     | 2.273e+01 | 2.274e+01  |               | 1.682e+01  |                | 5.545e+10 | B    |
| $9i\ ^2I_{11/2}$ | $6h\ ^2H_{11/2}$ | 87.34           |                     | 2.633e-03 | 2.637e-03  |               | 9.158e-03  |                | 6.673e+08 | C+   |
| $9i\ ^2I_{11/2}$ | $7h\ ^2H_{11/2}$ | 167.17          |                     | 2.517e-02 | 2.518e-02  |               | 4.573e-02  |                | 9.096e+08 | B    |
| $9i\ ^2I_{11/2}$ | $8h\ ^2H_{11/2}$ | 411.07          |                     | 3.508e-01 | 3.505e-01  |               | 2.592e-01  |                | 8.527e+08 | B    |
| $9i\ ^2I_{13/2}$ | $6h\ ^2H_{11/2}$ | 87.33           |                     | 2.031e-01 | 2.036e-01  |               | 7.065e-01  |                | 4.414e+10 | B+   |
| $9i\ ^2I_{13/2}$ | $7h\ ^2H_{11/2}$ | 167.15          |                     | 1.939e+00 | 1.941e+00  |               | 3.524e+00  |                | 6.010e+10 | B+   |
| $9i\ ^2I_{13/2}$ | $8h\ ^2H_{11/2}$ | 410.93          |                     | 2.696e+01 | 2.696e+01  |               | 1.993e+01  |                | 5.624e+10 | B    |
| $9p\ ^2P_{1/2}$  | $3s\ ^2S_{1/2}$  | 11.40           |                     | 1.942e-04 | 2.336e-04  |               | 5.174e-03  |                | 1.327e+11 | C    |
| $9p\ ^2P_{1/2}$  | $4s\ ^2S_{1/2}$  | 23.38           |                     | 7.048e-04 | 8.546e-04  |               | 9.159e-03  |                | 5.590e+10 | C    |
| $9p\ ^2P_{1/2}$  | $5s\ ^2S_{1/2}$  | 43.23           |                     | 2.763e-03 | 2.782e-03  |               | 1.941e-02  |                | 3.464e+10 | C+   |
| $9p\ ^2P_{1/2}$  | $6s\ ^2S_{1/2}$  | 78.17           |                     | 1.118e-02 | 9.623e-03  |               | 4.344e-02  |                | 2.371e+10 | C+   |
| $9p\ ^2P_{1/2}$  | $7s\ ^2S_{1/2}$  | 149.51          |                     | 4.975e-02 | 4.237e-02  |               | 1.011e-01  |                | 1.508e+10 | C+   |
| $9p\ ^2P_{1/2}$  | $8s\ ^2S_{1/2}$  | 358.16          |                     | 3.872e-01 | 3.640e-01  |               | 3.284e-01  |                | 8.539e+09 | B    |
| $9p\ ^2P_{1/2}$  | $9s\ ^2S_{1/2}$  | 6534.30         |                     | 1.329e+01 | 1.309e+01  |               | 6.179e-01  |                | 4.827e+07 | E    |
| $9p\ ^2P_{1/2}$  | $3d\ ^2D_{3/2}$  | 13.15           |                     | 6.040e-05 | 4.860e-05  |               | 1.396e-03  |                | 2.693e+10 | C    |
| $9p\ ^2P_{1/2}$  | $4d\ ^2D_{3/2}$  | 26.15           |                     | 3.663e-04 | 4.376e-04  |               | 4.255e-03  |                | 2.075e+10 | C    |
| $9p\ ^2P_{1/2}$  | $5d\ ^2D_{3/2}$  | 47.86           |                     | 2.061e-03 | 2.299e-03  |               | 1.308e-02  |                | 1.904e+10 | C+   |
| $9p\ ^2P_{1/2}$  | $6d\ ^2D_{3/2}$  | 86.74           |                     | 1.092e-02 | 1.161e-02  |               | 3.825e-02  |                | 1.696e+10 | B    |
| $9p\ ^2P_{1/2}$  | $7d\ ^2D_{3/2}$  | 169.36          |                     | 8.373e-02 | 7.623e-02  |               | 1.502e-01  |                | 1.746e+10 | C+   |
| $9p\ ^2P_{1/2}$  | $8d\ ^2D_{3/2}$  | 439.76          |                     | 1.284e+00 | 1.264e+00  |               | 8.868e-01  |                | 1.529e+10 | B    |
| $9p\ ^2P_{3/2}$  | $3s\ ^2S_{1/2}$  | 11.40           |                     | 3.848e-04 | 4.397e-04  |               | 1.026e-02  |                | 1.316e+11 | C+   |

Table S2 – continued from previous page

| Upper level    | Lower level    | $\lambda$ [RCI] | $\lambda$ Ref. [48] | $S$ [RCI] | $S$ [MBPT] | $S$ Ref. [22] | $gf$ [RCI] | $gf$ Ref. [24] | $A$ [RCI] | Unc. |
|----------------|----------------|-----------------|---------------------|-----------|------------|---------------|------------|----------------|-----------|------|
| $9p\ ^2P\ 3/2$ | $4s\ ^2S\ 1/2$ | 23.36           |                     | 1.375e-03 | 1.593e-03  |               | 1.789e-02  |                | 5.468e+10 | C+   |
| $9p\ ^2P\ 3/2$ | $5s\ ^2S\ 1/2$ | 43.16           |                     | 5.287e-03 | 5.130e-03  |               | 3.721e-02  |                | 3.330e+10 | B    |
| $9p\ ^2P\ 3/2$ | $6s\ ^2S\ 1/2$ | 77.95           |                     | 2.097e-02 | 1.750e-02  |               | 8.173e-02  |                | 2.243e+10 | C    |
| $9p\ ^2P\ 3/2$ | $7s\ ^2S\ 1/2$ | 148.68          |                     | 9.152e-02 | 7.551e-02  |               | 1.870e-01  |                | 1.410e+10 | C    |
| $9p\ ^2P\ 3/2$ | $8s\ ^2S\ 1/2$ | 353.44          |                     | 6.707e-01 | 6.192e-01  |               | 5.764e-01  |                | 7.694e+09 | C+   |
| $9p\ ^2P\ 3/2$ | $9s\ ^2S\ 1/2$ | 5254.82         |                     | 2.617e+01 | 2.622e+01  |               | 1.513e+00  |                | 9.136e+07 | E    |
| $9p\ ^2P\ 3/2$ | $3d\ ^2D\ 3/2$ | 13.14           |                     | 1.110e-05 | 8.740e-06  |               | 2.557e-04  |                | 2.469e+09 | D+   |
| $9p\ ^2P\ 3/2$ | $4d\ ^2D\ 3/2$ | 26.12           |                     | 7.080e-05 | 8.030e-05  |               | 8.230e-04  |                | 2.011e+09 | C    |
| $9p\ ^2P\ 3/2$ | $5d\ ^2D\ 3/2$ | 47.78           |                     | 3.961e-04 | 4.233e-04  |               | 2.519e-03  |                | 1.840e+09 | C+   |
| $9p\ ^2P\ 3/2$ | $6d\ ^2D\ 3/2$ | 86.46           |                     | 2.098e-03 | 2.138e-03  |               | 7.371e-03  |                | 1.644e+09 | C+   |
| $9p\ ^2P\ 3/2$ | $7d\ ^2D\ 3/2$ | 168.30          |                     | 1.572e-02 | 1.395e-02  |               | 2.837e-02  |                | 1.670e+09 | C+   |
| $9p\ ^2P\ 3/2$ | $8d\ ^2D\ 3/2$ | 432.67          |                     | 2.305e-01 | 2.240e-01  |               | 1.618e-01  |                | 1.441e+09 | B    |
| $9p\ ^2P\ 3/2$ | $4d\ ^2D\ 5/2$ | 26.18           |                     | 8.098e-04 | 7.236e-04  |               | 9.395e-03  |                | 2.285e+10 | C+   |
| $9p\ ^2P\ 3/2$ | $5d\ ^2D\ 5/2$ | 47.89           |                     | 4.833e-03 | 3.851e-03  |               | 3.065e-02  |                | 2.228e+10 | D+   |
| $9p\ ^2P\ 3/2$ | $6d\ ^2D\ 5/2$ | 86.75           |                     | 2.457e-02 | 1.955e-02  |               | 8.604e-02  |                | 1.907e+10 | D+   |
| $9p\ ^2P\ 3/2$ | $7d\ ^2D\ 5/2$ | 168.63          |                     | 1.248e-01 | 1.281e-01  |               | 2.248e-01  |                | 1.319e+10 | B+   |
| $9p\ ^2P\ 3/2$ | $8d\ ^2D\ 5/2$ | 434.51          |                     | 2.109e+00 | 2.078e+00  |               | 1.474e+00  |                | 1.302e+10 | B    |
| $9s\ ^2S\ 1/2$ | $3p\ ^2P\ 1/2$ | 12.05           |                     | 7.630e-05 | 8.490e-05  |               | 1.923e-03  |                | 4.419e+10 | C    |
| $9s\ ^2S\ 1/2$ | $4p\ ^2P\ 1/2$ | 24.53           |                     | 3.684e-04 | 4.422e-04  |               | 4.562e-03  |                | 2.529e+10 | C    |
| $9s\ ^2S\ 1/2$ | $5p\ ^2P\ 1/2$ | 45.36           |                     | 1.711e-03 | 1.838e-03  |               | 1.146e-02  |                | 1.858e+10 | C+   |
| $9s\ ^2S\ 1/2$ | $6p\ ^2P\ 1/2$ | 82.56           |                     | 7.806e-03 | 7.990e-03  |               | 2.872e-02  |                | 1.405e+10 | B    |
| $9s\ ^2S\ 1/2$ | $7p\ ^2P\ 1/2$ | 161.10          |                     | 4.900e-02 | 4.612e-02  |               | 9.239e-02  |                | 1.187e+10 | B+   |
| $9s\ ^2S\ 1/2$ | $8p\ ^2P\ 1/2$ | 412.86          |                     | 6.556e-01 | 6.521e-01  |               | 4.824e-01  |                | 9.438e+09 | B    |
| $9s\ ^2S\ 1/2$ | $3p\ ^2P\ 3/2$ | 12.20           |                     | 1.939e-04 | 1.805e-04  |               | 4.828e-03  |                | 1.082e+11 | C+   |
| $9s\ ^2S\ 1/2$ | $4p\ ^2P\ 3/2$ | 24.78           |                     | 8.073e-04 | 9.381e-04  |               | 9.895e-03  |                | 5.373e+10 | C+   |
| $9s\ ^2S\ 1/2$ | $5p\ ^2P\ 3/2$ | 45.79           |                     | 3.444e-03 | 3.922e-03  |               | 2.285e-02  |                | 3.634e+10 | C+   |
| $9s\ ^2S\ 1/2$ | $6p\ ^2P\ 3/2$ | 83.37           |                     | 1.580e-02 | 1.717e-02  |               | 5.758e-02  |                | 2.763e+10 | B    |
| $9s\ ^2S\ 1/2$ | $7p\ ^2P\ 3/2$ | 162.90          |                     | 9.540e-02 | 1.004e-01  |               | 1.779e-01  |                | 2.236e+10 | B+   |
| $9s\ ^2S\ 1/2$ | $8p\ ^2P\ 3/2$ | 421.36          |                     | 1.491e+00 | 1.474e+00  |               | 1.075e+00  |                | 2.019e+10 | B    |

Table S3: Wavelengths ( $\lambda$ , in Å) in vacuum, weighted oscillator strengths ( $gf$ , dimensionless), line strengths ( $S$ , in atomic units) and transition rates ( $A$ , in  $s^{-1}$ ) for E1 transitions from the present (RCI (corresponding to adjusted energy values)) and MBPT and previous results of Sampson et al. [24], Matsushima et al. [18], Vilkas et al. [21], Johnson et al. [52] and NIST ASD [48] for  $Xe^{43+}$ . The estimated uncertainty (Unc.) in the  $A$  values are presented in the last column.

| Upper level   | Lower level   | $\lambda$ [RCI] | $\lambda$ Ref. | $gf$ [RCI] | $gf$ Ref. [24] | $S$ [RCI] | $S$ [MBPT] | $A$ [RCI]     | $A$ Ref.      | Unc. |
|---------------|---------------|-----------------|----------------|------------|----------------|-----------|------------|---------------|---------------|------|
| $3d^2D_{3/2}$ | $3p^2P_{1/2}$ | 58.29           | 59.10 [48]     | 3.375e-01  | 3.430e-01      | 6.476e-02 | 6.610e-02  | 1.656e+11     | 1.66e+11 [21] | A    |
| $3d^2D_{3/2}$ | $3p^2P_{3/2}$ | 97.99           |                | 3.993e-02  | 4.080e-02      | 1.288e-02 | 1.312e-02  | 6.935e+09     | 6.96e+09 [21] | A+   |
| $3d^2D_{5/2}$ | $3p^2P_{3/2}$ | 85.00           | 84.80 [48]     | 4.219e-01  | 4.296e-01      | 1.181e-01 | 1.202e-01  | 6.492e+10     | 6.52e+10 [21] | A+   |
| $3p^2P_{1/2}$ | $3s^2S_{1/2}$ | 123.92          | 123.92 [48]    | 1.078e-01  | 1.094e-01      | 4.399e-02 | 4.481e-02  | 2.341e+10     | 2.34e+10 [21] | A+   |
| $3p^2P_{3/2}$ | $3s^2S_{1/2}$ | 66.57           | 66.58 [48]     | 4.183e-01  |                | 9.169e-02 | 9.336e-02  | 1.578e+11     | 1.57e+11 [21] | A+   |
|               |               |                 |                |            |                |           |            | 1.57e+11 [52] |               |      |
| $4d^2D_{3/2}$ | $3p^2P_{1/2}$ | 8.03            | 8.03 [18]      | 8.268e-01  | 8.190e-01      | 2.185e-02 | 2.186e-02  | 2.139e+13     |               | A+   |
| $4d^2D_{3/2}$ | $4p^2P_{1/2}$ | 149.38          |                | 5.756e-01  |                | 2.831e-01 | 2.844e-01  | 4.301e+10     |               | A    |
| $4d^2D_{3/2}$ | $3p^2P_{3/2}$ | 8.50            | 8.50 [18]      | 1.963e-01  | 1.952e-01      | 5.494e-03 | 5.504e-03  | 4.527e+12     |               | A+   |
| $4d^2D_{5/2}$ | $3p^2P_{3/2}$ | 8.45            | 8.45 [18]      | 1.699e+00  | 1.694e+00      | 4.729e-02 | 4.737e-02  | 2.643e+13     |               | A+   |
| $4d^2D_{5/2}$ | $4p^2P_{3/2}$ | 219.99          |                | 7.113e-01  |                | 5.152e-01 | 5.174e-01  | 1.634e+10     |               | A    |
| $4f^2F_{5/2}$ | $3d^2D_{3/2}$ | 9.08            | 9.08 [18]      | 3.767e+00  | 3.791e+00      | 1.126e-01 | 1.146e-01  | 5.081e+13     |               | A+   |
| $4f^2F_{5/2}$ | $3d^2D_{5/2}$ | 9.21            |                | 2.723e-01  | 2.724e-01      | 8.256e-03 | 8.390e-03  | 3.569e+12     |               | A+   |
| $4f^2F_{7/2}$ | $3d^2D_{5/2}$ | 9.19            | 9.19 [18]      | 5.435e+00  | 5.493e+00      | 1.644e-01 | 1.671e-01  | 5.371e+13     |               | A+   |
| $4p^2P_{1/2}$ | $3s^2S_{1/2}$ | 7.94            | 7.94 [18]      | 2.424e-01  | 2.440e-01      | 6.337e-03 | 6.249e-03  | 1.282e+13     |               | A+   |
| $4p^2P_{1/2}$ | $4s^2S_{1/2}$ | 298.00          |                | 1.606e-01  |                | 1.576e-01 | 1.583e-01  | 6.033e+09     |               | B+   |
| $4p^2P_{1/2}$ | $3d^2D_{3/2}$ | 9.93            | 9.93 [18]      | 9.455e-02  | 9.240e-02      | 3.091e-03 | 2.993e-03  | 3.199e+12     |               | B+   |
| $4p^2P_{3/2}$ | $3s^2S_{1/2}$ | 7.77            | 7.76 [18]      | 3.703e-01  | 3.710e-01      | 9.468e-03 | 9.292e-03  | 1.024e+13     |               | A+   |
| $4p^2P_{3/2}$ | $4s^2S_{1/2}$ | 161.80          |                | 6.076e-01  |                | 3.236e-01 | 3.251e-01  | 3.870e+10     |               | A    |
| $4p^2P_{3/2}$ | $3d^2D_{3/2}$ | 9.66            |                | 1.348e-02  | 1.320e-02      | 4.285e-04 | 4.133e-04  | 2.409e+11     |               | B+   |
| $4p^2P_{3/2}$ | $3d^2D_{5/2}$ | 9.81            | 9.80 [18]      | 1.329e-01  | 1.296e-01      | 4.292e-03 | 4.145e-03  | 2.306e+12     |               | B+   |
| $4s^2S_{1/2}$ | $3p^2P_{1/2}$ | 8.73            | 8.73 [18]      | 9.067e-02  | 8.600e-02      | 2.607e-03 | 2.559e-03  | 3.966e+12     | 3.97e+12 [52] | A+   |
| $4s^2S_{1/2}$ | $3p^2P_{3/2}$ | 9.30            | 9.29 [18]      | 2.491e-01  | 2.400e-01      | 7.623e-03 | 7.511e-03  | 9.610e+12     | 9.61e+12 [52] | A+   |
| $5d^2D_{3/2}$ | $3p^2P_{1/2}$ | 5.75            | 5.75 [18]      | 2.292e-01  | 2.298e-01      | 4.338e-03 | 4.374e-03  | 1.157e+13     |               | A+   |
| $5d^2D_{3/2}$ | $4p^2P_{1/2}$ | 17.82           | 17.82 [18]     | 7.459e-01  |                | 4.377e-02 | 4.372e-02  | 3.916e+12     |               | A+   |
| $5d^2D_{3/2}$ | $5p^2P_{1/2}$ | 301.97          |                | 7.846e-01  |                | 7.800e-01 | 7.810e-01  | 1.435e+10     |               | B+   |
| $5d^2D_{3/2}$ | $3p^2P_{3/2}$ | 5.99            |                | 4.988e-02  | 5.000e-02      | 9.831e-04 | 9.930e-04  | 2.320e+12     |               | A    |
| $5d^2D_{3/2}$ | $4p^2P_{3/2}$ | 18.77           |                | 1.860e-01  |                | 1.149e-02 | 1.149e-02  | 8.809e+11     |               | A+   |
| $5d^2D_{3/2}$ | $4f^2F_{5/2}$ | 21.42           |                | 8.169e-02  |                | 5.761e-03 | 5.762e-03  | 2.969e+11     |               | A+   |
| $5d^2D_{5/2}$ | $3p^2P_{3/2}$ | 5.97            | 5.97 [18]      | 4.418e-01  | 4.468e-01      | 8.690e-03 | 8.773e-03  | 1.376e+13     |               | A+   |
| $5d^2D_{5/2}$ | $4p^2P_{3/2}$ | 18.64           | 18.64 [18]     | 1.588e+00  |                | 9.749e-02 | 9.741e-02  | 5.080e+12     |               | A+   |
| $5d^2D_{5/2}$ | $5p^2P_{3/2}$ | 445.85          |                | 9.667e-01  |                | 1.419e+00 | 1.421e+00  | 5.407e+09     |               | B    |
| $5d^2D_{5/2}$ | $4f^2F_{5/2}$ | 21.26           |                | 5.222e-03  |                | 3.655e-04 | 3.655e-04  | 1.284e+10     |               | B+   |
| $5d^2D_{5/2}$ | $4f^2F_{7/2}$ | 21.39           |                | 1.097e-01  |                | 7.729e-03 | 7.727e-03  | 2.666e+11     |               | A+   |

Table S3 – continued from previous page

| Upper level    | Lower level    | $\lambda$ [RCI] | $\lambda$ Ref. | $gf$ [RCI] | $gf$ Ref. [24] | $S$ [RCI] | $S$ [MBPT] | $A$ [RCI] | $A$ Ref. | Unc. |
|----------------|----------------|-----------------|----------------|------------|----------------|-----------|------------|-----------|----------|------|
| $5f^2 F_{5/2}$ | $3d^2 D_{3/2}$ | 6.32            | 6.32 [18]      | 6.347e-01  | 6.552e-01      | 1.321e-02 | 1.368e-02  | 1.766e+13 |          | B+   |
| $5f^2 F_{5/2}$ | $4d^2 D_{3/2}$ | 19.69           | 19.70 [18]     | 3.145e+00  |                | 2.039e-01 | 2.047e-01  | 9.016e+12 |          | A+   |
| $5f^2 F_{5/2}$ | $3d^2 D_{5/2}$ | 6.38            |                | 4.474e-02  | 4.560e-02      | 9.403e-04 | 9.717e-04  | 1.220e+12 |          | B+   |
| $5f^2 F_{5/2}$ | $4d^2 D_{5/2}$ | 19.96           |                | 2.314e-01  |                | 1.521e-02 | 1.526e-02  | 6.459e+11 |          | A+   |
| $5f^2 F_{7/2}$ | $3d^2 D_{5/2}$ | 6.38            | 6.38 [18]      | 9.042e-01  | 9.360e-01      | 1.899e-02 | 1.964e-02  | 1.853e+13 |          | B+   |
| $5f^2 F_{7/2}$ | $4d^2 D_{5/2}$ | 19.90           | 19.91 [18]     | 4.576e+00  |                | 2.998e-01 | 3.009e-01  | 9.636e+12 |          | A+   |
| $5g^2 G_{7/2}$ | $4f^2 F_{5/2}$ | 20.69           | 20.68 [18]     | 7.941e+00  |                | 5.408e-01 | 5.435e-01  | 1.547e+13 |          | A+   |
| $5g^2 G_{7/2}$ | $4f^2 F_{7/2}$ | 20.81           |                | 2.948e-01  |                | 2.020e-02 | 2.030e-02  | 5.677e+11 |          | A+   |
| $5g^2 G_{9/2}$ | $4f^2 F_{7/2}$ | 20.77           | 20.77 [18]     | 1.032e+01  |                | 7.057e-01 | 7.092e-01  | 1.595e+13 |          | A+   |
| $5p^2 P_{1/2}$ | $3s^2 S_{1/2}$ | 5.60            | 5.59 [18]      | 6.612e-02  | 6.600e-02      | 1.218e-03 | 1.205e-03  | 7.045e+12 |          | A    |
| $5p^2 P_{1/2}$ | $4s^2 S_{1/2}$ | 17.81           |                | 2.644e-01  |                | 1.550e-02 | 1.539e-02  | 2.781e+12 |          | A+   |
| $5p^2 P_{1/2}$ | $5s^2 S_{1/2}$ | 591.30          |                | 2.097e-01  |                | 4.082e-01 | 4.087e-01  | 2.000e+09 |          | B    |
| $5p^2 P_{1/2}$ | $3d^2 D_{3/2}$ | 6.51            |                | 1.712e-02  | 1.640e-02      | 3.672e-04 | 3.447e-04  | 1.346e+12 |          | B+   |
| $5p^2 P_{1/2}$ | $4d^2 D_{3/2}$ | 21.69           |                | 2.164e-01  |                | 1.545e-02 | 1.535e-02  | 1.534e+12 |          | A+   |
| $5p^2 P_{3/2}$ | $3s^2 S_{1/2}$ | 5.55            | 5.55 [18]      | 1.097e-01  | 1.096e-01      | 2.006e-03 | 1.973e-03  | 5.941e+12 |          | A+   |
| $5p^2 P_{3/2}$ | $4s^2 S_{1/2}$ | 17.37           |                | 3.923e-01  |                | 2.243e-02 | 2.223e-02  | 2.168e+12 |          | A+   |
| $5p^2 P_{3/2}$ | $5s^2 S_{1/2}$ | 321.62          |                | 7.851e-01  |                | 8.313e-01 | 8.324e-01  | 1.266e+10 |          | B+   |
| $5p^2 P_{3/2}$ | $3d^2 D_{3/2}$ | 6.45            |                | 2.568e-03  | 2.400e-03      | 5.458e-05 | 5.084e-05  | 1.028e+11 |          | B    |
| $5p^2 P_{3/2}$ | $4d^2 D_{3/2}$ | 21.04           |                | 3.143e-02  |                | 2.177e-03 | 2.161e-03  | 1.184e+11 |          | A+   |
| $5p^2 P_{3/2}$ | $3d^2 D_{5/2}$ | 6.52            |                | 2.496e-02  | 2.400e-02      | 5.359e-04 | 4.993e-04  | 9.792e+11 |          | B    |
| $5p^2 P_{3/2}$ | $4d^2 D_{5/2}$ | 21.35           |                | 3.094e-01  |                | 2.175e-02 | 2.157e-02  | 1.133e+12 |          | A+   |
| $5s^2 S_{1/2}$ | $3p^2 P_{1/2}$ | 5.92            | 5.92 [18]      | 1.999e-02  | 1.880e-02      | 3.896e-04 | 3.779e-04  | 1.904e+12 |          | B+   |
| $5s^2 S_{1/2}$ | $4p^2 P_{1/2}$ | 19.57           |                | 1.487e-01  |                | 9.580e-03 | 9.575e-03  | 1.296e+12 |          | A+   |
| $5s^2 S_{1/2}$ | $3p^2 P_{3/2}$ | 6.17            | 6.17 [18]      | 5.155e-02  | 4.920e-02      | 1.047e-03 | 1.020e-03  | 4.513e+12 |          | A    |
| $5s^2 S_{1/2}$ | $4p^2 P_{3/2}$ | 20.71           | 20.71 [18]     | 4.009e-01  |                | 2.733e-02 | 2.730e-02  | 3.117e+12 |          | A+   |
| $6d^2 D_{3/2}$ | $3p^2 P_{1/2}$ | 4.98            | 4.98 [18]      | 9.938e-02  |                | 1.630e-03 | 1.659e-03  | 6.675e+12 |          | A+   |
| $6d^2 D_{3/2}$ | $4p^2 P_{1/2}$ | 12.07           |                | 2.245e-01  |                | 8.923e-03 | 8.945e-03  | 2.568e+12 |          | A+   |
| $6d^2 D_{3/2}$ | $5p^2 P_{1/2}$ | 33.30           |                | 7.203e-01  |                | 7.898e-02 | 7.901e-02  | 1.083e+12 |          | A+   |
| $6d^2 D_{3/2}$ | $6p^2 P_{1/2}$ | 532.03          |                | 9.812e-01  |                | 1.719e+00 | 1.719e+00  | 5.780e+09 |          | B    |
| $6d^2 D_{3/2}$ | $3p^2 P_{3/2}$ | 5.16            |                | 2.093e-02  |                | 3.556e-04 | 3.621e-04  | 1.310e+12 |          | B+   |
| $6d^2 D_{3/2}$ | $4p^2 P_{3/2}$ | 12.50           |                | 5.118e-02  |                | 2.106e-03 | 2.112e-03  | 5.463e+11 |          | A+   |
| $6d^2 D_{3/2}$ | $5p^2 P_{3/2}$ | 34.95           |                | 1.855e-01  |                | 2.134e-02 | 2.135e-02  | 2.532e+11 |          | A+   |
| $6d^2 D_{3/2}$ | $4f^2 F_{5/2}$ | 13.62           |                | 1.410e-02  |                | 6.325e-04 | 6.432e-04  | 1.267e+11 |          | A    |
| $6d^2 D_{3/2}$ | $5f^2 F_{5/2}$ | 39.44           |                | 2.031e-01  |                | 2.637e-02 | 2.645e-02  | 2.177e+11 |          | A+   |
| $6d^2 D_{5/2}$ | $3p^2 P_{3/2}$ | 5.16            | 5.16 [18]      | 1.870e-01  |                | 3.175e-03 | 3.230e-03  | 7.822e+12 |          | A+   |
| $6d^2 D_{5/2}$ | $4p^2 P_{3/2}$ | 12.47           |                | 4.473e-01  |                | 1.836e-02 | 1.840e-02  | 3.199e+12 |          | A+   |
| $6d^2 D_{5/2}$ | $5p^2 P_{3/2}$ | 34.71           |                | 1.570e+00  |                | 1.794e-01 | 1.794e-01  | 1.449e+12 |          | A+   |
| $6d^2 D_{5/2}$ | $6p^2 P_{3/2}$ | 786.09          |                | 1.208e+00  |                | 3.126e+00 | 3.128e+00  | 2.173e+09 |          | C+   |
| $6d^2 D_{5/2}$ | $4f^2 F_{5/2}$ | 13.59           |                | 9.107e-04  |                | 4.074e-05 | 4.141e-05  | 5.485e+09 |          | C+   |

Table S3 – continued from previous page

| Upper level    | Lower level   | $\lambda$ [RCI] | $\lambda$ Ref. | $gf$ [RCI] | $gf$ Ref. [24] | $S$ [RCI] | $S$ [MBPT] | $A$ [RCI] | $A$ Ref. | Unc. |
|----------------|---------------|-----------------|----------------|------------|----------------|-----------|------------|-----------|----------|------|
| $6d^2D_{5/2}$  | $5f^2F_{5/2}$ | 39.13           |                | 1.306e-02  |                | 1.683e-03 | 1.688e-03  | 9.485e+09 |          | A+   |
| $6d^2D_{5/2}$  | $4f^2F_{7/2}$ | 13.64           |                | 1.903e-02  |                | 8.546e-04 | 8.673e-04  | 1.137e+11 |          | A    |
| $6d^2D_{5/2}$  | $5f^2F_{7/2}$ | 39.36           |                | 2.738e-01  |                | 3.547e-02 | 3.557e-02  | 1.965e+11 |          | A+   |
| $6f^2F_{5/2}$  | $3d^2D_{3/2}$ | 5.43            | 5.43 [18]      | 2.244e-01  |                | 4.009e-03 | 4.212e-03  | 8.477e+12 |          | B+   |
| $6f^2F_{5/2}$  | $4d^2D_{3/2}$ | 13.00           | 13.01 [18]     | 7.239e-01  |                | 3.099e-02 | 3.129e-02  | 4.760e+12 |          | A+   |
| $6f^2F_{5/2}$  | $5d^2D_{3/2}$ | 36.37           |                | 2.884e+00  |                | 3.454e-01 | 3.461e-01  | 2.424e+12 |          | A+   |
| $6f^2F_{5/2}$  | $3d^2D_{5/2}$ | 5.47            |                | 1.567e-02  |                | 2.823e-04 | 2.955e-04  | 5.819e+11 |          | B+   |
| $6f^2F_{5/2}$  | $4d^2D_{5/2}$ | 13.12           |                | 5.192e-02  |                | 2.242e-03 | 2.262e-03  | 3.354e+11 |          | A+   |
| $6f^2F_{5/2}$  | $5d^2D_{5/2}$ | 36.84           |                | 2.146e-01  |                | 2.603e-02 | 2.608e-02  | 1.758e+11 |          | A+   |
| $6f^2F_{5/2}$  | $5g^2G_{7/2}$ | 38.70           |                | 6.469e-02  |                | 8.243e-03 | 8.251e-03  | 4.801e+10 |          | A+   |
| $6f^2F_{7/2}$  | $3d^2D_{5/2}$ | 5.47            | 5.47 [18]      | 3.183e-01  |                | 5.731e-03 | 6.005e-03  | 8.873e+12 |          | B+   |
| $6f^2F_{7/2}$  | $4d^2D_{5/2}$ | 13.10           | 13.11 [18]     | 1.039e+00  |                | 4.481e-02 | 4.522e-02  | 5.045e+12 |          | A+   |
| $6f^2F_{7/2}$  | $5d^2D_{5/2}$ | 36.72           |                | 4.222e+00  |                | 5.104e-01 | 5.113e-01  | 2.610e+12 |          | A+   |
| $6f^2F_{7/2}$  | $5g^2G_{9/2}$ | 38.71           |                | 8.196e-02  |                | 1.045e-02 | 1.046e-02  | 4.561e+10 |          | A+   |
| $6g^2G_{7/2}$  | $4f^2F_{5/2}$ | 13.45           |                | 1.091e+00  |                | 4.829e-02 | 4.883e-02  | 5.028e+12 |          | A+   |
| $6g^2G_{7/2}$  | $5f^2F_{5/2}$ | 38.01           |                | 6.946e+00  |                | 8.692e-01 | 8.712e-01  | 4.008e+12 |          | A+   |
| $6g^2G_{7/2}$  | $4f^2F_{7/2}$ | 13.50           |                | 3.992e-02  |                | 1.775e-03 | 1.794e-03  | 1.826e+11 |          | A+   |
| $6g^2G_{7/2}$  | $5f^2F_{7/2}$ | 38.23           |                | 2.596e-01  |                | 3.267e-02 | 3.275e-02  | 1.482e+11 |          | A+   |
| $6g^2G_{9/2}$  | $4f^2F_{7/2}$ | 13.49           |                | 1.410e+00  |                | 6.264e-02 | 6.333e-02  | 5.168e+12 |          | A+   |
| $6g^2G_{9/2}$  | $5f^2F_{7/2}$ | 38.15           |                | 9.045e+00  |                | 1.136e+00 | 1.139e+00  | 4.145e+12 |          | A+   |
| $6h^2H_{11/2}$ | $5g^2G_{9/2}$ | 38.43           |                | 1.637e+01  |                | 2.071e+00 | 2.074e+00  | 6.161e+12 |          | A+   |
| $6h^2H_{9/2}$  | $5g^2G_{7/2}$ | 38.35           |                | 1.333e+01  |                | 1.683e+00 | 1.685e+00  | 6.043e+12 |          | A+   |
| $6h^2H_{9/2}$  | $5g^2G_{9/2}$ | 38.48           |                | 3.031e-01  |                | 3.840e-02 | 3.845e-02  | 1.365e+11 |          | A+   |
| $6p^2P_{1/2}$  | $3s^2S_{1/2}$ | 4.83            | 4.83 [18]      | 2.898e-02  |                | 4.611e-04 | 4.579e-04  | 4.137e+12 |          | B+   |
| $6p^2P_{1/2}$  | $4s^2S_{1/2}$ | 11.86           |                | 7.365e-02  |                | 2.876e-03 | 2.868e-03  | 1.746e+12 |          | A+   |
| $6p^2P_{1/2}$  | $5s^2S_{1/2}$ | 33.51           |                | 2.902e-01  |                | 3.202e-02 | 3.191e-02  | 8.617e+11 |          | A+   |
| $6p^2P_{1/2}$  | $6s^2S_{1/2}$ | 1032.54         |                | 2.577e-01  |                | 8.761e-01 | 8.763e-01  | 8.062e+08 |          | C    |
| $6p^2P_{1/2}$  | $3d^2D_{3/2}$ | 5.50            |                | 6.419e-03  |                | 1.163e-04 | 1.066e-04  | 7.065e+11 |          | B    |
| $6p^2P_{1/2}$  | $4d^2D_{3/2}$ | 13.47           |                | 4.021e-02  |                | 1.783e-03 | 1.764e-03  | 7.394e+11 |          | A+   |
| $6p^2P_{1/2}$  | $5d^2D_{3/2}$ | 40.26           |                | 3.538e-01  |                | 4.690e-02 | 4.682e-02  | 7.279e+11 |          | A+   |
| $6p^2P_{3/2}$  | $3s^2S_{1/2}$ | 4.81            | 4.81 [18]      | 4.958e-02  |                | 7.859e-04 | 7.745e-04  | 3.567e+12 |          | A    |
| $6p^2P_{3/2}$  | $4s^2S_{1/2}$ | 11.75           |                | 1.189e-01  |                | 4.600e-03 | 4.574e-03  | 1.437e+12 |          | A+   |
| $6p^2P_{3/2}$  | $5s^2S_{1/2}$ | 32.63           |                | 4.228e-01  |                | 4.541e-02 | 4.521e-02  | 6.622e+11 |          | A+   |
| $6p^2P_{3/2}$  | $6s^2S_{1/2}$ | 562.25          |                | 9.589e-01  |                | 1.775e+00 | 1.775e+00  | 5.058e+09 |          | C+   |
| $6p^2P_{3/2}$  | $3d^2D_{3/2}$ | 5.48            |                | 9.758e-04  |                | 1.761e-05 | 1.595e-05  | 5.418e+10 |          | C+   |
| $6p^2P_{3/2}$  | $4d^2D_{3/2}$ | 13.32           |                | 6.159e-03  |                | 2.702e-04 | 2.669e-04  | 5.787e+10 |          | B+   |
| $6p^2P_{3/2}$  | $5d^2D_{3/2}$ | 38.99           |                | 5.213e-02  |                | 6.692e-03 | 6.680e-03  | 5.717e+10 |          | A+   |
| $6p^2P_{3/2}$  | $3d^2D_{5/2}$ | 5.53            |                | 9.437e-03  |                | 1.717e-04 | 1.549e-04  | 5.151e+11 |          | C+   |
| $6p^2P_{3/2}$  | $4d^2D_{5/2}$ | 13.44           |                | 5.980e-02  |                | 2.647e-03 | 2.608e-03  | 5.518e+11 |          | A+   |

Table S3 – continued from previous page

| Upper level   | Lower level   | $\lambda$ [RCI] | $\lambda$ Ref. | $gf$ [RCI] | $gf$ Ref. [24] | $S$ [RCI] | $S$ [MBPT] | $A$ [RCI] | $A$ Ref. | Unc. |
|---------------|---------------|-----------------|----------------|------------|----------------|-----------|------------|-----------|----------|------|
| $6p^2P_{3/2}$ | $5d^2D_{5/2}$ | 39.53           |                | 5.115e-01  |                | 6.657e-02 | 6.639e-02  | 5.458e+11 |          | A+   |
| $6s^2S_{1/2}$ | $3p^2P_{1/2}$ | 5.05            |                | 8.117e-03  |                | 1.351e-04 | 1.313e-04  | 1.060e+12 |          | B+   |
| $6s^2S_{1/2}$ | $4p^2P_{1/2}$ | 12.50           |                | 3.254e-02  |                | 1.339e-03 | 1.340e-03  | 6.941e+11 |          | A+   |
| $6s^2S_{1/2}$ | $5p^2P_{1/2}$ | 36.79           |                | 2.097e-01  |                | 2.540e-02 | 2.548e-02  | 5.166e+11 |          | A+   |
| $6s^2S_{1/2}$ | $3p^2P_{3/2}$ | 5.24            |                | 2.051e-02  |                | 3.537e-04 | 3.440e-04  | 2.493e+12 |          | B+   |
| $6s^2S_{1/2}$ | $4p^2P_{3/2}$ | 12.96           |                | 8.229e-02  |                | 3.511e-03 | 3.506e-03  | 1.634e+12 |          | A+   |
| $6s^2S_{1/2}$ | $5p^2P_{3/2}$ | 38.82           |                | 5.583e-01  |                | 7.135e-02 | 7.148e-02  | 1.236e+12 |          | A+   |
| $7d^2D_{3/2}$ | $3p^2P_{1/2}$ | 4.61            |                | 5.321e-02  |                | 8.083e-04 | 8.309e-04  | 4.169e+12 |          | A    |
| $7d^2D_{3/2}$ | $4p^2P_{1/2}$ | 10.11           |                | 1.023e-01  |                | 3.407e-03 | 3.437e-03  | 1.668e+12 |          | A+   |
| $7d^2D_{3/2}$ | $5p^2P_{1/2}$ | 21.70           |                | 2.235e-01  |                | 1.597e-02 | 1.604e-02  | 7.911e+11 |          | A+   |
| $7d^2D_{3/2}$ | $6p^2P_{1/2}$ | 55.78           |                | 7.199e-01  |                | 1.322e-01 | 1.323e-01  | 3.859e+11 |          | A+   |
| $7d^2D_{3/2}$ | $7p^2P_{1/2}$ | 855.54          |                | 1.171e+00  |                | 3.299e+00 | 3.298e+00  | 2.668e+09 |          | C+   |
| $7d^2D_{3/2}$ | $3p^2P_{3/2}$ | 4.77            |                | 1.102e-02  |                | 1.729e-04 | 1.775e-04  | 8.088e+11 |          | B+   |
| $7d^2D_{3/2}$ | $4p^2P_{3/2}$ | 10.41           |                | 2.254e-02  |                | 7.726e-04 | 7.785e-04  | 3.468e+11 |          | A    |
| $7d^2D_{3/2}$ | $5p^2P_{3/2}$ | 22.39           |                | 5.255e-02  |                | 3.874e-03 | 3.888e-03  | 1.748e+11 |          | A+   |
| $7d^2D_{3/2}$ | $6p^2P_{3/2}$ | 58.42           |                | 1.896e-01  |                | 3.646e-02 | 3.646e-02  | 9.264e+10 |          | A+   |
| $7d^2D_{3/2}$ | $4f^2F_{5/2}$ | 11.18           |                | 5.018e-03  |                | 1.847e-04 | 1.953e-04  | 6.696e+10 |          | B+   |
| $7d^2D_{3/2}$ | $5f^2F_{5/2}$ | 24.15           |                | 3.710e-02  |                | 2.950e-03 | 3.013e-03  | 1.060e+11 |          | A    |
| $7d^2D_{3/2}$ | $6f^2F_{5/2}$ | 65.48           |                | 3.495e-01  |                | 7.534e-02 | 7.552e-02  | 1.359e+11 |          | A+   |
| $7d^2D_{5/2}$ | $3p^2P_{3/2}$ | 4.76            |                | 9.893e-02  |                | 1.552e-03 | 1.591e-03  | 4.847e+12 |          | A    |
| $7d^2D_{5/2}$ | $4p^2P_{3/2}$ | 10.40           |                | 1.988e-01  |                | 6.804e-03 | 6.849e-03  | 2.044e+12 |          | A+   |
| $7d^2D_{5/2}$ | $5p^2P_{3/2}$ | 22.33           |                | 4.553e-01  |                | 3.347e-02 | 3.358e-02  | 1.015e+12 |          | A+   |
| $7d^2D_{5/2}$ | $6p^2P_{3/2}$ | 57.98           |                | 1.595e+00  |                | 3.045e-01 | 3.045e-01  | 5.275e+11 |          | A+   |
| $7d^2D_{5/2}$ | $7p^2P_{3/2}$ | 1264.22         |                | 1.441e+00  |                | 6.000e+00 | 5.999e+00  | 1.003e+09 |          | D+   |
| $7d^2D_{5/2}$ | $4f^2F_{5/2}$ | 11.16           |                | 3.246e-04  |                | 1.193e-05 | 1.263e-05  | 2.896e+09 |          | C+   |
| $7d^2D_{5/2}$ | $5f^2F_{5/2}$ | 24.08           |                | 2.414e-03  |                | 1.913e-04 | 1.956e-04  | 4.628e+09 |          | B+   |
| $7d^2D_{5/2}$ | $6f^2F_{5/2}$ | 64.94           |                | 2.259e-02  |                | 4.830e-03 | 4.843e-03  | 5.956e+09 |          | A+   |
| $7d^2D_{5/2}$ | $4f^2F_{7/2}$ | 11.20           |                | 6.767e-03  |                | 2.495e-04 | 2.628e-04  | 5.998e+10 |          | B+   |
| $7d^2D_{5/2}$ | $5f^2F_{7/2}$ | 24.17           |                | 5.028e-02  |                | 4.000e-03 | 4.082e-03  | 9.572e+10 |          | A    |
| $7d^2D_{5/2}$ | $6f^2F_{7/2}$ | 65.30           |                | 4.722e-01  |                | 1.015e-01 | 1.018e-01  | 1.231e+11 |          | A+   |
| $7f^2F_{5/2}$ | $3d^2D_{3/2}$ | 5.00            |                | 1.078e-01  |                | 1.773e-03 | 1.884e-03  | 4.795e+12 |          | B+   |
| $7f^2F_{5/2}$ | $4d^2D_{3/2}$ | 10.79           |                | 2.910e-01  |                | 1.034e-02 | 1.050e-02  | 2.778e+12 |          | A+   |
| $7f^2F_{5/2}$ | $5d^2D_{3/2}$ | 23.12           |                | 7.393e-01  |                | 5.628e-02 | 5.664e-02  | 1.537e+12 |          | A+   |
| $7f^2F_{5/2}$ | $6d^2D_{3/2}$ | 60.48           |                | 2.778e+00  |                | 5.531e-01 | 5.537e-01  | 8.443e+11 |          | A+   |
| $7f^2F_{5/2}$ | $3d^2D_{5/2}$ | 5.04            |                | 7.488e-03  |                | 1.242e-04 | 1.313e-04  | 3.281e+11 |          | B+   |
| $7f^2F_{5/2}$ | $4d^2D_{5/2}$ | 10.87           |                | 2.066e-02  |                | 7.393e-04 | 7.501e-04  | 1.943e+11 |          | A    |
| $7f^2F_{5/2}$ | $5d^2D_{5/2}$ | 23.31           |                | 5.365e-02  |                | 4.117e-03 | 4.141e-03  | 1.098e+11 |          | A+   |
| $7f^2F_{5/2}$ | $6d^2D_{5/2}$ | 61.23           |                | 2.083e-01  |                | 4.199e-02 | 4.203e-02  | 6.177e+10 |          | A+   |
| $7f^2F_{5/2}$ | $5g^2G_{7/2}$ | 24.04           |                | 1.028e-02  |                | 8.136e-04 | 8.299e-04  | 1.977e+10 |          | A    |

Table S3 – continued from previous page

| Upper level     | Lower level     | $\lambda$ [RCI] | $\lambda$ Ref. | $gf$ [RCI] | $gf$ Ref. [24] | $S$ [RCI] | $S$ [MBPT] | $A$ [RCI] | $A$ Ref. | Unc. |
|-----------------|-----------------|-----------------|----------------|------------|----------------|-----------|------------|-----------|----------|------|
| $7f^2 F_{5/2}$  | $6g^2 G_{7/2}$  | 64.19           |                | 1.723e-01  |                | 3.641e-02 | 3.637e-02  | 4.648e+10 |          | A+   |
| $7f^2 F_{7/2}$  | $3d^2 D_{5/2}$  | 5.04            |                | 1.525e-01  |                | 2.528e-03 | 2.675e-03  | 5.013e+12 |          | B+   |
| $7f^2 F_{7/2}$  | $4d^2 D_{5/2}$  | 10.86           |                | 4.153e-01  |                | 1.486e-02 | 1.507e-02  | 2.934e+12 |          | A+   |
| $7f^2 F_{7/2}$  | $5d^2 D_{5/2}$  | 23.28           |                | 1.067e+00  |                | 8.178e-02 | 8.225e-02  | 1.642e+12 |          | A+   |
| $7f^2 F_{7/2}$  | $6d^2 D_{5/2}$  | 61.03           |                | 4.083e+00  |                | 8.203e-01 | 8.209e-01  | 9.140e+11 |          | A+   |
| $7f^2 F_{7/2}$  | $6g^2 G_{7/2}$  | 63.97           |                | 6.042e-03  |                | 1.273e-03 | 1.271e-03  | 1.231e+09 |          | A    |
| $7f^2 F_{7/2}$  | $5g^2 G_{9/2}$  | 24.06           |                | 1.304e-02  |                | 1.033e-03 | 1.053e-03  | 1.878e+10 |          | A    |
| $7f^2 F_{7/2}$  | $6g^2 G_{9/2}$  | 64.18           |                | 2.186e-01  |                | 4.619e-02 | 4.615e-02  | 4.425e+10 |          | A+   |
| $7g^2 G_{7/2}$  | $4f^2 F_{5/2}$  | 11.10           |                | 3.501e-01  |                | 1.280e-02 | 1.303e-02  | 2.367e+12 |          | A+   |
| $7g^2 G_{7/2}$  | $5f^2 F_{5/2}$  | 23.81           |                | 1.367e+00  |                | 1.071e-01 | 1.077e-01  | 2.011e+12 |          | A+   |
| $7g^2 G_{7/2}$  | $6f^2 F_{5/2}$  | 63.00           |                | 6.455e+00  |                | 1.339e+00 | 1.341e+00  | 1.356e+12 |          | A+   |
| $7g^2 G_{7/2}$  | $4f^2 F_{7/2}$  | 11.14           |                | 1.274e-02  |                | 4.672e-04 | 4.754e-04  | 8.557e+10 |          | B+   |
| $7g^2 G_{7/2}$  | $5f^2 F_{7/2}$  | 23.89           |                | 5.044e-02  |                | 3.967e-03 | 3.989e-03  | 7.367e+10 |          | A+   |
| $7g^2 G_{7/2}$  | $6f^2 F_{7/2}$  | 63.34           |                | 2.424e-01  |                | 5.054e-02 | 5.061e-02  | 5.036e+10 |          | A+   |
| $7g^2 G_{7/2}$  | $6h^2 H_{9/2}$  | 63.95           |                | 6.436e-02  |                | 1.355e-02 | 1.351e-02  | 1.312e+10 |          | A+   |
| $7g^2 G_{9/2}$  | $4f^2 F_{7/2}$  | 11.14           |                | 4.518e-01  |                | 1.656e-02 | 1.686e-02  | 2.430e+12 |          | A+   |
| $7g^2 G_{9/2}$  | $5f^2 F_{7/2}$  | 23.87           |                | 1.771e+00  |                | 1.392e-01 | 1.400e-01  | 2.073e+12 |          | A+   |
| $7g^2 G_{9/2}$  | $6f^2 F_{7/2}$  | 63.21           |                | 8.418e+00  |                | 1.752e+00 | 1.754e+00  | 1.405e+12 |          | A+   |
| $7g^2 G_{9/2}$  | $6h^2 H_{11/2}$ | 63.96           |                | 7.805e-02  |                | 1.644e-02 | 1.639e-02  | 1.273e+10 |          | A+   |
| $7h^2 H_{11/2}$ | $5g^2 G_{9/2}$  | 23.99           |                | 1.971e+00  |                | 1.557e-01 | 1.563e-01  | 1.904e+12 |          | A+   |
| $7h^2 H_{11/2}$ | $6g^2 G_{9/2}$  | 63.69           |                | 1.457e+01  |                | 3.054e+00 | 3.055e+00  | 1.996e+12 |          | A+   |
| $7h^2 H_{9/2}$  | $5g^2 G_{7/2}$  | 23.95           |                | 1.609e+00  |                | 1.269e-01 | 1.274e-01  | 1.870e+12 |          | A+   |
| $7h^2 H_{9/2}$  | $6g^2 G_{7/2}$  | 63.57           |                | 1.185e+01  |                | 2.479e+00 | 2.480e+00  | 1.955e+12 |          | A+   |
| $7h^2 H_{9/2}$  | $5g^2 G_{9/2}$  | 24.00           |                | 3.625e-02  |                | 2.865e-03 | 2.876e-03  | 4.197e+10 |          | A+   |
| $7h^2 H_{9/2}$  | $6g^2 G_{9/2}$  | 63.77           |                | 2.704e-01  |                | 5.677e-02 | 5.679e-02  | 4.434e+10 |          | A+   |
| $7i^2 I_{11/2}$ | $6h^2 H_{9/2}$  | 63.71           |                | 2.001e+01  |                | 4.196e+00 | 4.198e+00  | 2.740e+12 |          | A+   |
| $7i^2 I_{11/2}$ | $6h^2 H_{11/2}$ | 63.85           |                | 3.078e-01  |                | 6.471e-02 | 6.473e-02  | 4.197e+10 |          | A+   |
| $7i^2 I_{13/2}$ | $6h^2 H_{11/2}$ | 63.79           |                | 2.371e+01  |                | 4.980e+00 | 4.981e+00  | 2.777e+12 |          | A+   |
| $7p^2 P_{1/2}$  | $3s^2 S_{1/2}$  | 4.47            |                | 1.568e-02  |                | 2.308e-04 | 2.302e-04  | 2.616e+12 |          | B+   |
| $7p^2 P_{1/2}$  | $4s^2 S_{1/2}$  | 9.89            |                | 3.291e-02  |                | 1.072e-03 | 1.075e-03  | 1.121e+12 |          | A    |
| $7p^2 P_{1/2}$  | $5s^2 S_{1/2}$  | 21.46           |                | 8.137e-02  |                | 5.749e-03 | 5.761e-03  | 5.893e+11 |          | A+   |
| $7p^2 P_{1/2}$  | $6s^2 S_{1/2}$  | 56.41           |                | 3.181e-01  |                | 5.908e-02 | 5.892e-02  | 3.335e+11 |          | A+   |
| $7p^2 P_{1/2}$  | $3d^2 D_{3/2}$  | 5.04            |                | 3.207e-03  |                | 5.321e-05 | 4.774e-05  | 4.211e+11 |          | C+   |
| $7p^2 P_{1/2}$  | $4d^2 D_{3/2}$  | 10.99           |                | 1.523e-02  |                | 5.508e-04 | 5.455e-04  | 4.207e+11 |          | B+   |
| $7p^2 P_{1/2}$  | $5d^2 D_{3/2}$  | 24.04           |                | 6.698e-02  |                | 5.302e-03 | 5.311e-03  | 3.865e+11 |          | A+   |
| $7p^2 P_{1/2}$  | $6d^2 D_{3/2}$  | 67.20           |                | 5.005e-01  |                | 1.107e-01 | 1.106e-01  | 3.696e+11 |          | A+   |
| $7p^2 P_{3/2}$  | $3s^2 S_{1/2}$  | 4.46            |                | 2.723e-02  |                | 4.002e-04 | 3.958e-04  | 2.283e+12 |          | B+   |
| $7p^2 P_{3/2}$  | $4s^2 S_{1/2}$  | 9.85            |                | 5.481e-02  |                | 1.777e-03 | 1.776e-03  | 9.430e+11 |          | A+   |
| $7p^2 P_{3/2}$  | $5s^2 S_{1/2}$  | 21.23           |                | 1.291e-01  |                | 9.022e-03 | 9.030e-03  | 4.776e+11 |          | A+   |

Table S3 – continued from previous page

| Upper level   | Lower level   | $\lambda$ [RCI] | $\lambda$ Ref. | $gf$ [RCI] | $gf$ Ref. [24] | $S$ [RCI] | $S$ [MBPT] | $A$ [RCI] | $A$ Ref. | Unc. |
|---------------|---------------|-----------------|----------------|------------|----------------|-----------|------------|-----------|----------|------|
| $7p^2P_{3/2}$ | $6s^2S_{1/2}$ | 54.84           |                | 4.576e-01  |                | 8.263e-02 | 8.234e-02  | 2.537e+11 |          | A+   |
| $7p^2P_{3/2}$ | $7s^2S_{1/2}$ | 901.10          |                | 1.130e+00  |                | 3.352e+00 | 3.350e+00  | 2.320e+09 |          | C+   |
| $7p^2P_{3/2}$ | $3d^2D_{3/2}$ | 5.03            |                | 4.904e-04  |                | 8.116e-06 | 7.166e-06  | 3.236e+10 |          | C    |
| $7p^2P_{3/2}$ | $4d^2D_{3/2}$ | 10.93           |                | 2.365e-03  |                | 8.507e-05 | 8.410e-05  | 3.303e+10 |          | B    |
| $7p^2P_{3/2}$ | $5d^2D_{3/2}$ | 23.75           |                | 1.044e-02  |                | 8.161e-04 | 8.174e-04  | 3.085e+10 |          | A    |
| $7p^2P_{3/2}$ | $6d^2D_{3/2}$ | 64.99           |                | 7.451e-02  |                | 1.594e-02 | 1.592e-02  | 2.942e+10 |          | A+   |
| $7p^2P_{3/2}$ | $3d^2D_{5/2}$ | 5.07            |                | 4.729e-03  |                | 7.889e-05 | 6.872e-05  | 3.072e+11 |          | C+   |
| $7p^2P_{3/2}$ | $4d^2D_{5/2}$ | 11.01           |                | 2.286e-02  |                | 8.285e-04 | 8.133e-04  | 3.146e+11 |          | A    |
| $7p^2P_{3/2}$ | $5d^2D_{5/2}$ | 23.95           |                | 1.009e-01  |                | 7.957e-03 | 7.948e-03  | 2.934e+11 |          | A+   |
| $7p^2P_{3/2}$ | $6d^2D_{5/2}$ | 65.86           |                | 7.290e-01  |                | 1.581e-01 | 1.577e-01  | 2.802e+11 |          | A+   |
| $7s^2S_{1/2}$ | $3p^2P_{1/2}$ | 4.65            |                | 4.233e-03  |                | 6.482e-05 | 6.381e-05  | 6.524e+11 |          | B    |
| $7s^2S_{1/2}$ | $4p^2P_{1/2}$ | 10.30           |                | 1.322e-02  |                | 4.482e-04 | 4.534e-04  | 4.157e+11 |          | B+   |
| $7s^2S_{1/2}$ | $5p^2P_{1/2}$ | 22.57           |                | 4.587e-02  |                | 3.409e-03 | 3.441e-03  | 3.003e+11 |          | A+   |
| $7s^2S_{1/2}$ | $6p^2P_{1/2}$ | 61.90           |                | 2.721e-01  |                | 5.546e-02 | 5.564e-02  | 2.369e+11 |          | A+   |
| $7s^2S_{1/2}$ | $3p^2P_{3/2}$ | 4.81            |                | 1.058e-02  |                | 1.675e-04 | 1.639e-04  | 1.527e+12 |          | B+   |
| $7s^2S_{1/2}$ | $4p^2P_{3/2}$ | 10.61           |                | 3.278e-02  |                | 1.145e-03 | 1.150e-03  | 9.716e+11 |          | A    |
| $7s^2S_{1/2}$ | $5p^2P_{3/2}$ | 23.32           |                | 1.145e-01  |                | 8.787e-03 | 8.840e-03  | 7.021e+11 |          | A+   |
| $7s^2S_{1/2}$ | $6p^2P_{3/2}$ | 65.16           |                | 7.186e-01  |                | 1.542e-01 | 1.545e-01  | 5.644e+11 |          | A+   |
| $8d^2D_{3/2}$ | $3p^2P_{1/2}$ | 4.40            |                | 3.224e-02  |                | 4.673e-04 | 4.872e-04  | 2.773e+12 |          | B    |
| $8d^2D_{3/2}$ | $4p^2P_{1/2}$ | 9.15            |                | 5.680e-02  |                | 1.711e-03 | 1.748e-03  | 1.131e+12 |          | B+   |
| $8d^2D_{3/2}$ | $5p^2P_{1/2}$ | 17.71           |                | 1.043e-01  |                | 6.082e-03 | 6.166e-03  | 5.546e+11 |          | B+   |
| $8d^2D_{3/2}$ | $6p^2P_{1/2}$ | 35.32           |                | 2.260e-01  |                | 2.628e-02 | 2.652e-02  | 3.021e+11 |          | B+   |
| $8d^2D_{3/2}$ | $7p^2P_{1/2}$ | 86.54           |                | 7.328e-01  |                | 2.088e-01 | 2.088e-01  | 1.632e+11 |          | B+   |
| $8d^2D_{3/2}$ | $8p^2P_{1/2}$ | 1288.32         |                | 1.357e+00  |                | 5.756e+00 | 5.750e+00  | 1.363e+09 |          | D+   |
| $8d^2D_{3/2}$ | $3p^2P_{3/2}$ | 4.54            |                | 6.607e-03  |                | 9.879e-05 | 1.025e-04  | 5.341e+11 |          | C+   |
| $8d^2D_{3/2}$ | $4p^2P_{3/2}$ | 9.40            |                | 1.228e-02  |                | 3.798e-04 | 3.863e-04  | 2.320e+11 |          | B    |
| $8d^2D_{3/2}$ | $5p^2P_{3/2}$ | 18.17           |                | 2.367e-02  |                | 1.416e-03 | 1.430e-03  | 1.196e+11 |          | B+   |
| $8d^2D_{3/2}$ | $6p^2P_{3/2}$ | 36.36           |                | 5.431e-02  |                | 6.501e-03 | 6.547e-03  | 6.852e+10 |          | B+   |
| $8d^2D_{3/2}$ | $7p^2P_{3/2}$ | 90.50           |                | 1.962e-01  |                | 5.846e-02 | 5.840e-02  | 3.995e+10 |          | B+   |
| $8d^2D_{3/2}$ | $4f^2F_{5/2}$ | 10.02           |                | 2.415e-03  |                | 7.964e-05 | 9.127e-05  | 4.014e+10 |          | C+   |
| $8d^2D_{3/2}$ | $5f^2F_{5/2}$ | 19.31           |                | 1.354e-02  |                | 8.608e-04 | 9.149e-04  | 6.056e+10 |          | B+   |
| $8d^2D_{3/2}$ | $6f^2F_{5/2}$ | 38.97           |                | 6.620e-02  |                | 8.494e-03 | 8.720e-03  | 7.267e+10 |          | B+   |
| $8d^2D_{3/2}$ | $7f^2F_{5/2}$ | 101.00          |                | 5.126e-01  |                | 1.704e-01 | 1.707e-01  | 8.380e+10 |          | B+   |
| $8d^2D_{5/2}$ | $3p^2P_{3/2}$ | 4.54            |                | 5.948e-02  |                | 8.890e-04 | 9.209e-04  | 3.208e+12 |          | B+   |
| $8d^2D_{5/2}$ | $4p^2P_{3/2}$ | 9.39            |                | 1.088e-01  |                | 3.363e-03 | 3.414e-03  | 1.372e+12 |          | B+   |
| $8d^2D_{5/2}$ | $5p^2P_{3/2}$ | 18.14           |                | 2.069e-01  |                | 1.236e-02 | 1.247e-02  | 6.992e+11 |          | B+   |
| $8d^2D_{5/2}$ | $6p^2P_{3/2}$ | 36.24           |                | 4.678e-01  |                | 5.582e-02 | 5.618e-02  | 3.959e+11 |          | B+   |
| $8d^2D_{5/2}$ | $7p^2P_{3/2}$ | 89.80           |                | 1.644e+00  |                | 4.860e-01 | 4.854e-01  | 2.266e+11 |          | B+   |
| $8d^2D_{5/2}$ | $4f^2F_{5/2}$ | 10.01           |                | 1.562e-04  |                | 5.148e-06 | 5.924e-06  | 1.734e+09 |          | C    |

Table S3 – continued from previous page

| Upper level    | Lower level    | $\lambda$ [RCI] | $\lambda$ Ref. | $gf$ [RCI] | $gf$ Ref. [24] | $S$ [RCI] | $S$ [MBPT] | $A$ [RCI] | $A$ Ref. | Unc. |
|----------------|----------------|-----------------|----------------|------------|----------------|-----------|------------|-----------|----------|------|
| $8d^2 D_{5/2}$ | $5f^2 F_{5/2}$ | 19.28           |                | 8.827e-04  |                | 5.602e-05 | 5.969e-05  | 2.641e+09 |          | C+   |
| $8d^2 D_{5/2}$ | $6f^2 F_{5/2}$ | 38.84           |                | 4.332e-03  |                | 5.540e-04 | 5.693e-04  | 3.192e+09 |          | B    |
| $8d^2 D_{5/2}$ | $7f^2 F_{5/2}$ | 100.13          |                | 3.326e-02  |                | 1.096e-02 | 1.098e-02  | 3.688e+09 |          | B+   |
| $8d^2 D_{5/2}$ | $4f^2 F_{7/2}$ | 10.04           |                | 3.243e-03  |                | 1.072e-04 | 1.222e-04  | 3.579e+10 |          | C+   |
| $8d^2 D_{5/2}$ | $5f^2 F_{7/2}$ | 19.33           |                | 1.832e-02  |                | 1.166e-03 | 1.238e-03  | 5.448e+10 |          | B+   |
| $8d^2 D_{5/2}$ | $6f^2 F_{7/2}$ | 38.97           |                | 8.990e-02  |                | 1.154e-02 | 1.184e-02  | 6.580e+10 |          | B+   |
| $8d^2 D_{5/2}$ | $7f^2 F_{7/2}$ | 100.68          |                | 6.936e-01  |                | 2.299e-01 | 2.303e-01  | 7.608e+10 |          | B+   |
| $8f^2 F_{5/2}$ | $3d^2 D_{3/2}$ | 4.76            |                | 6.103e-02  |                | 9.554e-04 | 1.025e-03  | 3.001e+12 |          | B    |
| $8f^2 F_{5/2}$ | $4d^2 D_{3/2}$ | 9.72            |                | 1.500e-01  |                | 4.801e-03 | 4.912e-03  | 1.766e+12 |          | B+   |
| $8f^2 F_{5/2}$ | $5d^2 D_{3/2}$ | 18.70           |                | 3.150e-01  |                | 1.939e-02 | 1.963e-02  | 1.001e+12 |          | B+   |
| $8f^2 F_{5/2}$ | $6d^2 D_{3/2}$ | 37.37           |                | 7.462e-01  |                | 9.181e-02 | 9.252e-02  | 5.940e+11 |          | B+   |
| $8f^2 F_{5/2}$ | $7d^2 D_{3/2}$ | 93.37           |                | 2.749e+00  |                | 8.451e-01 | 8.453e-01  | 3.506e+11 |          | B    |
| $8f^2 F_{5/2}$ | $3d^2 D_{5/2}$ | 4.79            |                | 4.229e-03  |                | 6.671e-05 | 7.105e-05  | 2.049e+11 |          | C+   |
| $8f^2 F_{5/2}$ | $4d^2 D_{5/2}$ | 9.78            |                | 1.059e-02  |                | 3.411e-04 | 3.485e-04  | 1.230e+11 |          | B    |
| $8f^2 F_{5/2}$ | $5d^2 D_{5/2}$ | 18.82           |                | 2.262e-02  |                | 1.402e-03 | 1.417e-03  | 7.098e+10 |          | B+   |
| $8f^2 F_{5/2}$ | $6d^2 D_{5/2}$ | 37.66           |                | 5.459e-02  |                | 6.767e-03 | 6.815e-03  | 4.280e+10 |          | B+   |
| $8f^2 F_{5/2}$ | $7d^2 D_{5/2}$ | 94.50           |                | 2.073e-01  |                | 6.450e-02 | 6.449e-02  | 2.581e+10 |          | B+   |
| $8f^2 F_{5/2}$ | $5g^2 G_{7/2}$ | 19.30           |                | 3.415e-03  |                | 2.170e-04 | 2.301e-04  | 1.020e+10 |          | B    |
| $8f^2 F_{5/2}$ | $6g^2 G_{7/2}$ | 38.76           |                | 2.970e-02  |                | 3.790e-03 | 3.874e-03  | 2.199e+10 |          | B+   |
| $8f^2 F_{5/2}$ | $7g^2 G_{7/2}$ | 98.92           |                | 3.100e-01  |                | 1.010e-01 | 1.007e-01  | 3.522e+10 |          | B+   |
| $8f^2 F_{7/2}$ | $3d^2 D_{5/2}$ | 4.79            |                | 8.622e-02  |                | 1.360e-03 | 1.450e-03  | 3.133e+12 |          | B+   |
| $8f^2 F_{7/2}$ | $4d^2 D_{5/2}$ | 9.78            |                | 2.134e-01  |                | 6.872e-03 | 7.020e-03  | 1.861e+12 |          | B+   |
| $8f^2 F_{7/2}$ | $5d^2 D_{5/2}$ | 18.81           |                | 4.519e-01  |                | 2.799e-02 | 2.829e-02  | 1.065e+12 |          | B+   |
| $8f^2 F_{7/2}$ | $6d^2 D_{5/2}$ | 37.60           |                | 1.081e+00  |                | 1.339e-01 | 1.348e-01  | 6.376e+11 |          | B+   |
| $8f^2 F_{7/2}$ | $7d^2 D_{5/2}$ | 94.17           |                | 4.053e+00  |                | 1.257e+00 | 1.256e+00  | 3.810e+11 |          | B    |
| $8f^2 F_{7/2}$ | $7g^2 G_{7/2}$ | 98.57           |                | 1.091e-02  |                | 3.539e-03 | 3.529e-03  | 9.358e+08 |          | B+   |
| $8f^2 F_{7/2}$ | $5g^2 G_{9/2}$ | 19.32           |                | 4.328e-03  |                | 2.753e-04 | 2.917e-04  | 9.672e+09 |          | B    |
| $8f^2 F_{7/2}$ | $6g^2 G_{9/2}$ | 38.78           |                | 3.774e-02  |                | 4.818e-03 | 4.924e-03  | 2.092e+10 |          | B+   |
| $8f^2 F_{7/2}$ | $7g^2 G_{9/2}$ | 98.88           |                | 3.938e-01  |                | 1.282e-01 | 1.279e-01  | 3.358e+10 |          | B+   |
| $8g^2 G_{7/2}$ | $4f^2 F_{5/2}$ | 9.98            |                | 1.592e-01  |                | 5.230e-03 | 5.369e-03  | 1.334e+12 |          | B+   |
| $8g^2 G_{7/2}$ | $5f^2 F_{5/2}$ | 19.16           |                | 5.084e-01  |                | 3.207e-02 | 3.240e-02  | 1.155e+12 |          | B+   |
| $8g^2 G_{7/2}$ | $6f^2 F_{5/2}$ | 38.37           |                | 1.458e+00  |                | 1.842e-01 | 1.853e-01  | 8.258e+11 |          | B+   |
| $8g^2 G_{7/2}$ | $7f^2 F_{5/2}$ | 97.05           |                | 6.216e+00  |                | 1.986e+00 | 1.987e+00  | 5.502e+11 |          | B    |
| $8g^2 G_{7/2}$ | $4f^2 F_{7/2}$ | 10.00           |                | 5.773e-03  |                | 1.901e-04 | 1.951e-04  | 4.809e+10 |          | B    |
| $8g^2 G_{7/2}$ | $5f^2 F_{7/2}$ | 19.21           |                | 1.865e-02  |                | 1.180e-03 | 1.192e-03  | 4.212e+10 |          | B+   |
| $8g^2 G_{7/2}$ | $6f^2 F_{7/2}$ | 38.50           |                | 5.408e-02  |                | 6.855e-03 | 6.895e-03  | 3.042e+10 |          | B+   |
| $8g^2 G_{7/2}$ | $7f^2 F_{7/2}$ | 97.57           |                | 2.341e-01  |                | 7.518e-02 | 7.522e-02  | 2.050e+10 |          | B+   |
| $8g^2 G_{7/2}$ | $6h^2 H_{9/2}$ | 38.72           |                | 9.210e-03  |                | 1.174e-03 | 1.184e-03  | 5.121e+09 |          | B+   |
| $8g^2 G_{7/2}$ | $7h^2 H_{9/2}$ | 98.51           |                | 1.750e-01  |                | 5.677e-02 | 5.641e-02  | 1.504e+10 |          | B+   |

Table S3 – continued from previous page

| Upper level      | Lower level      | $\lambda$ [RCI] | $\lambda$ Ref. | $gf$ [RCI] | $gf$ Ref. [24] | $S$ [RCI] | $S$ [MBPT] | $A$ [RCI] | $A$ Ref. | Unc. |
|------------------|------------------|-----------------|----------------|------------|----------------|-----------|------------|-----------|----------|------|
| $8g\ ^2G_{9/2}$  | $4f\ ^2F_{7/2}$  | 10.00           |                | 2.052e-01  |                | 6.759e-03 | 6.936e-03  | 1.368e+12 |          | B+   |
| $8g\ ^2G_{9/2}$  | $5f\ ^2F_{7/2}$  | 19.21           |                | 6.574e-01  |                | 4.157e-02 | 4.200e-02  | 1.189e+12 |          | B+   |
| $8g\ ^2G_{9/2}$  | $6f\ ^2F_{7/2}$  | 38.47           |                | 1.893e+00  |                | 2.397e-01 | 2.411e-01  | 8.532e+11 |          | B+   |
| $8g\ ^2G_{9/2}$  | $7f\ ^2F_{7/2}$  | 97.36           |                | 8.115e+00  |                | 2.601e+00 | 2.602e+00  | 5.710e+11 |          | B    |
| $8g\ ^2G_{9/2}$  | $6h\ ^2H_{11/2}$ | 38.74           |                | 1.117e-02  |                | 1.425e-03 | 1.437e-03  | 4.965e+09 |          | B+   |
| $8g\ ^2G_{9/2}$  | $7h\ ^2H_{11/2}$ | 98.51           |                | 2.124e-01  |                | 6.890e-02 | 6.846e-02  | 1.460e+10 |          | B+   |
| $8h\ ^2H_{11/2}$ | $5g\ ^2G_{9/2}$  | 19.29           |                | 5.845e-01  |                | 3.712e-02 | 3.734e-02  | 8.735e+11 |          | B+   |
| $8h\ ^2H_{11/2}$ | $6g\ ^2G_{9/2}$  | 38.65           |                | 2.602e+00  |                | 3.311e-01 | 3.320e-01  | 9.678e+11 |          | B+   |
| $8h\ ^2H_{11/2}$ | $7g\ ^2G_{9/2}$  | 98.09           |                | 1.357e+01  |                | 4.384e+00 | 4.380e+00  | 7.843e+11 |          | B    |
| $8h\ ^2H_{11/2}$ | $7i\ ^2I_{13/2}$ | 98.49           |                | 7.836e-02  |                | 2.541e-02 | 2.524e-02  | 4.490e+09 |          | B+   |
| $8h\ ^2H_{9/2}$  | $5g\ ^2G_{7/2}$  | 19.26           |                | 4.776e-01  |                | 3.028e-02 | 3.046e-02  | 8.588e+11 |          | B+   |
| $8h\ ^2H_{9/2}$  | $6g\ ^2G_{7/2}$  | 38.60           |                | 2.121e+00  |                | 2.695e-01 | 2.703e-01  | 9.496e+11 |          | B+   |
| $8h\ ^2H_{9/2}$  | $7g\ ^2G_{7/2}$  | 97.92           |                | 1.103e+01  |                | 3.557e+00 | 3.554e+00  | 7.675e+11 |          | B    |
| $8h\ ^2H_{9/2}$  | $5g\ ^2G_{9/2}$  | 19.29           |                | 1.071e-02  |                | 6.806e-04 | 6.846e-04  | 1.920e+10 |          | B+   |
| $8h\ ^2H_{9/2}$  | $6g\ ^2G_{9/2}$  | 38.68           |                | 4.801e-02  |                | 6.113e-03 | 6.130e-03  | 2.141e+10 |          | B+   |
| $8h\ ^2H_{9/2}$  | $7g\ ^2G_{9/2}$  | 98.23           |                | 2.524e-01  |                | 8.163e-02 | 8.158e-02  | 1.745e+10 |          | B+   |
| $8h\ ^2H_{9/2}$  | $7i\ ^2I_{11/2}$ | 98.48           |                | 6.662e-02  |                | 2.160e-02 | 2.145e-02  | 4.581e+09 |          | B+   |
| $8i\ ^2I_{11/2}$ | $6h\ ^2H_{9/2}$  | 38.66           |                | 2.165e+00  |                | 2.756e-01 | 2.762e-01  | 8.050e+11 |          | B+   |
| $8i\ ^2I_{11/2}$ | $7h\ ^2H_{9/2}$  | 98.13           |                | 1.798e+01  |                | 5.808e+00 | 5.804e+00  | 1.038e+12 |          | C+   |
| $8i\ ^2I_{11/2}$ | $6h\ ^2H_{11/2}$ | 38.71           |                | 3.309e-02  |                | 4.218e-03 | 4.227e-03  | 1.227e+10 |          | B+   |
| $8i\ ^2I_{11/2}$ | $7h\ ^2H_{11/2}$ | 98.33           |                | 2.772e-01  |                | 8.975e-02 | 8.970e-02  | 1.594e+10 |          | B+   |
| $8i\ ^2I_{13/2}$ | $6h\ ^2H_{11/2}$ | 38.70           |                | 2.562e+00  |                | 3.264e-01 | 3.271e-01  | 8.151e+11 |          | B+   |
| $8i\ ^2I_{13/2}$ | $7h\ ^2H_{11/2}$ | 98.24           |                | 2.132e+01  |                | 6.895e+00 | 6.890e+00  | 1.052e+12 |          | C+   |
| $8p\ ^2P_{1/2}$  | $3s\ ^2S_{1/2}$  | 4.27            |                | 9.587e-03  |                | 1.346e-04 | 1.351e-04  | 1.757e+12 |          | B    |
| $8p\ ^2P_{1/2}$  | $4s\ ^2S_{1/2}$  | 8.94            |                | 1.814e-02  |                | 5.341e-04 | 5.403e-04  | 7.570e+11 |          | B    |
| $8p\ ^2P_{1/2}$  | $5s\ ^2S_{1/2}$  | 17.43           |                | 3.670e-02  |                | 2.106e-03 | 2.127e-03  | 4.030e+11 |          | B+   |
| $8p\ ^2P_{1/2}$  | $6s\ ^2S_{1/2}$  | 35.08           |                | 8.925e-02  |                | 1.031e-02 | 1.038e-02  | 2.419e+11 |          | B+   |
| $8p\ ^2P_{1/2}$  | $7s\ ^2S_{1/2}$  | 87.85           |                | 3.473e-01  |                | 1.004e-01 | 1.001e-01  | 1.501e+11 |          | B+   |
| $8p\ ^2P_{1/2}$  | $3d\ ^2D_{3/2}$  | 4.78            |                | 1.869e-03  |                | 2.942e-05 | 2.585e-05  | 2.729e+11 |          | C+   |
| $8p\ ^2P_{1/2}$  | $4d\ ^2D_{3/2}$  | 9.82            |                | 7.664e-03  |                | 2.479e-04 | 2.471e-04  | 2.649e+11 |          | B    |
| $8p\ ^2P_{1/2}$  | $5d\ ^2D_{3/2}$  | 19.09           |                | 2.563e-02  |                | 1.611e-03 | 1.625e-03  | 2.345e+11 |          | B+   |
| $8p\ ^2P_{1/2}$  | $6d\ ^2D_{3/2}$  | 38.97           |                | 9.597e-02  |                | 1.231e-02 | 1.241e-02  | 2.107e+11 |          | B+   |
| $8p\ ^2P_{1/2}$  | $7d\ ^2D_{3/2}$  | 104.05          |                | 6.531e-01  |                | 2.237e-01 | 2.233e-01  | 2.012e+11 |          | B+   |
| $8p\ ^2P_{3/2}$  | $3s\ ^2S_{1/2}$  | 4.26            |                | 1.682e-02  |                | 2.358e-04 | 2.344e-04  | 1.545e+12 |          | B    |
| $8p\ ^2P_{3/2}$  | $4s\ ^2S_{1/2}$  | 8.91            |                | 3.071e-02  |                | 9.013e-04 | 9.089e-04  | 6.445e+11 |          | B+   |
| $8p\ ^2P_{3/2}$  | $5s\ ^2S_{1/2}$  | 17.33           |                | 6.010e-02  |                | 3.428e-03 | 3.459e-03  | 3.338e+11 |          | B+   |
| $8p\ ^2P_{3/2}$  | $6s\ ^2S_{1/2}$  | 34.67           |                | 1.398e-01  |                | 1.596e-02 | 1.606e-02  | 1.940e+11 |          | B+   |
| $8p\ ^2P_{3/2}$  | $7s\ ^2S_{1/2}$  | 85.32           |                | 4.949e-01  |                | 1.390e-01 | 1.384e-01  | 1.134e+11 |          | B+   |
| $8p\ ^2P_{3/2}$  | $8s\ ^2S_{1/2}$  | 1355.11         |                | 1.299e+00  |                | 5.794e+00 | 5.788e+00  | 1.179e+09 |          | D+   |

Table S3 – continued from previous page

| Upper level   | Lower level   | $\lambda$ [RCI] | $\lambda$ Ref. | $gf$ [RCI] | $gf$ Ref. [24] | $S$ [RCI] | $S$ [MBPT] | $A$ [RCI] | $A$ Ref. | Unc. |
|---------------|---------------|-----------------|----------------|------------|----------------|-----------|------------|-----------|----------|------|
| $8p^2P_{3/2}$ | $3d^2D_{3/2}$ | 4.77            |                | 2.868e-04  |                | 4.506e-06 | 3.870e-06  | 2.100e+10 |          | C    |
| $8p^2P_{3/2}$ | $4d^2D_{3/2}$ | 9.79            |                | 1.197e-03  |                | 3.858e-05 | 3.841e-05  | 2.082e+10 |          | C+   |
| $8p^2P_{3/2}$ | $5d^2D_{3/2}$ | 18.97           |                | 4.052e-03  |                | 2.531e-04 | 2.554e-04  | 1.878e+10 |          | B    |
| $8p^2P_{3/2}$ | $6d^2D_{3/2}$ | 38.47           |                | 1.514e-02  |                | 1.918e-03 | 1.933e-03  | 1.706e+10 |          | B+   |
| $8p^2P_{3/2}$ | $7d^2D_{3/2}$ | 100.53          |                | 9.800e-02  |                | 3.244e-02 | 3.236e-02  | 1.617e+10 |          | B+   |
| $8p^2P_{3/2}$ | $3d^2D_{5/2}$ | 4.81            |                | 2.761e-03  |                | 4.370e-05 | 3.646e-05  | 1.991e+11 |          | C    |
| $8p^2P_{3/2}$ | $4d^2D_{5/2}$ | 9.86            |                | 1.154e-02  |                | 3.746e-04 | 3.682e-04  | 1.981e+11 |          | B    |
| $8p^2P_{3/2}$ | $5d^2D_{5/2}$ | 19.10           |                | 3.902e-02  |                | 2.453e-03 | 2.458e-03  | 1.784e+11 |          | B+   |
| $8p^2P_{3/2}$ | $6d^2D_{5/2}$ | 38.77           |                | 1.458e-01  |                | 1.862e-02 | 1.871e-02  | 1.618e+11 |          | B+   |
| $8p^2P_{3/2}$ | $7d^2D_{5/2}$ | 101.84          |                | 9.563e-01  |                | 3.206e-01 | 3.196e-01  | 1.538e+11 |          | B+   |
| $8s^2S_{1/2}$ | $3p^2P_{1/2}$ | 4.43            |                | 2.533e-03  |                | 3.691e-05 | 3.727e-05  | 4.314e+11 |          | C+   |
| $8s^2S_{1/2}$ | $4p^2P_{1/2}$ | 9.25            |                | 6.930e-03  |                | 2.111e-04 | 2.188e-04  | 2.700e+11 |          | B    |
| $8s^2S_{1/2}$ | $5p^2P_{1/2}$ | 18.09           |                | 1.871e-02  |                | 1.114e-03 | 1.143e-03  | 1.907e+11 |          | B+   |
| $8s^2S_{1/2}$ | $6p^2P_{1/2}$ | 36.85           |                | 5.961e-02  |                | 7.232e-03 | 7.344e-03  | 1.464e+11 |          | B+   |
| $8s^2S_{1/2}$ | $7p^2P_{1/2}$ | 96.36           |                | 3.354e-01  |                | 1.064e-01 | 1.067e-01  | 1.205e+11 |          | B+   |
| $8s^2S_{1/2}$ | $3p^2P_{3/2}$ | 4.57            |                | 6.290e-03  |                | 9.455e-05 | 9.377e-05  | 1.006e+12 |          | C+   |
| $8s^2S_{1/2}$ | $4p^2P_{3/2}$ | 9.50            |                | 1.700e-02  |                | 5.318e-04 | 5.429e-04  | 6.283e+11 |          | B    |
| $8s^2S_{1/2}$ | $5p^2P_{3/2}$ | 18.56           |                | 4.572e-02  |                | 2.794e-03 | 2.841e-03  | 4.424e+11 |          | B+   |
| $8s^2S_{1/2}$ | $6p^2P_{3/2}$ | 37.98           |                | 1.473e-01  |                | 1.842e-02 | 1.862e-02  | 3.405e+11 |          | B+   |
| $8s^2S_{1/2}$ | $7p^2P_{3/2}$ | 101.29          |                | 8.805e-01  |                | 2.936e-01 | 2.940e-01  | 2.862e+11 |          | B+   |
| $9d^2D_{3/2}$ | $3p^2P_{1/2}$ | 4.27            |                | 2.117e-02  |                | 2.975e-04 | 3.140e-04  | 1.937e+12 |          | B    |
| $9d^2D_{3/2}$ | $4p^2P_{1/2}$ | 8.59            |                | 3.548e-02  |                | 1.004e-03 | 1.056e-03  | 8.011e+11 |          | B+   |
| $9d^2D_{3/2}$ | $5p^2P_{1/2}$ | 15.73           |                | 5.923e-02  |                | 3.068e-03 | 3.193e-03  | 3.991e+11 |          | B+   |
| $9d^2D_{3/2}$ | $6p^2P_{1/2}$ | 28.23           |                | 1.071e-01  |                | 9.954e-03 | 1.026e-02  | 2.240e+11 |          | B+   |
| $9d^2D_{3/2}$ | $7p^2P_{1/2}$ | 53.59           |                | 2.315e-01  |                | 4.084e-02 | 4.172e-02  | 1.344e+11 |          | B+   |
| $9d^2D_{3/2}$ | $8p^2P_{1/2}$ | 126.89          |                | 7.546e-01  |                | 3.152e-01 | 3.159e-01  | 7.815e+10 |          | B+   |
| $9d^2D_{3/2}$ | $9p^2P_{1/2}$ | 1846.22         |                | 1.539e+00  |                | 9.355e+00 | 9.323e+00  | 7.530e+08 |          | D+   |
| $9d^2D_{3/2}$ | $3p^2P_{3/2}$ | 4.40            |                | 4.310e-03  |                | 6.243e-05 | 6.532e-05  | 3.713e+11 |          | C+   |
| $9d^2D_{3/2}$ | $4p^2P_{3/2}$ | 8.81            |                | 7.571e-03  |                | 2.195e-04 | 2.278e-04  | 1.628e+11 |          | B    |
| $9d^2D_{3/2}$ | $5p^2P_{3/2}$ | 16.09           |                | 1.316e-02  |                | 6.969e-04 | 7.172e-04  | 8.474e+10 |          | B+   |
| $9d^2D_{3/2}$ | $6p^2P_{3/2}$ | 28.89           |                | 2.478e-02  |                | 2.357e-03 | 2.409e-03  | 4.950e+10 |          | B+   |
| $9d^2D_{3/2}$ | $7p^2P_{3/2}$ | 55.08           |                | 5.648e-02  |                | 1.024e-02 | 1.040e-02  | 3.104e+10 |          | B+   |
| $9d^2D_{3/2}$ | $8p^2P_{3/2}$ | 132.55          |                | 2.045e-01  |                | 8.924e-02 | 8.920e-02  | 1.941e+10 |          | B+   |
| $9d^2D_{3/2}$ | $4f^2F_{5/2}$ | 9.35            |                | 1.367e-03  |                | 4.209e-05 | 5.748e-05  | 2.608e+10 |          | D+   |
| $9d^2D_{3/2}$ | $5f^2F_{5/2}$ | 16.98           |                | 6.603e-03  |                | 3.691e-04 | 4.360e-04  | 3.819e+10 |          | C    |
| $9d^2D_{3/2}$ | $6f^2F_{5/2}$ | 30.52           |                | 2.457e-02  |                | 2.469e-03 | 2.698e-03  | 4.399e+10 |          | B    |
| $9d^2D_{3/2}$ | $7f^2F_{5/2}$ | 58.80           |                | 9.951e-02  |                | 1.926e-02 | 2.015e-02  | 4.799e+10 |          | B+   |
| $9d^2D_{3/2}$ | $8f^2F_{5/2}$ | 147.46          |                | 6.874e-01  |                | 3.337e-01 | 3.353e-01  | 5.272e+10 |          | B    |
| $9d^2D_{5/2}$ | $3p^2P_{3/2}$ | 4.40            |                | 3.890e-02  |                | 5.633e-04 | 5.876e-04  | 2.235e+12 |          | B    |

Table S3 – continued from previous page

| Upper level   | Lower level   | $\lambda$ [RCI] | $\lambda$ Ref. | $gf$ [RCI] | $gf$ Ref. [24] | $S$ [RCI] | $S$ [MBPT] | $A$ [RCI] | $A$ Ref. | Unc. |
|---------------|---------------|-----------------|----------------|------------|----------------|-----------|------------|-----------|----------|------|
| $9d^2D_{5/2}$ | $4p^2P_{3/2}$ | 8.80            |                | 6.733e-02  |                | 1.951e-03 | 2.019e-03  | 9.660e+11 |          | B+   |
| $9d^2D_{5/2}$ | $5p^2P_{3/2}$ | 16.07           |                | 1.157e-01  |                | 6.121e-03 | 6.287e-03  | 4.977e+11 |          | B+   |
| $9d^2D_{5/2}$ | $6p^2P_{3/2}$ | 28.84           |                | 2.155e-01  |                | 2.046e-02 | 2.088e-02  | 2.880e+11 |          | B+   |
| $9d^2D_{5/2}$ | $7p^2P_{3/2}$ | 54.90           |                | 4.846e-01  |                | 8.758e-02 | 8.886e-02  | 1.787e+11 |          | B+   |
| $9d^2D_{5/2}$ | $8p^2P_{3/2}$ | 131.50          |                | 1.708e+00  |                | 7.395e-01 | 7.385e-01  | 1.098e+11 |          | B    |
| $9d^2D_{5/2}$ | $4f^2F_{5/2}$ | 9.35            |                | 8.843e-05  |                | 2.721e-06 | 3.776e-06  | 1.126e+09 |          | D+   |
| $9d^2D_{5/2}$ | $5f^2F_{5/2}$ | 16.96           |                | 4.306e-04  |                | 2.404e-05 | 2.865e-05  | 1.664e+09 |          | C    |
| $9d^2D_{5/2}$ | $6f^2F_{5/2}$ | 30.47           |                | 1.612e-03  |                | 1.617e-04 | 1.774e-04  | 1.931e+09 |          | B    |
| $9d^2D_{5/2}$ | $7f^2F_{5/2}$ | 58.60           |                | 6.543e-03  |                | 1.262e-03 | 1.322e-03  | 2.118e+09 |          | B+   |
| $9d^2D_{5/2}$ | $8f^2F_{5/2}$ | 146.16          |                | 4.474e-02  |                | 2.153e-02 | 2.163e-02  | 2.328e+09 |          | B+   |
| $9d^2D_{5/2}$ | $4f^2F_{7/2}$ | 9.37            |                | 1.913e-03  |                | 5.902e-05 | 7.641e-05  | 2.422e+10 |          | D+   |
| $9d^2D_{5/2}$ | $5f^2F_{7/2}$ | 17.01           |                | 9.194e-03  |                | 5.147e-04 | 5.871e-04  | 3.534e+10 |          | C+   |
| $9d^2D_{5/2}$ | $6f^2F_{7/2}$ | 30.55           |                | 3.406e-02  |                | 3.425e-03 | 3.658e-03  | 4.058e+10 |          | B+   |
| $9d^2D_{5/2}$ | $7f^2F_{7/2}$ | 58.78           |                | 1.372e-01  |                | 2.655e-02 | 2.739e-02  | 4.414e+10 |          | B+   |
| $9d^2D_{5/2}$ | $8f^2F_{7/2}$ | 146.94          |                | 9.375e-01  |                | 4.536e-01 | 4.525e-01  | 4.827e+10 |          | B    |
| $9f^2F_{5/2}$ | $3d^2D_{3/2}$ | 4.60            |                | 3.827e-02  |                | 5.798e-04 | 6.302e-04  | 2.009e+12 |          | B    |
| $9f^2F_{5/2}$ | $4d^2D_{3/2}$ | 9.10            |                | 8.898e-02  |                | 2.666e-03 | 2.761e-03  | 1.195e+12 |          | B+   |
| $9f^2F_{5/2}$ | $5d^2D_{3/2}$ | 16.53           |                | 1.685e-01  |                | 9.174e-03 | 9.391e-03  | 6.854e+11 |          | B+   |
| $9f^2F_{5/2}$ | $6d^2D_{3/2}$ | 29.61           |                | 3.277e-01  |                | 3.195e-02 | 3.252e-02  | 4.153e+11 |          | B+   |
| $9f^2F_{5/2}$ | $7d^2D_{3/2}$ | 56.44           |                | 7.554e-01  |                | 1.404e-01 | 1.423e-01  | 2.636e+11 |          | B+   |
| $9f^2F_{5/2}$ | $8d^2D_{3/2}$ | 136.41          |                | 2.765e+00  |                | 1.242e+00 | 1.242e+00  | 1.652e+11 |          | B    |
| $9f^2F_{5/2}$ | $3d^2D_{5/2}$ | 4.63            |                | 2.648e-03  |                | 4.040e-05 | 4.356e-05  | 1.370e+11 |          | C+   |
| $9f^2F_{5/2}$ | $4d^2D_{5/2}$ | 9.16            |                | 6.259e-03  |                | 1.887e-04 | 1.945e-04  | 8.301e+10 |          | B    |
| $9f^2F_{5/2}$ | $5d^2D_{5/2}$ | 16.63           |                | 1.204e-02  |                | 6.591e-04 | 6.720e-04  | 4.840e+10 |          | B+   |
| $9f^2F_{5/2}$ | $6d^2D_{5/2}$ | 29.79           |                | 2.372e-02  |                | 2.327e-03 | 2.363e-03  | 2.971e+10 |          | B+   |
| $9f^2F_{5/2}$ | $7d^2D_{5/2}$ | 56.85           |                | 5.556e-02  |                | 1.040e-02 | 1.053e-02  | 1.911e+10 |          | B+   |
| $9f^2F_{5/2}$ | $8d^2D_{5/2}$ | 138.02          |                | 2.094e-01  |                | 9.515e-02 | 9.512e-02  | 1.222e+10 |          | B+   |
| $9f^2F_{5/2}$ | $5g^2G_{7/2}$ | 17.00           |                | 1.560e-03  |                | 8.728e-05 | 1.030e-04  | 6.000e+09 |          | C+   |
| $9f^2F_{5/2}$ | $6g^2G_{7/2}$ | 30.48           |                | 1.025e-02  |                | 1.029e-03 | 1.114e-03  | 1.227e+10 |          | B    |
| $9f^2F_{5/2}$ | $7g^2G_{7/2}$ | 58.42           |                | 5.630e-02  |                | 1.083e-02 | 1.125e-02  | 1.834e+10 |          | B+   |
| $9f^2F_{5/2}$ | $8g^2G_{7/2}$ | 144.33          |                | 4.697e-01  |                | 2.232e-01 | 2.230e-01  | 2.507e+10 |          | B+   |
| $9f^2F_{7/2}$ | $3d^2D_{5/2}$ | 4.63            |                | 5.519e-02  |                | 8.421e-04 | 8.895e-04  | 2.143e+12 |          | B+   |
| $9f^2F_{7/2}$ | $4d^2D_{5/2}$ | 9.15            |                | 1.114e-01  |                | 3.356e-03 | 3.923e-03  | 1.108e+12 |          | C+   |
| $9f^2F_{7/2}$ | $5d^2D_{5/2}$ | 16.62           |                | 1.796e-01  |                | 9.828e-03 | 1.345e-02  | 5.419e+11 |          | D+   |
| $9f^2F_{7/2}$ | $6d^2D_{5/2}$ | 29.77           |                | 4.267e-01  |                | 4.183e-02 | 4.696e-02  | 4.014e+11 |          | C+   |
| $9f^2F_{7/2}$ | $7d^2D_{5/2}$ | 56.77           |                | 1.027e+00  |                | 1.919e-01 | 2.077e-01  | 2.656e+11 |          | B    |
| $9f^2F_{7/2}$ | $8d^2D_{5/2}$ | 137.56          |                | 1.988e+00  |                | 9.002e-01 | 1.849e+00  | 8.757e+10 |          | E    |
| $9f^2F_{7/2}$ | $8g^2G_{7/2}$ | 143.83          |                | 1.839e-02  |                | 8.707e-03 | 7.831e-03  | 7.412e+08 |          | C+   |
| $9f^2F_{7/2}$ | $5g^2G_{9/2}$ | 17.02           |                | 3.111e-03  |                | 1.743e-04 | 1.302e-04  | 8.957e+09 |          | D+   |

Table S3 – continued from previous page

| Upper level     | Lower level     | $\lambda$ [RCI] | $\lambda$ Ref. | $gf$ [RCI] | $gf$ Ref. [24] | $S$ [RCI] | $S$ [MBPT] | $A$ [RCI] | $A$ Ref. | Unc. |
|-----------------|-----------------|-----------------|----------------|------------|----------------|-----------|------------|-----------|----------|------|
| $9f^2 F_{7/2}$  | $6g^2 G_{9/2}$  | 30.50           |                | 1.535e-02  |                | 1.541e-03 | 1.414e-03  | 1.375e+10 |          | B    |
| $9f^2 F_{7/2}$  | $7g^2 G_{9/2}$  | 58.45           |                | 7.188e-02  |                | 1.383e-02 | 1.431e-02  | 1.754e+10 |          | B+   |
| $9f^2 F_{7/2}$  | $8g^2 G_{9/2}$  | 144.27          |                | 6.603e-01  |                | 3.136e-01 | 2.832e-01  | 2.645e+10 |          | C+   |
| $9g^2 G_{7/2}$  | $4f^2 F_{5/2}$  | 9.33            |                | 8.729e-02  |                | 2.680e-03 | 2.794e-03  | 8.367e+11 |          | B+   |
| $9g^2 G_{7/2}$  | $5f^2 F_{5/2}$  | 16.90           |                | 2.502e-01  |                | 1.392e-02 | 1.423e-02  | 7.304e+11 |          | B+   |
| $9g^2 G_{7/2}$  | $6f^2 F_{5/2}$  | 30.26           |                | 5.831e-01  |                | 5.810e-02 | 5.895e-02  | 5.309e+11 |          | B+   |
| $9g^2 G_{7/2}$  | $7f^2 F_{5/2}$  | 57.84           |                | 1.501e+00  |                | 2.858e-01 | 2.889e-01  | 3.739e+11 |          | B+   |
| $9g^2 G_{7/2}$  | $8f^2 F_{5/2}$  | 141.57          |                | 6.116e+00  |                | 2.851e+00 | 2.852e+00  | 2.544e+11 |          | B    |
| $9g^2 G_{7/2}$  | $4f^2 F_{7/2}$  | 9.35            |                | 3.173e-03  |                | 9.769e-05 | 1.012e-04  | 3.025e+10 |          | C+   |
| $9g^2 G_{7/2}$  | $5f^2 F_{7/2}$  | 16.94           |                | 9.190e-03  |                | 5.126e-04 | 5.213e-04  | 2.670e+10 |          | B    |
| $9g^2 G_{7/2}$  | $6f^2 F_{7/2}$  | 30.34           |                | 2.159e-02  |                | 2.157e-03 | 2.179e-03  | 1.956e+10 |          | B+   |
| $9g^2 G_{7/2}$  | $7f^2 F_{7/2}$  | 58.02           |                | 5.601e-02  |                | 1.070e-02 | 1.078e-02  | 1.387e+10 |          | B+   |
| $9g^2 G_{7/2}$  | $8f^2 F_{7/2}$  | 142.30          |                | 2.313e-01  |                | 1.083e-01 | 1.082e-01  | 9.523e+09 |          | B+   |
| $9g^2 G_{7/2}$  | $6h^2 H_{9/2}$  | 30.48           |                | 2.839e-03  |                | 2.849e-04 | 2.929e-04  | 2.548e+09 |          | B    |
| $9g^2 G_{7/2}$  | $7h^2 H_{9/2}$  | 58.36           |                | 2.775e-02  |                | 5.332e-03 | 5.409e-03  | 6.795e+09 |          | B+   |
| $9g^2 G_{7/2}$  | $8h^2 H_{9/2}$  | 143.68          |                | 3.205e-01  |                | 1.516e-01 | 1.501e-01  | 1.294e+10 |          | B+   |
| $9g^2 G_{9/2}$  | $4f^2 F_{7/2}$  | 9.35            |                | 1.130e-01  |                | 3.478e-03 | 3.603e-03  | 8.620e+11 |          | B+   |
| $9g^2 G_{9/2}$  | $5f^2 F_{7/2}$  | 16.94           |                | 3.246e-01  |                | 1.810e-02 | 1.841e-02  | 7.548e+11 |          | B+   |
| $9g^2 G_{9/2}$  | $6f^2 F_{7/2}$  | 30.33           |                | 7.582e-01  |                | 7.570e-02 | 7.647e-02  | 5.499e+11 |          | B+   |
| $9g^2 G_{9/2}$  | $7f^2 F_{7/2}$  | 57.97           |                | 1.956e+00  |                | 3.733e-01 | 3.761e-01  | 3.881e+11 |          | B+   |
| $9g^2 G_{9/2}$  | $8f^2 F_{7/2}$  | 141.99          |                | 8.007e+00  |                | 3.743e+00 | 3.736e+00  | 2.649e+11 |          | B    |
| $9g^2 G_{9/2}$  | $6h^2 H_{11/2}$ | 30.50           |                | 3.443e-03  |                | 3.457e-04 | 3.553e-04  | 2.469e+09 |          | B    |
| $9g^2 G_{9/2}$  | $7h^2 H_{11/2}$ | 58.38           |                | 3.370e-02  |                | 6.477e-03 | 6.571e-03  | 6.596e+09 |          | B+   |
| $9g^2 G_{9/2}$  | $8h^2 H_{11/2}$ | 143.67          |                | 3.892e-01  |                | 1.841e-01 | 1.822e-01  | 1.258e+10 |          | B+   |
| $9h^2 H_{11/2}$ | $5g^2 G_{9/2}$  | 17.00           |                | 2.524e-01  |                | 1.413e-02 | 1.427e-02  | 4.855e+11 |          | B+   |
| $9h^2 H_{11/2}$ | $6g^2 G_{9/2}$  | 30.45           |                | 9.109e-01  |                | 9.131e-02 | 9.179e-02  | 5.462e+11 |          | B+   |
| $9h^2 H_{11/2}$ | $7g^2 G_{9/2}$  | 58.25           |                | 2.848e+00  |                | 5.462e-01 | 5.486e-01  | 4.666e+11 |          | B+   |
| $9h^2 H_{11/2}$ | $8g^2 G_{9/2}$  | 143.04          |                | 1.302e+01  |                | 6.132e+00 | 6.118e+00  | 3.537e+11 |          | C+   |
| $9h^2 H_{11/2}$ | $7i^2 I_{13/2}$ | 58.39           |                | 1.018e-02  |                | 1.957e-03 | 1.967e-03  | 1.660e+09 |          | B+   |
| $9h^2 H_{11/2}$ | $8i^2 I_{13/2}$ | 143.63          |                | 2.160e-01  |                | 1.021e-01 | 1.008e-01  | 5.821e+09 |          | B+   |
| $9h^2 H_{9/2}$  | $5g^2 G_{7/2}$  | 16.98           |                | 2.064e-01  |                | 1.153e-02 | 1.165e-02  | 4.775e+11 |          | B+   |
| $9h^2 H_{9/2}$  | $6g^2 G_{7/2}$  | 30.41           |                | 7.435e-01  |                | 7.443e-02 | 7.483e-02  | 5.363e+11 |          | B+   |
| $9h^2 H_{9/2}$  | $7g^2 G_{7/2}$  | 58.17           |                | 2.320e+00  |                | 4.444e-01 | 4.464e-01  | 4.573e+11 |          | B+   |
| $9h^2 H_{9/2}$  | $8g^2 G_{7/2}$  | 142.81          |                | 1.058e+01  |                | 4.973e+00 | 4.962e+00  | 3.459e+11 |          | C+   |
| $9h^2 H_{9/2}$  | $5g^2 G_{9/2}$  | 17.00           |                | 4.618e-03  |                | 2.585e-04 | 2.612e-04  | 1.066e+10 |          | B    |
| $9h^2 H_{9/2}$  | $6g^2 G_{9/2}$  | 30.46           |                | 1.676e-02  |                | 1.681e-03 | 1.690e-03  | 1.205e+10 |          | B+   |
| $9h^2 H_{9/2}$  | $7g^2 G_{9/2}$  | 58.28           |                | 5.267e-02  |                | 1.011e-02 | 1.015e-02  | 1.034e+10 |          | B+   |
| $9h^2 H_{9/2}$  | $8g^2 G_{9/2}$  | 143.25          |                | 2.424e-01  |                | 1.143e-01 | 1.141e-01  | 7.881e+09 |          | B+   |
| $9h^2 H_{9/2}$  | $7i^2 I_{11/2}$ | 58.37           |                | 8.654e-03  |                | 1.663e-03 | 1.671e-03  | 1.694e+09 |          | B+   |

Table S3 – continued from previous page

| Upper level      | Lower level      | $\lambda$ [RCI] | $\lambda$ Ref. | $gf$ [RCI] | $gf$ Ref. [24] | $S$ [RCI] | $S$ [MBPT] | $A$ [RCI] | $A$ Ref. | Unc. |
|------------------|------------------|-----------------|----------------|------------|----------------|-----------|------------|-----------|----------|------|
| $9h\ ^2H_{9/2}$  | $8i\ ^2I_{11/2}$ | 143.62          |                | 1.836e-01  |                | 8.679e-02 | 8.568e-02  | 5.935e+09 |          | B+   |
| $9i\ ^2I_{11/2}$ | $6h\ ^2H_{9/2}$  | 30.45           |                | 5.968e-01  |                | 5.984e-02 | 5.999e-02  | 3.577e+11 |          | B+   |
| $9i\ ^2I_{11/2}$ | $7h\ ^2H_{9/2}$  | 58.26           |                | 2.973e+00  |                | 5.703e-01 | 5.719e-01  | 4.869e+11 |          | B+   |
| $9i\ ^2I_{11/2}$ | $8h\ ^2H_{9/2}$  | 143.10          |                | 1.676e+01  |                | 7.898e+00 | 7.881e+00  | 4.550e+11 |          | C+   |
| $9i\ ^2I_{11/2}$ | $6h\ ^2H_{11/2}$ | 30.48           |                | 9.094e-03  |                | 9.127e-04 | 9.150e-04  | 5.439e+09 |          | B+   |
| $9i\ ^2I_{11/2}$ | $7h\ ^2H_{11/2}$ | 58.33           |                | 4.557e-02  |                | 8.753e-03 | 8.778e-03  | 7.444e+09 |          | B+   |
| $9i\ ^2I_{11/2}$ | $8h\ ^2H_{11/2}$ | 143.40          |                | 2.589e-01  |                | 1.222e-01 | 1.220e-01  | 6.999e+09 |          | B+   |
| $9i\ ^2I_{13/2}$ | $6h\ ^2H_{11/2}$ | 30.48           |                | 7.058e-01  |                | 7.082e-02 | 7.100e-02  | 3.620e+11 |          | B+   |
| $9i\ ^2I_{13/2}$ | $7h\ ^2H_{11/2}$ | 58.31           |                | 3.520e+00  |                | 6.758e-01 | 6.777e-01  | 4.933e+11 |          | B    |
| $9i\ ^2I_{13/2}$ | $8h\ ^2H_{11/2}$ | 143.25          |                | 1.989e+01  |                | 9.379e+00 | 9.357e+00  | 4.617e+11 |          | C+   |
| $9p\ ^2P_{1/2}$  | $3s\ ^2S_{1/2}$  | 4.14            |                | 6.352e-03  |                | 8.649e-05 | 8.738e-05  | 1.238e+12 |          | C+   |
| $9p\ ^2P_{1/2}$  | $4s\ ^2S_{1/2}$  | 8.39            |                | 1.133e-02  |                | 3.130e-04 | 3.220e-04  | 5.368e+11 |          | B    |
| $9p\ ^2P_{1/2}$  | $5s\ ^2S_{1/2}$  | 15.45           |                | 2.052e-02  |                | 1.044e-03 | 1.074e-03  | 2.867e+11 |          | B+   |
| $9p\ ^2P_{1/2}$  | $6s\ ^2S_{1/2}$  | 27.90           |                | 4.054e-02  |                | 3.723e-03 | 3.810e-03  | 1.737e+11 |          | B+   |
| $9p\ ^2P_{1/2}$  | $7s\ ^2S_{1/2}$  | 53.41           |                | 9.746e-02  |                | 1.714e-02 | 1.743e-02  | 1.139e+11 |          | B+   |
| $9p\ ^2P_{1/2}$  | $8s\ ^2S_{1/2}$  | 129.19          |                | 3.778e-01  |                | 1.607e-01 | 1.603e-01  | 7.551e+10 |          | B+   |
| $9p\ ^2P_{1/2}$  | $3d\ ^2D_{3/2}$  | 4.62            |                | 1.200e-03  |                | 1.825e-05 | 1.586e-05  | 1.877e+11 |          | C+   |
| $9p\ ^2P_{1/2}$  | $4d\ ^2D_{3/2}$  | 9.16            |                | 4.504e-03  |                | 1.359e-04 | 1.377e-04  | 1.789e+11 |          | B    |
| $9p\ ^2P_{1/2}$  | $5d\ ^2D_{3/2}$  | 16.75           |                | 1.303e-02  |                | 7.186e-04 | 7.379e-04  | 1.550e+11 |          | B+   |
| $9p\ ^2P_{1/2}$  | $6d\ ^2D_{3/2}$  | 30.30           |                | 3.705e-02  |                | 3.697e-03 | 3.781e-03  | 1.346e+11 |          | B+   |
| $9p\ ^2P_{1/2}$  | $7d\ ^2D_{3/2}$  | 59.00           |                | 1.265e-01  |                | 2.457e-02 | 2.498e-02  | 1.212e+11 |          | B+   |
| $9p\ ^2P_{1/2}$  | $8d\ ^2D_{3/2}$  | 152.37          |                | 8.101e-01  |                | 4.064e-01 | 4.057e-01  | 1.164e+11 |          | B    |
| $9p\ ^2P_{3/2}$  | $3s\ ^2S_{1/2}$  | 4.13            |                | 1.121e-02  |                | 1.525e-04 | 1.525e-04  | 1.095e+12 |          | B    |
| $9p\ ^2P_{3/2}$  | $4s\ ^2S_{1/2}$  | 8.37            |                | 1.938e-02  |                | 5.342e-04 | 5.487e-04  | 4.608e+11 |          | B    |
| $9p\ ^2P_{3/2}$  | $5s\ ^2S_{1/2}$  | 15.40           |                | 3.418e-02  |                | 1.732e-03 | 1.782e-03  | 2.405e+11 |          | B+   |
| $9p\ ^2P_{3/2}$  | $6s\ ^2S_{1/2}$  | 27.71           |                | 6.558e-02  |                | 5.984e-03 | 6.130e-03  | 1.424e+11 |          | B+   |
| $9p\ ^2P_{3/2}$  | $7s\ ^2S_{1/2}$  | 52.75           |                | 1.513e-01  |                | 2.627e-02 | 2.673e-02  | 9.067e+10 |          | B+   |
| $9p\ ^2P_{3/2}$  | $8s\ ^2S_{1/2}$  | 125.38          |                | 5.345e-01  |                | 2.206e-01 | 2.199e-01  | 5.670e+10 |          | B+   |
| $9p\ ^2P_{3/2}$  | $9s\ ^2S_{1/2}$  | 1942.34         |                | 1.465e+00  |                | 9.368e+00 | 9.336e+00  | 6.475e+08 |          | D+   |
| $9p\ ^2P_{3/2}$  | $3d\ ^2D_{3/2}$  | 4.61            |                | 1.844e-04  |                | 2.800e-06 | 2.358e-06  | 1.445e+10 |          | C    |
| $9p\ ^2P_{3/2}$  | $4d\ ^2D_{3/2}$  | 9.14            |                | 7.051e-04  |                | 2.123e-05 | 2.155e-05  | 1.407e+10 |          | C+   |
| $9p\ ^2P_{3/2}$  | $5d\ ^2D_{3/2}$  | 16.68           |                | 2.073e-03  |                | 1.139e-04 | 1.172e-04  | 1.242e+10 |          | B    |
| $9p\ ^2P_{3/2}$  | $6d\ ^2D_{3/2}$  | 30.09           |                | 5.937e-03  |                | 5.881e-04 | 6.025e-04  | 1.093e+10 |          | B    |
| $9p\ ^2P_{3/2}$  | $7d\ ^2D_{3/2}$  | 58.19           |                | 2.015e-02  |                | 3.859e-03 | 3.926e-03  | 9.921e+09 |          | B+   |
| $9p\ ^2P_{3/2}$  | $8d\ ^2D_{3/2}$  | 147.10          |                | 1.223e-01  |                | 5.921e-02 | 5.909e-02  | 9.423e+09 |          | B+   |
| $9p\ ^2P_{3/2}$  | $3d\ ^2D_{5/2}$  | 4.65            |                | 1.772e-03  |                | 2.710e-05 | 2.189e-05  | 1.368e+11 |          | C    |
| $9p\ ^2P_{3/2}$  | $4d\ ^2D_{5/2}$  | 9.20            |                | 6.791e-03  |                | 2.057e-04 | 2.026e-04  | 1.338e+11 |          | B    |
| $9p\ ^2P_{3/2}$  | $5d\ ^2D_{5/2}$  | 16.78           |                | 1.993e-02  |                | 1.101e-03 | 1.111e-03  | 1.181e+11 |          | B+   |
| $9p\ ^2P_{3/2}$  | $6d\ ^2D_{5/2}$  | 30.27           |                | 5.689e-02  |                | 5.671e-03 | 5.754e-03  | 1.035e+11 |          | B+   |

Table S3 – continued from previous page

| Upper level     | Lower level     | $\lambda$ [RCI] | $\lambda$ Ref. | $gf$ [RCI] | $gf$ Ref. [24] | $S$ [RCI] | $S$ [MBPT] | $A$ [RCI] | $A$ Ref. | Unc. |
|-----------------|-----------------|-----------------|----------------|------------|----------------|-----------|------------|-----------|----------|------|
| $9p\ ^2P_{3/2}$ | $7d\ ^2D_{5/2}$ | 58.63           |                | 1.933e-01  |                | 3.731e-02 | 3.781e-02  | 9.380e+10 |          | B+   |
| $9p\ ^2P_{3/2}$ | $8d\ ^2D_{5/2}$ | 148.97          |                | 1.191e+00  |                | 5.841e-01 | 5.819e-01  | 8.949e+10 |          | B    |
| $9s\ ^2S_{1/2}$ | $3p\ ^2P_{1/2}$ | 4.28            |                | 1.650e-03  |                | 2.328e-05 | 2.385e-05  | 2.999e+11 |          | C+   |
| $9s\ ^2S_{1/2}$ | $4p\ ^2P_{1/2}$ | 8.65            |                | 4.192e-03  |                | 1.194e-04 | 1.304e-04  | 1.867e+11 |          | B    |
| $9s\ ^2S_{1/2}$ | $5p\ ^2P_{1/2}$ | 15.94           |                | 9.902e-03  |                | 5.196e-04 | 5.551e-04  | 1.300e+11 |          | B    |
| $9s\ ^2S_{1/2}$ | $6p\ ^2P_{1/2}$ | 28.90           |                | 2.445e-02  |                | 2.327e-03 | 2.431e-03  | 9.763e+10 |          | B+   |
| $9s\ ^2S_{1/2}$ | $7p\ ^2P_{1/2}$ | 56.06           |                | 7.371e-02  |                | 1.360e-02 | 1.399e-02  | 7.823e+10 |          | B+   |
| $9s\ ^2S_{1/2}$ | $8p\ ^2P_{1/2}$ | 141.65          |                | 3.996e-01  |                | 1.864e-01 | 1.873e-01  | 6.642e+10 |          | B+   |
| $9s\ ^2S_{1/2}$ | $3p\ ^2P_{3/2}$ | 4.42            |                | 4.080e-03  |                | 5.932e-05 | 5.915e-05  | 6.980e+11 |          | C+   |
| $9s\ ^2S_{1/2}$ | $4p\ ^2P_{3/2}$ | 8.87            |                | 1.020e-02  |                | 2.978e-04 | 3.137e-04  | 4.321e+11 |          | B    |
| $9s\ ^2S_{1/2}$ | $5p\ ^2P_{3/2}$ | 16.31           |                | 2.388e-02  |                | 1.282e-03 | 1.338e-03  | 2.996e+11 |          | B+   |
| $9s\ ^2S_{1/2}$ | $6p\ ^2P_{3/2}$ | 29.60           |                | 5.903e-02  |                | 5.752e-03 | 5.928e-03  | 2.248e+11 |          | B+   |
| $9s\ ^2S_{1/2}$ | $7p\ ^2P_{3/2}$ | 57.69           |                | 1.806e-01  |                | 3.431e-02 | 3.501e-02  | 1.810e+11 |          | B+   |
| $9s\ ^2S_{1/2}$ | $8p\ ^2P_{3/2}$ | 148.74          |                | 1.044e+00  |                | 5.111e-01 | 5.122e-01  | 1.573e+11 |          | B    |

Table S4: The present lifetimes ( $10^{-9}$  s) in length ( $\tau_l$ ) and velocity ( $\tau_v$ ) gauges for  $\text{Ar}^{7+}$ ,  $\text{Kr}^{25+}$  and  $\text{Xe}^{43+}$  along with the uncertainty percentage in the  $\tau_l$ .

| Level           | $\text{Ar}^{7+}$ |           |       | $\text{Kr}^{25+}$ |           |       | $\text{Xe}^{43+}$ |            |       |
|-----------------|------------------|-----------|-------|-------------------|-----------|-------|-------------------|------------|-------|
|                 | $\tau_l$         | $\tau_v$  | Unc.% | $\tau_l$          | $\tau_v$  | Unc.% | $\tau_l$          | $\tau_v$   | Unc.% |
| $3p\ ^2P_{1/2}$ | 4.154e-01        | 4.109e-01 | 5.24  | 8.723e-02         | 7.908e-02 | 2.45  | 4.270e-02         | 4.023e-02  | 1.86  |
| $3p\ ^2P_{3/2}$ | 3.911e-01        | 3.873e-01 | 5.22  | 4.604e-02         | 4.360e-02 | 2.48  | 6.354e-03         | 6.218e-03  | 1.82  |
| $3d\ ^2D_{3/2}$ | 1.331e-01        | 1.338e-01 | 4.19  | 2.696e-02         | 2.795e-02 | 2.45  | 5.795e-03         | 5.837e-03  | 1.98  |
| $3d\ ^2D_{5/2}$ | 1.374e-01        | 1.385e-01 | 4.89  | 3.673e-02         | 3.889e-02 | 2.66  | 1.540e-02         | 1.570e-02  | 1.82  |
| $4s\ ^2S_{1/2}$ | 2.964e-02        | 2.962e-02 | 4.66  | 5.433e-04         | 5.412e-04 | 1.65  | 7.366e-05         | 7.329e-05  | 1.19  |
| $4p\ ^2P_{1/2}$ | 5.127e-02        | 5.163e-02 | 5.89  | 5.220e-04         | 5.269e-04 | 1.80  | 6.24e-05          | 6.235e-05  | 1.3   |
| $4p\ ^2P_{3/2}$ | 5.233e-02        | 5.279e-02 | 4.93  | 5.737e-04         | 5.813e-04 | 1.62  | 7.798e-05         | 7.8795e-05 | 1.64  |
| $4d\ ^2D_{3/2}$ | 5.515e-02        | 5.503e-02 | 5.48  | 3.182e-04         | 3.184e-04 | 1.32  | 3.851e-05         | 3.836e-05  | 1.06  |
| $4d\ ^2D_{5/2}$ | 5.445e-02        | 5.426e-02 | 5.41  | 3.147e-04         | 3.164e-04 | 1.42  | 3.781e-05         | 3.767e-05  | 1.37  |
| $4f\ ^2F_{5/2}$ | 1.616e-02        | 1.613e-02 | 4.06  | 1.486e-04         | 1.477e-04 | 2.10  | 1.839e-05         | 1.833e-05  | 1.62  |
| $4f\ ^2F_{7/2}$ | 1.616e-02        | 1.614e-02 | 4.30  | 1.493e-04         | 1.483e-04 | 2.22  | 1.862e-05         | 1.858e-05  | 1.65  |
| $5s\ ^2S_{1/2}$ | 4.145e-02        | 4.138e-02 | 4.89  | 6.917e-04         | 6.882e-04 | 1.78  | 9.234e-05         | 9.199e-05  | 1.36  |
| $5p\ ^2P_{1/2}$ | 6.616e-02        | 6.621e-02 | 6.31  | 6.561e-04         | 6.593e-04 | 2.14  | 7.869e-05         | 7.861e-05  | 1.36  |
| $5p\ ^2P_{3/2}$ | 6.731e-02        | 6.761e-02 | 5.37  | 7.135e-04         | 7.214e-04 | 1.76  | 9.565e-05         | 9.558e-05  | 1.22  |
| $5d\ ^2D_{3/2}$ | 6.744e-02        | 6.723e-02 | 6.36  | 4.303e-04         | 4.299e-04 | 1.46  | 5.263e-05         | 5.242e-05  | 0.89  |
| $5d\ ^2D_{5/2}$ | 6.646e-02        | 6.613e-02 | 6.33  | 4.275e-04         | 4.325e-04 | 1.40  | 5.229e-05         | 5.209e-05  | 0.95  |
| $5f\ ^2F_{5/2}$ | 3.012e-02        | 2.998e-02 | 5.01  | 2.812e-04         | 2.798e-04 | 2.92  | 3.504e-05         | 3.491e-05  | 2.26  |

Table S4 – continued from previous page

| Level                             | Ar <sup>7+</sup> |           |       | Kr <sup>25+</sup> |           |       | Xe <sup>43+</sup> |           |       |
|-----------------------------------|------------------|-----------|-------|-------------------|-----------|-------|-------------------|-----------|-------|
|                                   | $\tau_l$         | $\tau_v$  | Unc.% | $\tau_l$          | $\tau_v$  | Unc.% | $\tau_l$          | $\tau_v$  | Unc.% |
| 5f <sup>2</sup> F <sub>7/2</sub>  | 3.009e-02        | 3.001e-02 | 5.20  | 2.829e-04         | 2.802e-04 | 3.20  | 3.550e-05         | 3.541e-05 | 2.29  |
| 5g <sup>2</sup> G <sub>7/2</sub>  | 5.719e-02        | 5.718e-02 | 3.13  | 5.125e-04         | 5.129e-04 | 1.54  | 6.234e-05         | 6.224e-05 | 1.07  |
| 5g <sup>2</sup> G <sub>9/2</sub>  | 5.720e-02        | 5.719e-02 | 3.24  | 5.138e-04         | 5.148e-04 | 1.60  | 6.269e-05         | 6.262e-05 | 0.94  |
| 6s <sup>2</sup> S <sub>1/2</sub>  | 6.324e-02        | 6.296e-02 | 5.19  | 9.934e-04         | 9.846e-04 | 2.13  | 1.31e-04          | 1.31e-04  | 1.57  |
| 6p <sup>2</sup> P <sub>1/2</sub>  | 9.661e-02        | 9.577e-02 | 6.70  | 9.362e-04         | 9.415e-04 | 2.53  | 1.121e-04         | 1.121e-04 | 1.74  |
| 6p <sup>2</sup> P <sub>3/2</sub>  | 9.785e-02        | 9.772e-02 | 5.75  | 1.014e-03         | 1.016e-03 | 1.99  | 1.342e-04         | 1.342e-04 | 1.46  |
| 6d <sup>2</sup> D <sub>3/2</sub>  | 9.577e-02        | 9.518e-02 | 7.55  | 6.366e-04         | 6.366e-04 | 1.75  | 7.821e-05         | 7.793e-05 | 1.05  |
| 6d <sup>2</sup> D <sub>5/2</sub>  | 9.372e-02        | 9.296e-02 | 7.51  | 6.270e-04         | 6.407e-04 | 1.59  | 7.814e-05         | 7.787e-05 | 1.11  |
| 6f <sup>2</sup> F <sub>5/2</sub>  | 5.099e-02        | 5.016e-02 | 7.06  | 4.761e-04         | 4.741e-04 | 3.39  | 5.952e-05         | 5.928e-05 | 2.6   |
| 6f <sup>2</sup> F <sub>7/2</sub>  | 5.050e-02        | 5.026e-02 | 6.69  | 4.802e-04         | 4.717e-04 | 4.09  | 6.034e-05         | 6.017e-05 | 2.6   |
| 6g <sup>2</sup> G <sub>7/2</sub>  | 9.801e-02        | 9.795e-02 | 3.22  | 8.777e-04         | 8.779e-04 | 1.24  | 1.068e-04         | 1.066e-04 | 0.87  |
| 6g <sup>2</sup> G <sub>9/2</sub>  | 9.802e-02        | 9.797e-02 | 3.24  | 8.801e-04         | 8.810e-04 | 1.29  | 1.074e-04         | 1.072e-04 | 0.92  |
| 6h <sup>2</sup> H <sub>9/2</sub>  | 1.484e-01        | 1.484e-01 | 5.35  | 1.329e-03         | 1.327e-03 | 2.15  | 1.618e-04         | 1.617e-04 | 1.03  |
| 6h <sup>2</sup> H <sub>11/2</sub> | 1.484e-01        | 1.484e-01 | 5.47  | 1.331e-03         | 1.327e-03 | 2.20  | 1.623e-04         | 1.622e-04 | 1.05  |
| 7s <sup>2</sup> S <sub>1/2</sub>  | 9.504e-02        | 9.418e-02 | 7.35  | 1.414e-03         | 1.394e-03 | 2.47  | 1.862e-04         | 1.859e-04 | 1.97  |
| 7p <sup>2</sup> P <sub>1/2</sub>  | 1.308e-01        | 1.392e-01 | 6.81  | 1.334e-03         | 1.327e-03 | 2.95  | 1.598e-04         | 1.599e-04 | 2.17  |
| 7p <sup>2</sup> P <sub>3/2</sub>  | 1.421e-01        | 1.414e-01 | 6.98  | 1.445e-03         | 1.443e-03 | 2.39  | 1.894e-04         | 1.896e-04 | 1.81  |
| 7d <sup>2</sup> D <sub>3/2</sub>  | 1.232e-01        | 1.305e-01 | 7.19  | 9.296e-04         | 9.237e-04 | 2.30  | 1.143e-04         | 1.140e-04 | 1.46  |
| 7d <sup>2</sup> D <sub>5/2</sub>  | 1.341e-01        | 1.321e-01 | 14.00 | 9.325e-04         | 9.217e-04 | 2.91  | 1.146e-04         | 1.142e-04 | 1.46  |
| 7f <sup>2</sup> F <sub>5/2</sub>  | 7.359e-02        | 7.797e-02 | 4.61  | 7.442e-04         | 7.423e-04 | 3.64  | 9.332e-05         | 9.292e-05 | 2.85  |
| 7f <sup>2</sup> F <sub>7/2</sub>  | 7.886e-02        | 7.814e-02 | 8.98  | 7.471e-04         | 7.395e-04 | 3.47  | 9.464e-05         | 9.434e-05 | 2.81  |
| 7g <sup>2</sup> G <sub>7/2</sub>  | 1.543e-01        | 1.540e-01 | 3.40  | 1.381e-03         | 1.375e-03 | 1.35  | 1.679e-04         | 1.675e-04 | 0.94  |
| 7g <sup>2</sup> G <sub>9/2</sub>  | 1.543e-01        | 1.541e-01 | 3.40  | 1.384e-03         | 1.385e-03 | 1.41  | 1.689e-04         | 1.686e-04 | 0.97  |
| 7h <sup>2</sup> H <sub>9/2</sub>  | 2.345e-01        | 2.344e-01 | 5.05  | 2.104e-03         | 2.095e-03 | 1.90  | 2.556e-04         | 2.553e-04 | 1.03  |
| 7h <sup>2</sup> H <sub>11/2</sub> | 2.345e-01        | 2.345e-01 | 5.14  | 2.103e-03         | 2.093e-03 | 1.94  | 2.564e-04         | 2.562e-04 | 1.05  |
| 7i <sup>2</sup> I <sub>11/2</sub> | 3.294e-01        | 3.295e-01 | 9.05  | 2.954e-03         | 2.955e-03 | 3.33  | 3.595e-04         | 3.593e-04 | 1.45  |
| 7i <sup>2</sup> I <sub>13/2</sub> | 3.295e-01        | 3.295e-01 | 9.22  | 2.955e-03         | 2.957e-03 | 3.39  | 3.601e-04         | 3.600e-04 | 1.48  |
| 8s <sup>2</sup> S <sub>1/2</sub>  |                  |           |       | 1.913e-03         | 1.907e-03 | 5.27  | 2.589e-04         | 2.590e-04 | 3.47  |
| 8p <sup>2</sup> P <sub>1/2</sub>  |                  |           |       | 1.862e-03         | 1.837e-03 | 6.45  | 2.226e-04         | 2.231e-04 | 4.12  |
| 8p <sup>2</sup> P <sub>3/2</sub>  |                  |           |       | 2.037e-03         | 1.994e-03 | 5.83  | 2.620e-04         | 2.628e-04 | 3.82  |
| 8d <sup>2</sup> D <sub>3/2</sub>  |                  |           |       | 1.295e-03         | 1.294e-03 | 6.02  | 1.619e-04         | 1.616e-04 | 3.62  |
| 8d <sup>2</sup> D <sub>5/2</sub>  |                  |           |       | 1.289e-03         | 1.311e-03 | 6.19  | 1.627e-04         | 1.623e-04 | 3.63  |
| 8f <sup>2</sup> F <sub>5/2</sub>  | 1.129e-01        | 1.196e-01 | 27.81 | 1.098e-03         | 1.091e-03 | 4.89  | 1.380e-04         | 1.373e-04 | 3.39  |
| 8f <sup>2</sup> F <sub>7/2</sub>  | 1.170e-01        | 1.149e-01 | 25.60 | 1.114e-03         | 1.097e-03 | 5.10  | 1.400e-04         | 1.395e-04 | 3.34  |
| 8g <sup>2</sup> G <sub>7/2</sub>  | 2.287e-01        | 2.278e-01 | 12.20 | 2.039e-03         | 2.041e-03 | 2.93  | 2.484e-04         | 2.478e-04 | 2.77  |
| 8g <sup>2</sup> G <sub>9/2</sub>  | 2.287e-01        | 2.279e-01 | 11.47 | 2.042e-03         | 2.052e-03 | 2.85  | 2.499e-04         | 2.494e-04 | 2.9   |
| 8h <sup>2</sup> H <sub>9/2</sub>  | 3.479e-01        | 3.476e-01 | 7.56  | 3.133e-03         | 3.094e-03 | 2.42  | 3.790e-04         | 3.784e-04 | 3.9   |
| 8h <sup>2</sup> H <sub>11/2</sub> | 3.480e-01        | 3.477e-01 | 7.35  | 3.118e-03         | 3.108e-03 | 2.40  | 3.802e-04         | 3.798e-04 | 4.11  |

Table S4 – continued from previous page

| Level            | $\text{Ar}^{7+}$ |           |       | $\text{Kr}^{25+}$ |           |       | $\text{Xe}^{43+}$ |           |       |
|------------------|------------------|-----------|-------|-------------------|-----------|-------|-------------------|-----------|-------|
|                  | $\tau_l$         | $\tau_v$  | Unc.% | $\tau_l$          | $\tau_v$  | Unc.% | $\tau_l$          | $\tau_v$  | Unc.% |
| $8i\ ^2I_{11/2}$ | 4.899e-01        | 4.899e-01 | 9.08  | 4.395e-03         | 4.386e-03 | 3.19  | 5.344e-04         | 5.341e-04 | 6.31  |
| $8i\ ^2I_{13/2}$ | 4.900e-01        | 4.900e-01 | 9.23  | 4.395e-03         | 4.393e-03 | 3.23  | 5.354e-04         | 5.352e-04 | 6.58  |
| $9s\ ^2S_{1/2}$  |                  |           |       | 2.552e-03         | 2.699e-03 | 5.94  | 3.507e-04         | 3.519e-04 | 3.63  |
| $9p\ ^2P_{1/2}$  |                  |           |       | 2.583e-03         | 2.557e-03 | 8.06  | 3.014e-04         | 3.032e-04 | 4.35  |
| $9p\ ^2P_{3/2}$  |                  |           |       | 2.706e-03         | 2.621e-03 | 6.54  | 3.530e-04         | 3.558e-04 | 4.04  |
| $9d\ ^2D_{3/2}$  |                  |           |       | 1.707e-03         | 1.770e-03 | 6.24  | 2.221e-04         | 2.223e-04 | 3.82  |
| $9d\ ^2D_{5/2}$  |                  |           |       | 1.558e-03         | 1.797e-03 | 8.27  | 2.233e-04         | 2.234e-04 | 3.79  |
| $9f\ ^2F_{5/2}$  | 1.905e-01        | 1.741e-01 | 33.24 | 1.544e-03         | 1.535e-03 | 5.27  | 1.951e-04         | 1.939e-04 | 3.75  |
| $9f\ ^2F_{7/2}$  | 1.701e-01        | 1.617e-01 | 29.08 | 1.661e-03         | 1.551e-03 | 13.32 | 2.163e-04         | 2.186e-04 | 7.05  |
| $9g\ ^2G_{7/2}$  | 3.254e-01        | 3.218e-01 | 13.96 | 2.846e-03         | 2.894e-03 | 3.13  | 3.510e-04         | 3.499e-04 | 2.53  |
| $9g\ ^2G_{9/2}$  | 3.254e-01        | 3.219e-01 | 13.18 | 2.876e-03         | 2.895e-03 | 3.06  | 3.519e-04         | 3.522e-04 | 2.62  |
| $9h\ ^2H_{9/2}$  | 4.928e-01        | 4.914e-01 | 8.60  | 4.461e-03         | 4.373e-03 | 2.54  | 5.360e-04         | 5.348e-04 | 3.2   |
| $9h\ ^2H_{11/2}$ | 4.928e-01        | 4.916e-01 | 8.31  | 4.404e-03         | 4.402e-03 | 2.51  | 5.377e-04         | 5.367e-04 | 3.35  |
| $9i\ ^2I_{11/2}$ | 6.950e-01        | 6.947e-01 | 9.15  | 6.224e-03         | 6.241e-03 | 3.17  | 7.578e-04         | 7.571e-04 | 4.81  |
| $9i\ ^2I_{13/2}$ | 6.950e-01        | 6.948e-01 | 9.21  | 6.232e-03         | 6.239e-03 | 3.20  | 7.593e-04         | 7.587e-04 | 5.01  |

Table S5: The present HFS constants  $A_J/\mu_I$  (MHz/units of  $\mu_I$ ),  $B_J/Q$  (MHz/b) and Landé  $g_J$  factors for  $\text{Ar}^{7+}$ ,  $\text{Kr}^{25+}$  and  $\text{Xe}^{43+}$ .

| Level           | $\text{Ar}^{7+}$ |           |          | $\text{Kr}^{25+}$ |           |          | $\text{Xe}^{43+}$ |           |          |
|-----------------|------------------|-----------|----------|-------------------|-----------|----------|-------------------|-----------|----------|
|                 | $A_J/\mu_I$      | $B_J/Q$   | $g_J$    | $A_J/\mu_I$       | $B_J/Q$   | $g_J$    | $A_J/\mu_I$       | $B_J/Q$   | $g_J$    |
| $3s\ ^2S_{1/2}$ | 5.638e+03        | 0.000     | 1.999547 | 7.246e+04         | 0.000     | 1.997032 | 1.045e+06         | 0.000     | 1.990910 |
| $3p\ ^2P_{1/2}$ | 1.529e+03        | 0.000     | 0.666249 | 2.216e+04         | 0.000     | 0.663247 | 3.317e+05         | 0.000     | 0.657639 |
| $3p\ ^2P_{3/2}$ | 3.020e+02        | 1.953e+03 | 1.332998 | 3.995e+03         | 3.403e+04 | 1.330819 | 5.000e+04         | 1.460e+05 | 1.326347 |
| $3d\ ^2D_{3/2}$ | 8.727e+01        | 1.827e+02 | 0.799752 | 1.882e+03         | 5.119e+03 | 0.797589 | 2.599e+04         | 2.458e+04 | 0.793362 |
| $3d\ ^2D_{5/2}$ | 9.692            | 2.603e+02 | 1.199764 | 6.263e+02         | 7.146e+03 | 1.198288 | 9.306e+03         | 3.263e+04 | 1.193665 |
| $4s\ ^2S_{1/2}$ | 1.988e+03        | 0.000     | 1.999785 | 2.859e+04         | 0.000     | 1.996213 | 4.212e+05         | 0.000     | 1.995108 |
| $4p\ ^2P_{1/2}$ | 5.640e+02        | 0.000     | 0.666465 | 8.814e+03         | 0.000     | 0.665369 | 1.349e+05         | 0.000     | 0.661820 |
| $4p\ ^2P_{3/2}$ | 1.111e+02        | 7.194e+02 | 1.333172 | 1.577e+03         | 1.343e+04 | 1.332430 | 2.049e+04         | 6.000e+04 | 1.329548 |
| $4d\ ^2D_{3/2}$ | 3.721e+01        | 7.661e+01 | 0.799867 | 7.703e+02         | 2.179e+03 | 0.798942 | 1.084e+04         | 1.061e+04 | 0.796358 |
| $4d\ ^2D_{5/2}$ | 6.419            | 1.093e+02 | 1.199872 | 2.926e+02         | 2.997e+03 | 1.199508 | 4.241e+03         | 1.396e+04 | 1.196504 |
| $4f\ ^2F_{5/2}$ | 7.464            | 4.696e+01 | 0.857032 | 1.923e+02         | 1.148e+03 | 0.855766 | 2.907e+03         | 4.979e+03 | 0.853788 |
| $4f\ ^2F_{7/2}$ | 3.586            | 5.475e+01 | 1.142748 | 1.078e+02         | 1.332e+03 | 1.141750 | 1.478e+03         | 5.706e+03 | 1.139554 |
| $5s\ ^2S_{1/2}$ | 9.242e+02        | 0.000     | 1.999875 | 1.424e+04         | 0.000     | 1.994794 | 2.099e+05         | 0.000     | 1.996949 |
| $5p\ ^2P_{1/2}$ | 2.693e+02        | 0.000     | 0.666547 | 4.397e+03         | 0.000     | 0.663286 | 6.767e+04         | 0.000     | 0.663642 |
| $5p\ ^2P_{3/2}$ | 5.307e+01        | 3.433e+02 | 1.333238 | 7.759e+02         | 6.607e+03 | 1.335247 | 1.033e+04         | 3.028e+04 | 1.330959 |
| $5d\ ^2D_{3/2}$ | 1.881e+01        | 3.879e+01 | 0.799918 | 3.893e+02         | 1.113e+03 | 0.798021 | 5.518e+03         | 5.457e+03 | 0.797697 |
| $5d\ ^2D_{5/2}$ | 3.810            | 5.551e+01 | 1.199921 | 1.512e+02         | 1.502e+03 | 1.199913 | 2.211e+03         | 7.154e+03 | 1.197786 |

Table S5 – continued from previous page

| Level                             | Ar <sup>7+</sup> |           |          | Kr <sup>23+</sup> |           |          | Xe <sup>43+</sup> |           |          |
|-----------------------------------|------------------|-----------|----------|-------------------|-----------|----------|-------------------|-----------|----------|
|                                   | $A_J/\mu_I$      | $B_J/Q$   | $g_J$    | $A_J/\mu_I$       | $B_J/Q$   | $g_J$    | $A_J/\mu_I$       | $B_J/Q$   | $g_J$    |
| 5f <sup>2</sup> F <sub>5/2</sub>  | 3.881            | 2.308e+01 | 0.857072 | 9.841e+01         | 5.710e+02 | 0.855561 | 1.503e+03         | 2.521e+03 | 0.854995 |
| 5f <sup>2</sup> F <sub>7/2</sub>  | 1.754            | 2.691e+01 | 1.142787 | 5.524e+01         | 6.618e+02 | 1.142248 | 7.556e+02         | 2.884e+03 | 1.140742 |
| 5g <sup>2</sup> G <sub>7/2</sub>  | 1.580            | 1.451e+01 | 0.888820 | 4.263e+01         | 3.258e+02 | 0.888118 | 6.193e+02         | 1.438e+03 | 0.886789 |
| 5g <sup>2</sup> G <sub>9/2</sub>  | 1.000            | 1.582e+01 | 1.111042 | 2.666e+01         | 3.528e+02 | 1.110779 | 3.883e+02         | 1.556e+03 | 1.109025 |
| 6s <sup>2</sup> S <sub>1/2</sub>  | 5.021e+02        | 0.000     | 1.999919 | 8.148e+03         | 0.000     | 1.993515 | 1.193e+05         | 0.000     | 1.997918 |
| 6p <sup>2</sup> P <sub>1/2</sub>  | 1.489e+02        | 0.000     | 0.666587 | 2.536e+03         | 0.000     | 0.675851 | 3.865e+04         | 0.000     | 0.664599 |
| 6p <sup>2</sup> P <sub>3/2</sub>  | 2.935e+01        | 1.897e+02 | 1.33271  | 4.501e+02         | 3.831e+03 | 1.331333 | 5.916e+03         | 1.736e+04 | 1.331705 |
| 6d <sup>2</sup> D <sub>3/2</sub>  | 1.067e+01        | 2.205e+01 | 0.799944 | 2.242e+02         | 6.444e+02 | 0.799417 | 3.181e+03         | 3.160e+03 | 0.798412 |
| 6d <sup>2</sup> D <sub>5/2</sub>  | 2.348            | 3.182e+01 | 1.199946 | 8.597e+01         | 8.472e+02 | 1.189457 | 1.288e+03         | 4.135e+03 | 1.198474 |
| 6f <sup>2</sup> F <sub>5/2</sub>  | 2.259            | 1.305e+01 | 0.857093 | 5.691e+01         | 3.254e+02 | 0.857994 | 8.727e+02         | 1.452e+03 | 0.855653 |
| 6f <sup>2</sup> F <sub>7/2</sub>  | 9.905e-01        | 1.522e+01 | 1.142809 | 3.204e+01         | 3.776e+02 | 1.142260 | 4.378e+02         | 1.660e+03 | 1.141389 |
| 6g <sup>2</sup> G <sub>7/2</sub>  | 9.146e-01        | 8.334     | 0.888841 | 2.478e+01         | 1.878e+02 | 0.889239 | 3.596e+02         | 8.300e+02 | 0.887430 |
| 6g <sup>2</sup> G <sub>9/2</sub>  | 5.769e-01        | 9.088     | 1.111063 | 1.535e+01         | 2.027e+02 | 1.110249 | 2.242e+02         | 8.976e+02 | 1.109662 |
| 6h <sup>2</sup> H <sub>9/2</sub>  | 4.749e-01        | 4.918     | 0.909043 | 1.272e+01         | 1.174e+02 | 0.907287 | 1.853e+02         | 4.945e+02 | 0.907643 |
| 6h <sup>2</sup> H <sub>11/2</sub> | 3.287e-01        | 5.201     | 1.090861 | 8.781             | 1.237e+02 | 1.090650 | 1.279e+02         | 5.208e+02 | 1.089466 |
| 7s <sup>2</sup> S <sub>1/2</sub>  | 3.017e+02        | 0.000     | 1.999945 | 5.133e+03         | 0.000     | 1.996592 | 7.418e+04         | 0.000     | 1.998491 |
| 7p <sup>2</sup> P <sub>1/2</sub>  | 9.062e+01        | 0.000     | 0.666607 | 1.605e+03         | 0.000     | 0.668601 | 2.412e+04         | 0.000     | 0.665163 |
| 7p <sup>2</sup> P <sub>3/2</sub>  | 1.787e+01        | 1.154e+02 | 1.333290 | 2.773e+02         | 2.360e+03 | 1.334734 | 3.700e+03         | 1.086e+04 | 1.332149 |
| 7d <sup>2</sup> D <sub>3/2</sub>  | 1.817            | 3.767     | 0.800009 | 1.446e+02         | 4.169e+02 | 0.804392 | 1.998e+03         | 1.989e+03 | 0.798839 |
| 7d <sup>2</sup> D <sub>5/2</sub>  | 1.524            | 1.983e+01 | 1.199962 | 5.892e+01         | 5.663e+02 | 1.203337 | 8.129e+02         | 2.600e+03 | 1.198885 |
| 7f <sup>2</sup> F <sub>5/2</sub>  | 1.425            | 8.092     | 0.857106 | 3.592e+01         | 2.037e+02 | 0.857888 | 5.503e+02         | 9.118e+02 | 0.856049 |
| 7f <sup>2</sup> F <sub>7/2</sub>  | 6.141e-01        | 9.434     | 1.142822 | 2.010e+01         | 2.350e+02 | 1.150023 | 2.760e+02         | 1.042e+03 | 1.141780 |
| 7g <sup>2</sup> G <sub>7/2</sub>  | 5.758e-01        | 5.220     | 0.888853 | 1.557e+01         | 1.171e+02 | 0.885718 | 2.269e+02         | 5.216e+02 | 0.887817 |
| 7g <sup>2</sup> G <sub>9/2</sub>  | 3.622e-01        | 5.692     | 1.111076 | 9.643             | 1.270e+02 | 1.110450 | 1.410e+02         | 5.638e+02 | 1.110047 |
| 7h <sup>2</sup> H <sub>9/2</sub>  | 2.990e-01        | 3.092     | 0.909056 | 7.992             | 7.366e+01 | 0.903819 | 1.168e+02         | 3.118e+02 | 0.908027 |
| 7h <sup>2</sup> H <sub>11/2</sub> | 2.069e-01        | 3.270     | 1.090874 | 5.538             | 7.796e+01 | 1.089796 | 8.057e+01         | 3.283e+02 | 1.089849 |
| 7i <sup>2</sup> I <sub>11/2</sub> | 1.750e-01        | 2.037     | 0.923042 | 4.681             | 4.527e+01 | 0.922408 | 6.819e+01         | 1.993e+02 | 0.922017 |
| 7i <sup>2</sup> I <sub>13/2</sub> | 1.283e-01        | 2.118     | 1.076888 | 3.429             | 4.701e+01 | 1.076027 | 4.993e+01         | 2.068e+02 | 1.075865 |
| 8s <sup>2</sup> S <sub>1/2</sub>  | 1.942e+02        | 0.000     | 1.999963 | 3.441e+03         | 0.000     | 2.004008 | 4.923e+04         | 0.000     | 1.998858 |
| 8p <sup>2</sup> P <sub>1/2</sub>  | 5.898e+01        | 0.000     | 0.666610 | 1.061e+03         | 0.000     | 0.660343 | 1.606e+04         | 0.000     | 0.665525 |
| 8p <sup>2</sup> P <sub>3/2</sub>  | 1.164e+01        | 7.514e+01 | 1.333301 | 1.901e+02         | 1.618e+03 | 1.319850 | 2.466e+03         | 7.240e+03 | 1.332432 |
| 8d <sup>2</sup> D <sub>3/2</sub>  | 2.344            | 4.858     | 0.799976 | 9.561e+01         | 2.758e+02 | 0.797919 | 1.335e+03         | 1.331e+03 | 0.799114 |
| 8d <sup>2</sup> D <sub>5/2</sub>  | 1.034            | 1.313e+01 | 1.199972 | 3.938e+01         | 3.769e+02 | 1.193549 | 5.452e+02         | 1.739e+03 | 1.199150 |
| 8f <sup>2</sup> F <sub>5/2</sub>  | 9.538e-01        | 5.356     | 0.857115 | 2.435e+01         | 1.371e+02 | 0.859304 | 3.688e+02         | 6.096e+02 | 0.856306 |
| 8f <sup>2</sup> F <sub>7/2</sub>  | 4.066e-01        | 6.244     | 1.142830 | 1.351e+01         | 1.571e+02 | 1.145408 | 1.849e+02         | 6.960e+02 | 1.142034 |
| 8g <sup>2</sup> G <sub>7/2</sub>  | 3.854e-01        | 3.482     | 0.888861 | 1.040e+01         | 7.802e+01 | 0.888774 | 1.521e+02         | 3.488e+02 | 0.888068 |
| 8g <sup>2</sup> G <sub>9/2</sub>  | 2.420e-01        | 3.796     | 1.111085 | 6.443             | 8.467e+01 | 1.114519 | 9.437e+01         | 3.770e+02 | 1.110297 |
| 8h <sup>2</sup> H <sub>9/2</sub>  | 2.003e-01        | 2.069     | 0.909064 | 5.313             | 4.875e+01 | 0.910014 | 7.829e+01         | 2.090e+02 | 0.908276 |

Table S5 – continued from previous page

| Level            | Ar <sup>7+</sup> |           |          | Kr <sup>25+</sup> |           |          | Xe <sup>43+</sup> |           |          |
|------------------|------------------|-----------|----------|-------------------|-----------|----------|-------------------|-----------|----------|
|                  | $A_J/\mu_I$      | $B_J/Q$   | $g_J$    | $A_J/\mu_I$       | $B_J/Q$   | $g_J$    | $A_J/\mu_I$       | $B_J/Q$   | $g_J$    |
| $8h\ ^2H_{11/2}$ | 1.386e-01        | 2.188     | 1.090882 | 3.708             | 5.222e+01 | 1.090302 | 5.399e+01         | 2.200e+02 | 1.090097 |
| $8i\ ^2I_{11/2}$ | 1.172e-01        | 1.364     | 0.923050 | 3.141             | 3.035e+01 | 0.922794 | 4.571e+01         | 1.337e+02 | 0.922265 |
| $8i\ ^2I_{13/2}$ | 8.595e-02        | 1.419     | 1.076896 | 2.299             | 3.159e+01 | 1.078134 | 3.347e+01         | 1.386e+02 | 1.076113 |
| $9s\ ^2S_{1/2}$  |                  |           |          | 2.261e+03         | 0.000     | 2.004870 | 3.436e+04         | 0.000     | 1.999107 |
| $9p\ ^2P_{1/2}$  | 4.021e+01        | 0.000     | 0.666622 | 7.156e+02         | 0.000     | 0.660166 | 1.124e+04         | 0.000     | 0.665778 |
| $9p\ ^2P_{3/2}$  | 7.936            | 5.123e+01 | 1.333305 | 1.381e+02         | 1.175e+03 | 1.345248 | 1.727e+03         | 5.070e+03 | 1.332622 |
| $9d\ ^2D_{3/2}$  | 3.199            | 6.624     | 0.799972 | 6.763e+01         | 1.953e+02 | 0.798072 | 9.366e+02         | 9.349e+02 | 0.799305 |
| $9d\ ^2D_{5/2}$  | 7.248e-01        | 9.051     | 1.199981 | 2.551e+01         | 2.477e+02 | 1.218808 | 3.835e+02         | 1.222e+03 | 1.199325 |
| $9f\ ^2F_{5/2}$  | 6.664e-01        | 3.715     | 0.857122 | 1.705e+01         | 9.576e+01 | 0.854057 | 2.589e+02         | 4.273e+02 | 0.856481 |
| $9f\ ^2F_{7/2}$  | 2.821e-01        | 4.331     | 1.142834 | 9.419             | 1.093e+02 | 1.149195 | 9.480e+01         | 3.556e+02 | 1.142333 |
| $9g\ ^2G_{7/2}$  | 2.701e-01        | 2.434     | 0.888866 | 7.213             | 5.404e+01 | 0.889472 | 1.069e+02         | 2.447e+02 | 0.888240 |
| $9g\ ^2G_{9/2}$  | 1.694e-01        | 2.654     | 1.111091 | 4.521             | 5.973e+01 | 1.111363 | 6.622e+01         | 2.644e+02 | 1.110468 |
| $9h\ ^2H_{9/2}$  | 1.406e-01        | 1.451     | 0.909069 | 3.747             | 3.437e+01 | 0.907951 | 5.500e+01         | 1.468e+02 | 0.908447 |
| $9h\ ^2H_{11/2}$ | 9.724e-02        | 1.535     | 1.090888 | 2.597             | 3.658e+01 | 1.089561 | 3.792e+01         | 1.545e+02 | 1.090268 |
| $9i\ ^2I_{11/2}$ | 8.233e-02        | 9.579e-01 | 0.923056 | 2.198             | 2.128e+01 | 0.920811 | 3.211e+01         | 9.394e+01 | 0.922435 |
| $9i\ ^2I_{13/2}$ | 6.036e-02        | 9.961e-01 | 1.076902 | 1.615             | 2.210e+01 | 1.078334 | 2.351e+01         | 9.743e+01 | 1.076283 |

Table S6: The present IS factors: NMS (a.u.), SMS (a.u.) and FS (GHz/fm<sup>2</sup>) for Ar<sup>7+</sup>, Kr<sup>25+</sup> and Xe<sup>43+</sup>.

| Level           | Ar <sup>7+</sup>  |                   |                  | Kr <sup>25+</sup> |                   |                  | Xe <sup>43+</sup> |                   |                  |
|-----------------|-------------------|-------------------|------------------|-------------------|-------------------|------------------|-------------------|-------------------|------------------|
|                 | NMS $\times 10^2$ | SMS $\times 10^1$ | FS $\times 10^2$ | NMS $\times 10^3$ | SMS $\times 10^2$ | FS $\times 10^3$ | NMS $\times 10^3$ | SMS $\times 10^3$ | FS $\times 10^4$ |
| $3s\ ^2S_{1/2}$ | 5.110340          | -8.726997         | 3.816144         | 2.336125          | -4.592932         | 8.567432         | 5.509865          | -1.077962         | 6.897243         |
| $3p\ ^2P_{1/2}$ | 5.104289          | -8.896910         | 3.791969         | 2.335552          | -4.778103         | 8.470826         | 5.506562          | -1.124390         | 6.801416         |
| $3p\ ^2P_{3/2}$ | 5.104203          | -8.896472         | 3.791927         | 2.335235          | -4.778202         | 8.469533         | 5.503670          | -1.124134         | 6.798417         |
| $3d\ ^2D_{3/2}$ | 5.094903          | -8.903392         | 3.792800         | 2.330677          | -4.834532         | 8.467691         | 5.498631          | -1.145729         | 6.798787         |
| $3d\ ^2D_{5/2}$ | 5.094956          | -8.904930         | 3.792802         | 2.330736          | -4.838297         | 8.467756         | 5.498248          | -1.147289         | 6.798918         |
| $4s\ ^2S_{1/2}$ | 5.084731          | -8.701174         | 3.801853         | 2.315861          | -4.563878         | 8.509358         | 5.454912          | -1.068776         | 6.839925         |
| $4p\ ^2P_{1/2}$ | 5.082372          | -8.771546         | 3.793224         | 2.315448          | -4.637863         | 8.470086         | 5.453485          | -1.086326         | 6.801384         |
| $4p\ ^2P_{3/2}$ | 5.082339          | -8.771683         | 3.793206         | 2.315245          | -4.638906         | 8.469552         | 5.452295          | -1.087485         | 6.800078         |
| $4d\ ^2D_{3/2}$ | 5.079007          | -8.772923         | 3.793501         | 2.313708          | -4.633426         | 8.470017         | 5.450397          | -1.087395         | 6.800235         |
| $4d\ ^2D_{5/2}$ | 5.079063          | -8.773426         | 3.793501         | 2.313662          | -4.632917         | 8.470053         | 5.450211          | -1.087175         | 6.800281         |
| $4f\ ^2F_{5/2}$ | 5.078534          | -8.703445         | 3.793885         | 2.313235          | -4.561297         | 8.469557         | 5.449332          | -1.066177         | 6.800958         |
| $4f\ ^2F_{7/2}$ | 5.078536          | -8.703457         | 3.793885         | 2.313236          | -4.561288         | 8.469558         | 5.449265          | -1.066190         | 6.800962         |
| $5s\ ^2S_{1/2}$ | 5.074376          | -8.700620         | 3.797673         | 2.306978          | -4.559210         | 8.490313         | 5.430383          | -1.067083         | 6.820456         |
| $5p\ ^2P_{1/2}$ | 5.073176          | -8.735068         | 3.793590         | 2.306686          | -4.597287         | 8.469827         | 5.429644          | -1.075560         | 6.801278         |
| $5p\ ^2P_{3/2}$ | 5.073160          | -8.735190         | 3.793581         | 2.306549          | -4.597690         | 8.469556         | 5.429041          | -1.076357         | 6.800604         |
| $5d\ ^2D_{3/2}$ | 5.071605          | -8.735161         | 3.793765         | 2.305900          | -4.589670         | 8.470715         | 5.428117          | -1.075103         | 6.800660         |

Table S6 – continued from previous page

| Level                             | Ar <sup>7+</sup>  |                   |                  | Kr <sup>25+</sup> |                   |                  | Xe <sup>43+</sup> |                   |                  |
|-----------------------------------|-------------------|-------------------|------------------|-------------------|-------------------|------------------|-------------------|-------------------|------------------|
|                                   | NMS $\times 10^2$ | SMS $\times 10^1$ | FS $\times 10^2$ | NMS $\times 10^3$ | SMS $\times 10^2$ | FS $\times 10^3$ | NMS $\times 10^3$ | SMS $\times 10^3$ | FS $\times 10^4$ |
| 5d <sup>2</sup> D <sub>5/2</sub>  | 5.071689          | -8.735466         | 3.793764         | 2.305845          | -4.588950         | 8.470741         | 5.428015          | -1.074924         | 6.800682         |
| 5f <sup>2</sup> F <sub>5/2</sub>  | 5.071327          | -8.702966         | 3.793894         | 2.305597          | -4.560773         | 8.469558         | 5.427564          | -1.066071         | 6.801011         |
| 5f <sup>2</sup> F <sub>7/2</sub>  | 5.071329          | -8.702971         | 3.793894         | 2.305596          | -4.560761         | 8.469558         | 5.427528          | -1.066075         | 6.801014         |
| 5g <sup>2</sup> G <sub>7/2</sub>  | 5.071473          | -8.703617         | 3.794033         | 2.305681          | -4.557610         | 8.471358         | 5.427507          | -1.066196         | 6.801058         |
| 5g <sup>2</sup> G <sub>9/2</sub>  | 5.071474          | -8.703617         | 3.794033         | 2.305663          | -4.557630         | 8.471358         | 5.427486          | -1.066209         | 6.801058         |
| 6s <sup>2</sup> S <sub>1/2</sub>  | 5.069156          | -8.701325         | 3.796012         | 2.302302          | -4.557951         | 8.482223         | 5.417346          | -1.066562         | 6.812094         |
| 6p <sup>2</sup> P <sub>1/2</sub>  | 5.068432          | -8.720556         | 3.793737         | 2.302079          | -4.581158         | 8.469716         | 5.416915          | -1.071296         | 6.801215         |
| 6p <sup>2</sup> P <sub>3/2</sub>  | 5.068423          | -8.720640         | 3.793732         | 2.302007          | -4.581548         | 8.469558         | 5.416564          | -1.071812         | 6.800825         |
| 6d <sup>2</sup> D <sub>3/2</sub>  | 5.067545          | -8.720410         | 3.793882         | 2.301675          | -4.574266         | 8.471000         | 5.416048          | -1.070818         | 6.800836         |
| 6d <sup>2</sup> D <sub>5/2</sub>  | 5.067658          | -8.720710         | 3.793880         | 2.301691          | -4.573658         | 8.471020         | 5.415986          | -1.070703         | 6.800849         |
| 6f <sup>2</sup> F <sub>5/2</sub>  | 5.067412          | -8.702958         | 3.793901         | 2.301446          | -4.560710         | 8.469558         | 5.415717          | -1.066066         | 6.801047         |
| 6f <sup>2</sup> F <sub>7/2</sub>  | 5.067412          | -8.702961         | 3.793901         | 2.301446          | -4.560701         | 8.469558         | 5.415695          | -1.066067         | 6.801049         |
| 6g <sup>2</sup> G <sub>7/2</sub>  | 5.067561          | -8.703481         | 3.794033         | 2.301550          | -4.557420         | 8.471360         | 5.415691          | -1.066163         | 6.801059         |
| 6g <sup>2</sup> G <sub>9/2</sub>  | 5.067561          | -8.703475         | 3.794033         | 2.301533          | -4.557428         | 8.471360         | 5.415679          | -1.066170         | 6.801059         |
| 6h <sup>2</sup> H <sub>9/2</sub>  | 5.067432          | -8.703311         | 3.793915         | 2.301414          | -4.560843         | 8.469559         | 5.415658          | -1.066097         | 6.801110         |
| 6h <sup>2</sup> H <sub>11/2</sub> | 5.067433          | -8.703314         | 3.793915         | 2.301409          | -4.560852         | 8.469559         | 5.415650          | -1.066103         | 6.801110         |
| 7s <sup>2</sup> S <sub>1/2</sub>  | 5.066153          | -8.701868         | 3.795223         | 2.299602          | -4.557502         | 8.478210         | 5.409601          | -1.066352         | 6.807924         |
| 7p <sup>2</sup> P <sub>1/2</sub>  | 5.065662          | -8.713632         | 3.793807         | 2.299383          | -4.573407         | 8.469660         | 5.409329          | -1.069261         | 6.801179         |
| 7p <sup>2</sup> P <sub>3/2</sub>  | 5.065657          | -8.713692         | 3.793804         | 2.299285          | -4.573407         | 8.469558         | 5.409104          | -1.069605         | 6.800933         |
| 7d <sup>2</sup> D <sub>3/2</sub>  | 5.061495          | -8.705827         | 3.794010         | 2.299156          | -4.567490         | 8.471136         | 5.408789          | -1.068903         | 6.800923         |
| 7d <sup>2</sup> D <sub>5/2</sub>  | 5.065243          | -8.713764         | 3.793939         | 2.299119          | -4.567288         | 8.471143         | 5.408746          | -1.068828         | 6.800930         |
| 7f <sup>2</sup> F <sub>5/2</sub>  | 5.065050          | -8.702998         | 3.793906         | 2.298946          | -4.560707         | 8.469558         | 5.408568          | -1.066069         | 6.801069         |
| 7f <sup>2</sup> F <sub>7/2</sub>  | 5.065050          | -8.703000         | 3.793906         | 2.298944          | -4.560703         | 8.469559         | 5.408553          | -1.066070         | 6.801070         |
| 7g <sup>2</sup> G <sub>7/2</sub>  | 5.065202          | -8.703386         | 3.794033         | 2.299047          | -4.557319         | 8.471361         | 5.408561          | -1.066146         | 6.801060         |
| 7g <sup>2</sup> G <sub>9/2</sub>  | 5.065202          | -8.703377         | 3.794033         | 2.299044          | -4.557323         | 8.471361         | 5.408553          | -1.066151         | 6.801060         |
| 7h <sup>2</sup> H <sub>9/2</sub>  | 5.065074          | -8.703283         | 3.793915         | 2.298914          | -4.560817         | 8.469559         | 5.408532          | -1.066094         | 6.801110         |
| 7h <sup>2</sup> H <sub>11/2</sub> | 5.065074          | -8.703285         | 3.793915         | 2.298921          | -4.560823         | 8.469559         | 5.408527          | -1.066097         | 6.801110         |
| 7i <sup>2</sup> I <sub>11/2</sub> | 5.065209          | -8.704152         | 3.794034         | 2.299044          | -4.557720         | 8.471367         | 5.408553          | -1.066229         | 6.801065         |
| 7i <sup>2</sup> I <sub>13/2</sub> | 5.065209          | -8.704152         | 3.794034         | 2.299043          | -4.557722         | 8.471367         | 5.408549          | -1.066230         | 6.801065         |
| 8s <sup>2</sup> S <sub>1/2</sub>  | 5.064251          | -8.702211         | 3.794799         | 2.297906          | -4.557301         | 8.475954         | 5.404631          | -1.066251         | 6.805618         |
| 8p <sup>2</sup> P <sub>1/2</sub>  | 5.063898          | -8.709898         | 3.793845         | 2.297654          | -4.569031         | 8.469625         | 5.404450          | -1.068163         | 6.801157         |
| 8p <sup>2</sup> P <sub>3/2</sub>  | 5.063897          | -8.709942         | 3.793843         | 2.297585          | -4.569282         | 8.469558         | 5.404293          | -1.068401         | 6.800993         |
| 8d <sup>2</sup> D <sub>3/2</sub>  | 5.061955          | -8.706607         | 3.794001         | 2.297535          | -4.563798         | 8.471214         | 5.404086          | -1.067910         | 6.800971         |
| 8d <sup>2</sup> D <sub>5/2</sub>  | 5.063672          | -8.710047         | 3.793971         | 2.297481          | -4.563656         | 8.471219         | 5.404056          | -1.067859         | 6.800976         |
| 8f <sup>2</sup> F <sub>5/2</sub>  | 5.063514          | -8.703026         | 3.793909         | 2.297332          | -4.560708         | 8.469558         | 5.403927          | -1.066072         | 6.801082         |
| 8f <sup>2</sup> F <sub>7/2</sub>  | 5.063515          | -8.703027         | 3.793909         | 2.297315          | -4.560706         | 8.469559         | 5.403912          | -1.066072         | 6.801083         |
| 8g <sup>2</sup> G <sub>7/2</sub>  | 5.063669          | -8.703308         | 3.794033         | 2.297427          | -4.557257         | 8.471363         | 5.403931          | -1.066137         | 6.801062         |
| 8g <sup>2</sup> G <sub>9/2</sub>  | 5.063670          | -8.703298         | 3.794033         | 2.297428          | -4.557259         | 8.471363         | 5.403925          | -1.066140         | 6.801062         |

Table S6 – continued from previous page

| Level            | Ar <sup>7+</sup>  |                   |                  | Kr <sup>25+</sup> |                   |                  | Xe <sup>43+</sup> |                   |                  |
|------------------|-------------------|-------------------|------------------|-------------------|-------------------|------------------|-------------------|-------------------|------------------|
|                  | NMS $\times 10^2$ | SMS $\times 10^1$ | FS $\times 10^2$ | NMS $\times 10^3$ | SMS $\times 10^2$ | FS $\times 10^3$ | NMS $\times 10^3$ | SMS $\times 10^3$ | FS $\times 10^4$ |
| $8h\ ^2H_{9/2}$  | 5.063543          | -8.703244         | 3.793915         | 2.297277          | -4.560797         | 8.469559         | 5.403905          | -1.066092         | 6.801110         |
| $8h\ ^2H_{11/2}$ | 5.063543          | -8.703245         | 3.793915         | 2.297305          | -4.560801         | 8.469559         | 5.403901          | -1.066094         | 6.801110         |
| $8i\ ^2I_{11/2}$ | 5.063678          | -8.703849         | 3.794034         | 2.297428          | -4.557534         | 8.471367         | 5.403927          | -1.066193         | 6.801065         |
| $8i\ ^2I_{13/2}$ | 5.063678          | -8.703849         | 3.794034         | 2.297431          | -4.557536         | 8.471367         | 5.403924          | -1.066194         | 6.801065         |
| $9s\ ^2S_{1/2}$  |                   |                   |                  | 2.296494          | -4.557171         | 8.474377         | 5.401261          | -1.066192         | 6.804243         |
| $9p\ ^2P_{1/2}$  | 5.062689          | -8.707647         | 3.793868         | 2.296357          | -4.566267         | 8.469604         | 5.401138          | -1.067512         | 6.801144         |
| $9p\ ^2P_{3/2}$  | 5.062688          | -8.707681         | 3.793866         | 2.296563          | -4.566857         | 8.469559         | 5.401017          | -1.067684         | 6.801029         |
| $9d\ ^2D_{3/2}$  | 5.062682          | -8.708018         | 3.793989         | 2.296447          | -4.561715         | 8.471259         | 5.400874          | -1.067336         | 6.800999         |
| $9d\ ^2D_{5/2}$  | 5.062573          | -8.707839         | 3.793991         | 2.296355          | -4.561439         | 8.471268         | 5.400858          | -1.067301         | 6.801003         |
| $9f\ ^2F_{5/2}$  | 5.062451          | -8.703007         | 3.793910         | 2.296230          | -4.560695         | 8.469559         | 5.400741          | -1.066070         | 6.801090         |
| $9f\ ^2F_{7/2}$  | 5.062452          | -8.703008         | 3.793910         | 2.296191          | -4.560694         | 8.469559         | 5.398467          | -1.066064         | 6.801096         |
| $9g\ ^2G_{7/2}$  | 5.062616          | -8.703210         | 3.794034         | 2.296325          | -4.557203         | 8.471364         | 5.400754          | -1.066128         | 6.801062         |
| $9g\ ^2G_{9/2}$  | 5.062616          | -8.703200         | 3.794034         | 2.296314          | -4.557202         | 8.471364         | 5.400750          | -1.066131         | 6.801062         |
| $9h\ ^2H_{9/2}$  | 5.062492          | -8.703174         | 3.793915         | 2.296176          | -4.560768         | 8.469559         | 5.400731          | -1.066087         | 6.801110         |
| $9h\ ^2H_{11/2}$ | 5.062492          | -8.703175         | 3.793915         | 2.296197          | -4.560771         | 8.469559         | 5.400728          | -1.066089         | 6.801110         |
| $9i\ ^2I_{11/2}$ | 5.062629          | -8.703663         | 3.794034         | 2.296324          | -4.557419         | 8.471367         | 5.400754          | -1.066171         | 6.801065         |
| $9i\ ^2I_{13/2}$ | 5.062629          | -8.703664         | 3.794034         | 2.296320          | -4.557420         | 8.471367         | 5.400752          | -1.066171         | 6.801065         |
